# Supplementary material
Source: publisher figshare collection journal article supplement (https://acs.figshare.com/ndownloader/files/14923952)
Supplement: Supplementary file 1 [file 14923952]

## Sheet: 1. Quantified proteins
S3: Protein levels. Sheet 1 lists all quantified proteins (protein levels in logarithmic scale). Sheet 2 lists up-and down regulations for the less-sensitive cells (T1454). Sheet 3 lists just the up-regulations.
All quantified proteins with detection in all replicates in at least one group (logaritmic)
	Intensity controls			Intensity treated T1454			Intensity treated T1459
T: Protein IDs	LFQ intensity Control_1	LFQ intensity Control_2	LFQ intensity Control_3	LFQ intensity Treated_T1454_1	LFQ intensity Treated_T1454_2	LFQ intensity Treated_T1454_3	LFQ intensity Treated_T1459_1	LFQ intensity Treated_T1459_2	LFQ intensity Treated_T1459_3	N: Peptides	N: Razor + unique peptides	N: Unique peptides	N: Sequence coverage [%]	N: Unique + razor sequence coverage [%]	N: Unique sequence coverage [%]	N: Mol. weight [kDa]	N: Q-value	N: Score	N: Intensity	N: MS/MS count	T: Majority protein IDs
sp|A0AVT1|UBA6_HUMAN	26.9537	NaN	24.5619	25.151	26.2206	27.5823	NaN	NaN	NaN	11	11	11	12.5	12.5	12.5	117.97	0	203.3	3158100000	82	sp|A0AVT1|UBA6_HUMAN
sp|A5YKK6|CNOT1_HUMAN	25.0085	25.0343	24.9133	24.7431	24.7387	24.0209	NaN	NaN	NaN	8	8	8	4.1	4.1	4.1	266.94	0	32.416	1260400000	53	sp|A5YKK6|CNOT1_HUMAN
sp|Q9GZQ8|MLP3B_HUMAN;sp|A6NCE7|MP3B2_HUMAN	27.3596	27.2317	26.8336	27.08	27.1814	27.992	NaN	NaN	NaN	7	7	5	40	40	32.8	14.688	0	51.65	10427000000	128	sp|Q9GZQ8|MLP3B_HUMAN;sp|A6NCE7|MP3B2_HUMAN
sp|A6NCN2|KR87P_HUMAN	28.2974	27.8798	24.7033	27.8908	29.8246	26.7655	25.7981	27.8335	30.5617	26	4	4	54.1	7.8	7.8	29.117	0	323.31	42906000000	521	sp|A6NCN2|KR87P_HUMAN
sp|A6ZKI3|RTL8C_HUMAN;sp|Q17RB0|RTL8B_HUMAN;sp|Q9BWD3|RTL8A_HUMAN	24.7111	25.9084	23.9574	24.5612	NaN	NaN	NaN	NaN	NaN	6	6	6	47.8	47.8	47.8	13.171	0	13.702	1662200000	40	sp|A6ZKI3|RTL8C_HUMAN;sp|Q17RB0|RTL8B_HUMAN;sp|Q9BWD3|RTL8A_HUMAN
sp|Q99613|EIF3C_HUMAN;sp|B5ME19|EIFCL_HUMAN	27.8095	26.9203	26.7163	26.9113	26.5953	25.9338	NaN	NaN	24.7744	21	21	21	19.8	19.8	19.8	105.34	0	321.26	5864800000	164	sp|Q99613|EIF3C_HUMAN;sp|B5ME19|EIFCL_HUMAN
sp|Q13765|NACA_HUMAN;sp|E9PAV3|NACAM_HUMAN;sp|Q9BZK3|NACP1_HUMAN	27.978	27.8561	27.7734	27.5646	25.5061	27.594	NaN	NaN	26.4967	11	11	11	32.6	32.6	32.6	23.384	0	323.31	10932000000	174	sp|Q13765|NACA_HUMAN;sp|E9PAV3|NACAM_HUMAN
sp|O00231|PSD11_HUMAN	26.4948	27.6087	27.3126	27.7353	27.5145	27.5592	NaN	NaN	25.2712	14	14	14	37.4	37.4	37.4	47.463	0	205.76	9702400000	161	sp|O00231|PSD11_HUMAN
sp|O00232|PSD12_HUMAN	25.7807	26.6024	NaN	26.6788	25.1474	25.9472	NaN	NaN	NaN	15	15	15	34.9	34.9	34.9	52.904	0	199.04	3335100000	89	sp|O00232|PSD12_HUMAN
sp|O00264|PGRC1_HUMAN	NaN	25.7876	26.699	25.2761	26.2487	24.9318	NaN	NaN	NaN	6	6	5	32.8	32.8	28.2	21.671	0	138.4	2887900000	46	sp|O00264|PGRC1_HUMAN
sp|O00299|CLIC1_HUMAN	29.8897	29.3795	28.2679	29.4711	28.6787	29.4974	NaN	NaN	25.9411	30	30	30	92.5	92.5	92.5	26.922	0	323.31	35055000000	450	sp|O00299|CLIC1_HUMAN
sp|O00303|EIF3F_HUMAN	27.5756	27.3337	25.8875	27.7249	25.608	26.4747	NaN	NaN	NaN	10	10	10	37.3	37.3	37.3	37.563	0	323.31	6537700000	127	sp|O00303|EIF3F_HUMAN
sp|O00410|IPO5_HUMAN	29.9385	27.9857	28.9538	28.4708	28.7661	29.0007	NaN	NaN	28.9008	40	40	38	47.7	47.7	47	123.63	0	323.31	24958000000	487	sp|O00410|IPO5_HUMAN
sp|O00425|IF2B3_HUMAN	25.5765	25.7149	24.5206	NaN	NaN	24.2928	NaN	NaN	NaN	10	10	9	24.5	24.5	22.3	63.704	0	124.18	1642900000	45	sp|O00425|IF2B3_HUMAN
sp|O00487|PSDE_HUMAN	26.4805	26.2229	25.5266	25.7669	26.1772	26.4541	NaN	NaN	NaN	9	9	9	44.2	44.2	44.2	34.577	0	190.17	3753000000	56	sp|O00487|PSDE_HUMAN
sp|O00571|DDX3X_HUMAN;sp|O15523|DDX3Y_HUMAN	28.0218	28.2385	28.1511	26.4695	26.0101	26.5584	NaN	NaN	NaN	17	17	17	28.1	28.1	28.1	73.243	0	323.31	8548900000	155	sp|O00571|DDX3X_HUMAN;sp|O15523|DDX3Y_HUMAN
sp|O00764|PDXK_HUMAN	26.4167	26.2548	26.1965	26.3944	26.6209	27.0774	NaN	NaN	NaN	12	12	12	60.9	60.9	60.9	35.102	0	260.83	5235900000	162	sp|O00764|PDXK_HUMAN
sp|O14579|COPE_HUMAN	27.2135	27.0526	26.0717	26.6761	26.0002	26.6168	NaN	NaN	NaN	13	13	13	69.2	69.2	69.2	34.482	0	323.31	5503100000	124	sp|O14579|COPE_HUMAN
sp|O14617|AP3D1_HUMAN	26.0978	25.5887	26.5316	26.6337	25.9635	25.9701	NaN	NaN	NaN	13	13	13	19	19	19	130.16	0	143.66	3302800000	125	sp|O14617|AP3D1_HUMAN
sp|O14737|PDCD5_HUMAN	26.0318	26.3938	24.4078	25.4965	24.0807	25.6948	NaN	NaN	NaN	8	8	8	61.6	61.6	61.6	14.285	0	81.179	3311700000	47	sp|O14737|PDCD5_HUMAN
sp|O14773|TPP1_HUMAN	NaN	26.1196	25.6976	25.5674	25.8707	24.4934	NaN	NaN	26.2917	4	4	4	16.5	16.5	16.5	61.247	0	129.21	2153500000	41	sp|O14773|TPP1_HUMAN
sp|O14818|PSA7_HUMAN;sp|Q8TAA3|PSMA8_HUMAN	27.923	28.521	27.2351	28.6078	27.1098	28.4885	NaN	NaN	27.5701	16	16	16	65.7	65.7	65.7	27.887	0	323.31	17481000000	274	sp|O14818|PSA7_HUMAN
sp|O14828|SCAM3_HUMAN	25.6279	26.0083	26.8008	NaN	26.4779	25.7541	NaN	NaN	NaN	4	4	4	17.9	17.9	17.9	38.287	0	323.31	3144300000	71	sp|O14828|SCAM3_HUMAN
sp|O14980|XPO1_HUMAN	28.161	27.1943	26.5802	28.3238	27.9166	27.8855	NaN	NaN	26.1535	26	26	26	33.9	33.9	33.9	123.38	0	323.31	12389000000	304	sp|O14980|XPO1_HUMAN
sp|O15061|SYNEM_HUMAN	NaN	NaN	27.8439	25.9347	25.9843	24.922	NaN	NaN	NaN	20	20	20	18.5	18.5	18.5	172.77	0	323.31	2572300000	58	sp|O15061|SYNEM_HUMAN
sp|O15067|PUR4_HUMAN	27.1929	25.8876	26.7209	27.1639	26.3909	26.9247	NaN	NaN	28.6431	21	21	21	24	24	24	144.73	0	323.31	5766000000	155	sp|O15067|PUR4_HUMAN
sp|O15143|ARC1B_HUMAN	26.0147	25.5073	25.4675	25.446	25.6571	25.6367	NaN	NaN	NaN	9	9	8	31.2	31.2	25	40.949	0	193.9	2724800000	83	sp|O15143|ARC1B_HUMAN
sp|O15144|ARPC2_HUMAN	28.1087	25.5949	25.3198	26.2363	25.4298	25.9013	NaN	NaN	NaN	14	14	14	48	48	48	34.333	0	229.9	4745700000	134	sp|O15144|ARPC2_HUMAN
sp|O15145|ARPC3_HUMAN	25.74	25.5888	25.9146	24.7418	24.9049	24.7866	NaN	NaN	NaN	9	9	9	47.2	47.2	47.2	20.546	0	160.18	2459500000	64	sp|O15145|ARPC3_HUMAN
sp|O15258|RER1_HUMAN	23.6739	24.1409	25.52	24.0892	NaN	NaN	NaN	NaN	NaN	4	4	4	24.5	24.5	24.5	22.958	0	101.69	1017900000	21	sp|O15258|RER1_HUMAN
sp|O15371|EIF3D_HUMAN	25.9499	25.7633	25.5007	24.7196	NaN	24.8511	NaN	NaN	NaN	11	11	11	24.6	24.6	24.6	63.972	0	323.31	1893800000	74	sp|O15371|EIF3D_HUMAN
sp|O15540|FABP7_HUMAN	31.1221	31.3591	29.2534	32.1419	31.0878	31.8488	NaN	NaN	26.3553	19	19	18	91.7	91.7	91.7	14.889	0	323.31	176060000000	505	sp|O15540|FABP7_HUMAN
sp|O43143|DHX15_HUMAN	26.3341	26.3476	25.8054	26.7309	25.3436	26.6193	NaN	NaN	27.0944	16	16	16	24.5	24.5	24.5	90.932	0	287.41	4331800000	121	sp|O43143|DHX15_HUMAN
sp|O43169|CYB5B_HUMAN	24.7174	24.43	26.4116	25.2695	NaN	24.4033	NaN	NaN	NaN	4	4	4	55.5	55.5	55.5	16.332	0	108.58	2334400000	58	sp|O43169|CYB5B_HUMAN
sp|O43175|SERA_HUMAN	28.7956	29.4015	28.1634	28.6509	28.6338	29.3793	NaN	NaN	27.6463	22	22	22	46.9	46.9	46.9	56.65	0	323.31	27452000000	345	sp|O43175|SERA_HUMAN
sp|O43242|PSMD3_HUMAN	27.9733	27.5426	26.6203	27.0461	26.7086	27.2478	NaN	NaN	26.3515	21	21	21	40.6	40.6	40.6	60.977	0	323.31	8605200000	227	sp|O43242|PSMD3_HUMAN
sp|O43324|MCA3_HUMAN	27.4447	26.2785	26.1678	27.1016	26.1164	26.5687	NaN	NaN	25.4152	8	8	8	52.9	52.9	52.9	19.81	0	124.93	6655100000	130	sp|O43324|MCA3_HUMAN
sp|O43390|HNRPR_HUMAN	26.7111	26.5772	25.8096	25.9608	24.9005	26.0711	NaN	NaN	25.8006	16	8	8	22.9	13.6	13.6	70.942	0	269.43	3708200000	100	sp|O43390|HNRPR_HUMAN
sp|O43396|TXNL1_HUMAN	26.4023	26.5571	25.8017	25.0493	25.3262	25.714	NaN	NaN	NaN	7	7	7	40.1	40.1	40.1	32.251	0	229.31	3402400000	65	sp|O43396|TXNL1_HUMAN
sp|O43399|TPD54_HUMAN	28.2627	28.0886	27.2129	28.3423	27.4676	27.9461	NaN	NaN	26.4907	5	5	5	35	35	35	22.237	0	323.31	14193000000	109	sp|O43399|TPD54_HUMAN
sp|O43488|ARK72_HUMAN;sp|Q8NHP1|ARK74_HUMAN;sp|O95154|ARK73_HUMAN	26.7791	26.1466	26.0686	26.3015	26.811	26.4966	NaN	NaN	NaN	8	8	8	37	37	37	39.589	0	302.93	4723200000	84	sp|O43488|ARK72_HUMAN
sp|O43491|E41L2_HUMAN	23.8997	23.453	24.0068	NaN	24.4206	NaN	NaN	NaN	NaN	4	4	4	8.9	8.9	8.9	112.59	0	81.002	610310000	22	sp|O43491|E41L2_HUMAN
sp|O43592|XPOT_HUMAN	27.1762	26.047	23.6232	25.7016	26.6316	26.4678	NaN	NaN	NaN	21	21	21	31.8	31.8	31.8	109.96	0	323.31	4107200000	147	sp|O43592|XPOT_HUMAN
sp|O43598|DNPH1_HUMAN	24.9532	24.5866	25.2445	25.8344	NaN	25.4963	NaN	NaN	26.4684	5	5	5	49.4	49.4	49.4	19.108	0	187.02	2396100000	74	sp|O43598|DNPH1_HUMAN
sp|O43681|ASNA_HUMAN	25.9612	25.7383	26.6373	NaN	25.9261	26.0465	NaN	NaN	NaN	11	11	11	51.1	51.1	51.1	38.792	0	157.74	3153900000	85	sp|O43681|ASNA_HUMAN
sp|O43707|ACTN4_HUMAN;sp|P35609|ACTN2_HUMAN;sp|Q08043|ACTN3_HUMAN	30.6072	30.4092	29.4682	29.907	29.9609	29.8006	NaN	NaN	28.0567	67	67	44	72.9	72.9	57.1	104.85	0	323.31	55984000000	875	sp|O43707|ACTN4_HUMAN
sp|O43747|AP1G1_HUMAN	26.0552	26.251	25.301	25.7198	26.0237	24.9574	NaN	NaN	NaN	9	9	9	15.6	15.6	15.6	91.35	0	107.8	2979200000	83	sp|O43747|AP1G1_HUMAN
sp|O43765|SGTA_HUMAN	26.98	25.317	25.4178	25.3929	NaN	25.6885	NaN	NaN	25.2471	7	7	7	25.9	25.9	25.9	34.063	0	96.064	2984900000	73	sp|O43765|SGTA_HUMAN
sp|O43776|SYNC_HUMAN	28.0379	28.3828	27.9794	27.9239	27.9303	28.2366	NaN	NaN	27.4416	16	16	16	32.7	32.7	32.7	62.942	0	323.31	14663000000	240	sp|O43776|SYNC_HUMAN
sp|O43852|CALU_HUMAN	24.4799	26.5939	27.0877	26.5751	28.3317	26.0401	NaN	NaN	NaN	11	11	11	47.3	47.3	47.3	37.106	0	323.31	6196200000	88	sp|O43852|CALU_HUMAN
sp|O60256|KPRB_HUMAN	24.6688	23.9308	25.169	25.0647	24.5256	24.9812	NaN	NaN	NaN	7	7	6	26.6	26.6	22.8	40.925	0	177.26	1318500000	77	sp|O60256|KPRB_HUMAN
sp|O60437|PEPL_HUMAN	NaN	NaN	26.3533	27.1824	26.5481	26.3289	NaN	NaN	NaN	21	21	21	18.5	18.5	18.5	204.74	0	323.31	2808200000	93	sp|O60437|PEPL_HUMAN
sp|O60493|SNX3_HUMAN	26.8201	26.7243	26.7662	25.4998	NaN	25.1067	NaN	NaN	NaN	10	10	9	45.7	45.7	45.7	18.762	0	159.46	4232300000	84	sp|O60493|SNX3_HUMAN
sp|O60506|HNRPQ_HUMAN	28.8388	29.0491	28.3948	28.4404	27.3864	28.3249	NaN	NaN	28.1038	26	26	18	43.3	43.3	35.8	69.602	0	323.31	20213000000	333	sp|O60506|HNRPQ_HUMAN
sp|O60568|PLOD3_HUMAN	25.2899	25.5776	26.5331	26.5424	26.8003	25.4563	NaN	NaN	NaN	19	19	19	34.1	34.1	34.1	84.784	0	245.41	3222300000	104	sp|O60568|PLOD3_HUMAN
sp|O60610|DIAP1_HUMAN	25.7285	25.1029	24.8115	26.118	24.8355	24.8859	NaN	NaN	NaN	8	8	8	8.3	8.3	8.3	141.35	0	75.406	1826100000	60	sp|O60610|DIAP1_HUMAN
sp|O60664|PLIN3_HUMAN	25.7852	25.756	25.658	25.5352	26.3393	26.9182	NaN	NaN	NaN	16	16	16	63.1	63.1	63.1	47.074	0	323.31	4089100000	134	sp|O60664|PLIN3_HUMAN
sp|O60684|IMA7_HUMAN;sp|O15131|IMA6_HUMAN	26.7064	26.4257	25.9881	25.8846	24.955	25.7372	NaN	NaN	NaN	7	7	5	22	22	17.4	60.029	0	221.05	3194600000	63	sp|O60684|IMA7_HUMAN
sp|O60701|UGDH_HUMAN	25.3274	24.9158	24.7275	24.4668	24.8565	24.0624	NaN	NaN	NaN	16	16	16	46.2	46.2	46.2	55.023	0	289.92	1442800000	77	sp|O60701|UGDH_HUMAN
sp|O60763|USO1_HUMAN;REV__sp|Q5VZ89|DEN4C_HUMAN	26.6105	26.285	25.2295	26.1333	27.7583	25.5217	NaN	NaN	NaN	16	16	16	22.2	22.2	22.2	107.89	0	323.31	4511700000	97	sp|O60763|USO1_HUMAN
sp|O60841|IF2P_HUMAN	25.6747	26.1219	26.7117	26.7516	25.7865	26.4643	NaN	NaN	NaN	9	9	9	13.5	13.5	13.5	138.83	0	304.8	3489400000	68	sp|O60841|IF2P_HUMAN
sp|O60869|EDF1_HUMAN	25.7149	26.1243	27.1241	24.9252	NaN	NaN	NaN	NaN	NaN	6	6	6	40.5	40.5	40.5	16.368	0	85.262	3100100000	51	sp|O60869|EDF1_HUMAN
sp|O60888|CUTA_HUMAN	26.5855	25.5982	25.5989	25.5392	25.9143	26.1387	NaN	NaN	NaN	3	3	3	33	33	33	19.116	0	135.44	4279000000	150	sp|O60888|CUTA_HUMAN
sp|O60925|PFD1_HUMAN	25.5707	26.3003	24.705	26.4196	25.0539	26.3365	NaN	NaN	NaN	5	5	5	32	32	32	14.21	0	40.624	3981400000	43	sp|O60925|PFD1_HUMAN
sp|O75083|WDR1_HUMAN	28.1328	28.678	26.6087	27.9025	27.2493	28.6267	NaN	NaN	26.2641	22	22	22	43.9	43.9	43.9	66.193	0	323.31	15733000000	249	sp|O75083|WDR1_HUMAN
sp|O75116|ROCK2_HUMAN	23.9479	24.8445	24.5626	25.2716	NaN	24.0389	NaN	NaN	NaN	3	3	1	2.4	2.4	0.7	160.9	0	26.054	927110000	28	sp|O75116|ROCK2_HUMAN
sp|O75131|CPNE3_HUMAN;sp|Q8IYJ1|CPNE9_HUMAN;sp|Q96A23|CPNE4_HUMAN;sp|O95741|CPNE6_HUMAN;sp|Q86YQ8|CPNE8_HUMAN;sp|Q9HCH3|CPNE5_HUMAN;sp|Q9UBL6|CPNE7_HUMAN	26.5177	26.3817	26.7629	25.8772	25.1616	26.0933	NaN	NaN	NaN	11	11	10	28.1	28.1	28.1	60.13	0	231.75	4286700000	137	sp|O75131|CPNE3_HUMAN
sp|O75153|CLU_HUMAN;sp|Q9Y5I4|PCDC2_HUMAN	25.9203	26.6075	25.0774	25.158	NaN	24.1965	NaN	NaN	NaN	17	17	17	16	16	16	146.67	0	142.28	2012700000	74	sp|O75153|CLU_HUMAN
sp|O75165|DJC13_HUMAN	NaN	25.8563	26.8945	24.5449	26.3768	22.7496	NaN	NaN	NaN	20	20	20	13.3	13.3	13.3	254.41	0	153.57	2055900000	82	sp|O75165|DJC13_HUMAN
sp|O75340|PDCD6_HUMAN	26.6903	27.2516	27.498	27.2234	26.383	26.3202	NaN	NaN	NaN	8	8	8	62.3	62.3	62.3	21.868	0	109.84	7532000000	136	sp|O75340|PDCD6_HUMAN
sp|O75347|TBCA_HUMAN	28.5549	28.8802	28.1443	28.9886	28.6067	29.3567	NaN	NaN	28.2147	9	9	9	56.5	56.5	56.5	12.855	0	323.31	30134000000	146	sp|O75347|TBCA_HUMAN
sp|O75348|VATG1_HUMAN;sp|O95670|VATG2_HUMAN	24.9172	24.9159	24.8798	25.3445	26.1775	NaN	NaN	NaN	NaN	4	4	4	59.3	59.3	59.3	13.757	0	172.56	2523600000	51	sp|O75348|VATG1_HUMAN
sp|O75369|FLNB_HUMAN	29.9791	29.4578	28.4375	29.7814	27.9934	29.3463	NaN	NaN	NaN	102	85	85	46.7	43.6	43.6	278.16	0	323.31	26006000000	569	sp|O75369|FLNB_HUMAN
sp|O75390|CISY_HUMAN	26.3448	26.4853	27.838	27.8514	27.8012	27.4443	NaN	NaN	28.2423	12	12	12	35.2	35.2	35.2	51.712	0	212.81	9714400000	179	sp|O75390|CISY_HUMAN
sp|O75396|SC22B_HUMAN	26.1442	25.5526	26.9307	26.0811	27.291	25.7941	NaN	NaN	NaN	9	9	9	39.1	39.1	39.1	24.593	0	323.31	4913000000	91	sp|O75396|SC22B_HUMAN
sp|O75608|LYPA1_HUMAN	25.3228	24.8198	24.4419	25.147	NaN	25.3071	NaN	NaN	NaN	7	7	7	43	43	43	24.669	0	99.783	1699600000	68	sp|O75608|LYPA1_HUMAN
sp|O75643|U520_HUMAN	26.8351	27.8624	27.1845	28.2318	27.2256	26.7748	NaN	NaN	26.7405	33	33	33	20.5	20.5	20.5	244.5	0	323.31	8392100000	253	sp|O75643|U520_HUMAN
sp|O75821|EIF3G_HUMAN	25.7441	25.4679	26.0623	25.7528	24.9958	25.9692	NaN	NaN	NaN	7	7	7	41.6	41.6	41.6	35.611	0	323.31	2567900000	82	sp|O75821|EIF3G_HUMAN
sp|O75822|EIF3J_HUMAN	27.3603	26.6409	26.9309	25.7095	26.074	26.565	NaN	NaN	NaN	9	9	9	40.3	40.3	40.3	29.062	0	172.57	5252000000	62	sp|O75822|EIF3J_HUMAN
sp|O75874|IDHC_HUMAN	27.3465	27.6771	28.1456	28.5758	29.2733	28.1222	NaN	NaN	26.6893	25	25	24	55.8	55.8	55.8	46.659	0	323.31	16659000000	287	sp|O75874|IDHC_HUMAN
sp|O75915|PRAF3_HUMAN	NaN	NaN	NaN	25.379	26.4043	24.3446	NaN	NaN	NaN	6	6	6	28.2	28.2	28.2	21.614	0	314.26	1718900000	43	sp|O75915|PRAF3_HUMAN
sp|O76003|GLRX3_HUMAN	26.5306	27.1606	26.8486	26.7119	NaN	26.8355	NaN	NaN	NaN	6	6	6	29	29	29	37.432	0	323.31	5425800000	63	sp|O76003|GLRX3_HUMAN
sp|O76021|RL1D1_HUMAN	24.2811	25.1396	24.2942	25.0827	NaN	24.1514	NaN	NaN	NaN	5	5	5	11.2	11.2	11.2	54.972	0	52.739	1139600000	66	sp|O76021|RL1D1_HUMAN
sp|O94760|DDAH1_HUMAN	24.7534	23.9182	24.0322	24.1822	NaN	25.1522	NaN	NaN	NaN	3	3	3	17.2	17.2	17.2	31.121	0	24.068	1009500000	44	sp|O94760|DDAH1_HUMAN
sp|O94973|AP2A2_HUMAN	27.2611	27.1771	26.7588	25.8737	26.5701	26.0432	NaN	NaN	NaN	19	19	11	29.5	29.5	20.7	103.96	0	298.72	5153200000	182	sp|O94973|AP2A2_HUMAN
sp|O94979|SC31A_HUMAN	27.1914	26.0194	26.6096	25.9372	26.791	27.2184	NaN	NaN	NaN	19	19	19	19	19	19	133.01	0	302.62	4772900000	119	sp|O94979|SC31A_HUMAN
sp|O95197|RTN3_HUMAN	26.1478	27.5202	28.3723	27.5973	28.1955	27.8672	NaN	NaN	NaN	7	7	7	8.4	8.4	8.4	112.61	0	103.1	12578000000	112	sp|O95197|RTN3_HUMAN
sp|O95336|6PGL_HUMAN	28.7728	28.8928	28.5455	29.0939	28.4416	28.767	NaN	NaN	26.8391	18	18	18	95.7	95.7	95.7	27.547	0	323.31	25155000000	318	sp|O95336|6PGL_HUMAN
sp|O95352|ATG7_HUMAN	24.3388	NaN	NaN	24.1628	24.0039	23.8298	NaN	NaN	NaN	6	6	6	14.2	14.2	14.2	77.959	0	35.764	629610000	33	sp|O95352|ATG7_HUMAN
sp|O95373|IPO7_HUMAN	28.9369	26.3556	27.5619	27.0043	27.1514	27.9858	NaN	NaN	26.3867	28	28	27	30.4	30.4	29.5	119.52	0	323.31	9893700000	327	sp|O95373|IPO7_HUMAN
sp|O95433|AHSA1_HUMAN	23.7867	24.2862	24.1581	NaN	NaN	24.4815	NaN	NaN	NaN	5	5	5	16.6	16.6	16.6	38.274	0	158.69	818630000	45	sp|O95433|AHSA1_HUMAN
sp|O95486|SC24A_HUMAN	24.4228	24.2607	24.3403	24.6862	24.215	NaN	NaN	NaN	NaN	6	6	6	5.2	5.2	5.2	119.75	0	33.205	903120000	47	sp|O95486|SC24A_HUMAN
sp|O95757|HS74L_HUMAN	27.0253	26.3065	NaN	24.1705	24.2259	25.3669	NaN	NaN	NaN	19	16	16	28.6	26.9	26.9	94.511	0	323.31	2731400000	101	sp|O95757|HS74L_HUMAN
sp|O95777|LSM8_HUMAN	24.5532	25.4001	24.5549	24.8957	NaN	24.5383	NaN	NaN	NaN	3	3	3	37.5	37.5	37.5	10.403	0	52.357	1724000000	46	sp|O95777|LSM8_HUMAN
sp|O95782|AP2A1_HUMAN	26.1576	25.4731	NaN	23.8331	24.5258	24.1969	NaN	NaN	NaN	18	10	10	23.2	14.7	14.7	107.54	0	54.52	1697700000	51	sp|O95782|AP2A1_HUMAN
sp|P00338|LDHA_HUMAN;sp|Q6ZMR3|LDH6A_HUMAN	32.8333	31.8473	30.9714	32.2525	31.3022	32.4863	25.5335	24.3147	31.5285	41	41	39	97.9	97.9	97.9	36.688	0	323.31	249320000000	1439	sp|P00338|LDHA_HUMAN
sp|P00387|NB5R3_HUMAN	24.5692	24.7806	NaN	25.4004	24.8565	25.2711	NaN	NaN	NaN	6	6	6	31.2	31.2	31.2	34.234	0	177.31	1802500000	48	sp|P00387|NB5R3_HUMAN
sp|P00441|SODC_HUMAN	29.8427	29.9858	30.0761	30.1298	30.3193	30.412	NaN	NaN	29.1706	12	12	12	91.6	91.6	91.6	15.936	0	323.31	72746000000	548	sp|P00441|SODC_HUMAN
sp|P00492|HPRT_HUMAN	25.7795	25.5147	23.8142	26.0021	24.4463	25.5266	NaN	NaN	NaN	10	10	10	67.4	67.4	67.4	24.579	0	276.49	2561900000	95	sp|P00492|HPRT_HUMAN
sp|P00505|AATM_HUMAN	25.8771	27.8013	29.1334	28.1501	29.4026	29.3737	NaN	NaN	25.187	21	21	21	57.7	57.7	57.7	47.517	0	323.31	20100000000	274	sp|P00505|AATM_HUMAN
sp|P00558|PGK1_HUMAN;sp|P07205|PGK2_HUMAN	30.5599	30.7635	30.7822	31.4055	31.3533	31.2944	NaN	NaN	31.7453	40	40	40	94.7	94.7	94.7	44.614	0	323.31	118510000000	1182	sp|P00558|PGK1_HUMAN
sp|P00568|KAD1_HUMAN;sp|Q9Y6K8|KAD5_HUMAN	26.5328	25.7778	25.0052	26.2415	24.8268	26.5754	NaN	NaN	NaN	10	10	10	54.6	54.6	54.6	21.635	0	172.07	3741400000	90	sp|P00568|KAD1_HUMAN
sp|P01116|RASK_HUMAN	25.0972	26.9107	28.2919	NaN	NaN	NaN	NaN	NaN	NaN	8	8	2	43.4	43.4	7.4	21.656	0	282.05	4689200000	77	sp|P01116|RASK_HUMAN
sp|P02786|TFR1_HUMAN	24.5046	26.5955	27.8359	25.6148	26.7383	NaN	NaN	NaN	NaN	15	15	15	25.4	25.4	25.4	84.87	0	128.39	3585400000	103	sp|P02786|TFR1_HUMAN
sp|P02792|FRIL_HUMAN	30.7461	29.6298	29.3484	28.7158	27.739	28.6013	NaN	NaN	29.4539	20	20	20	68	68	68	20.019	0	323.31	34950000000	524	sp|P02792|FRIL_HUMAN
sp|P02794|FRIH_HUMAN	31.8856	31.592	31.1989	30.0666	30.6119	31.1556	NaN	NaN	29.7664	22	22	22	95.1	95.1	95.1	21.225	0	323.31	103960000000	911	sp|P02794|FRIH_HUMAN
sp|P04075|ALDOA_HUMAN;sp|P05062|ALDOB_HUMAN	30.4394	31.4607	32.1253	31.7189	31.9545	32.1941	NaN	NaN	30.9039	44	44	38	98.1	98.1	84.1	39.42	0	323.31	182870000000	1534	sp|P04075|ALDOA_HUMAN
sp|P04080|CYTB_HUMAN	28.0768	28.1684	27.0304	28.3491	27.7717	27.8374	NaN	NaN	NaN	6	6	6	64.3	64.3	64.3	11.139	0	123.73	16651000000	120	sp|P04080|CYTB_HUMAN
sp|P04083|ANXA1_HUMAN	31.7047	31.3929	32.5176	31.9538	32.6371	32.6453	NaN	NaN	NaN	53	53	53	90.8	90.8	90.8	38.714	0	323.31	255950000000	1872	sp|P04083|ANXA1_HUMAN
sp|P04179|SODM_HUMAN	29.5874	29.3978	28.2879	30.4334	29.26	30.3457	NaN	NaN	NaN	19	19	19	88.7	88.7	88.7	24.75	0	323.31	49752000000	414	sp|P04179|SODM_HUMAN
sp|P04271|S100B_HUMAN	24.2981	23.589	24.8072	NaN	NaN	NaN	NaN	NaN	24.8912	4	4	4	45.7	45.7	45.7	10.713	0	105.94	1078500000	55	sp|P04271|S100B_HUMAN
sp|P04406|G3P_HUMAN;sp|O14556|G3PT_HUMAN;sp|O60733|PLPL9_HUMAN	33.2348	32.9382	33.5032	32.7255	33.7306	33.4465	30.0503	27.4612	32.4771	54	54	54	98.8	98.8	98.8	36.053	0	323.31	745710000000	5914	sp|P04406|G3P_HUMAN
sp|P04632|CPNS1_HUMAN;sp|Q96L46|CPNS2_HUMAN	27.1739	27.3478	25.7736	27.3645	26.3328	27.3233	NaN	NaN	NaN	15	15	15	60.1	60.1	60.1	28.315	0	323.31	8547800000	227	sp|P04632|CPNS1_HUMAN
sp|P04792|HSPB1_HUMAN	29.4792	30.2353	29.293	30.0445	28.4147	30.0958	NaN	NaN	24.2468	16	16	16	94.1	94.1	94.1	22.782	0	323.31	49175000000	532	sp|P04792|HSPB1_HUMAN
sp|P04843|RPN1_HUMAN	24.0444	26.6768	29.3541	27.0504	29.2781	23.9515	NaN	NaN	NaN	23	23	23	48.3	48.3	48.3	68.569	0	323.31	10029000000	273	sp|P04843|RPN1_HUMAN
sp|P04899|GNAI2_HUMAN;sp|P63096|GNAI1_HUMAN	25.7279	25.9743	27.3071	26.4664	27.4146	25.8195	NaN	NaN	NaN	11	11	9	48.5	48.5	41.7	40.45	0	323.31	4975300000	84	sp|P04899|GNAI2_HUMAN
sp|P05121|PAI1_HUMAN	NaN	25.3421	24.4641	26.4003	25.9435	25.0178	NaN	NaN	NaN	5	5	5	17.7	17.7	17.7	45.059	0	181.46	1974300000	35	sp|P05121|PAI1_HUMAN
sp|P05198|IF2A_HUMAN	27.9605	27.0678	26.3967	26.7418	26.1402	26.382	NaN	NaN	NaN	13	13	13	45.7	45.7	45.7	36.112	0	323.31	6477100000	125	sp|P05198|IF2A_HUMAN
sp|P05386|RLA1_HUMAN	30.2098	28.5501	30.2607	27.7125	28.7819	27.8976	NaN	NaN	27.7654	4	4	4	79.8	79.8	79.8	11.514	0	323.31	38308000000	216	sp|P05386|RLA1_HUMAN
sp|P05387|RLA2_HUMAN	29.0688	28.2717	28.7348	27.4289	27.9916	27.3455	NaN	NaN	NaN	9	9	9	82.6	82.6	82.6	11.665	0	323.31	20738000000	213	sp|P05387|RLA2_HUMAN
sp|P05388|RLA0_HUMAN;sp|Q8NHW5|RLA0L_HUMAN	29.4469	29.0842	29.7781	28.563	29.0917	28.9711	NaN	NaN	27.9749	19	19	19	60.6	60.6	60.6	34.273	0	323.31	32998000000	370	sp|P05388|RLA0_HUMAN;sp|Q8NHW5|RLA0L_HUMAN
sp|P05455|LA_HUMAN	28.1054	27.4867	27.7821	27.6466	27.2794	27.488	NaN	NaN	28.1153	21	21	21	55.9	55.9	55.9	46.836	0	323.31	11473000000	277	sp|P05455|LA_HUMAN
sp|P05556|ITB1_HUMAN	24.273	23.4396	25.6099	NaN	24.816	NaN	NaN	NaN	NaN	4	4	4	7.4	7.4	7.4	88.414	0	44.668	702720000	37	sp|P05556|ITB1_HUMAN
sp|P06576|ATPB_HUMAN	24.8628	24.9244	27.7816	26.7979	26.4387	25.4366	NaN	26.5274	29.4746	14	14	14	46.3	46.3	46.3	56.559	0	323.31	5734800000	129	sp|P06576|ATPB_HUMAN
sp|P06703|S10A6_HUMAN	29.8539	29.9606	29.8465	30.2926	29.4949	30.5064	NaN	NaN	NaN	13	13	13	88.9	88.9	88.9	10.18	0	323.31	67190000000	409	sp|P06703|S10A6_HUMAN
sp|P06733|ENOA_HUMAN	31.8299	32.9018	32.2291	32.6622	33.0608	33.3348	27.0623	24.927	33.1622	64	64	59	96.3	96.3	89.2	47.168	0	323.31	448570000000	3948	sp|P06733|ENOA_HUMAN
sp|P06737|PYGL_HUMAN	27.2392	26.4075	24.7321	26.1344	25.0695	26.0609	NaN	NaN	24.3241	30	17	16	37.7	25.6	23.6	97.147	0	323.31	4002100000	133	sp|P06737|PYGL_HUMAN
sp|P06744|G6PI_HUMAN;sp|Q8N196|SIX5_HUMAN	29.7635	29.7753	29.2188	29.7588	29.8787	30.5095	NaN	NaN	30.8374	35	35	25	64.9	64.9	48.9	63.146	0	323.31	59887000000	775	sp|P06744|G6PI_HUMAN
sp|P06748|NPM_HUMAN	29.0619	29.8348	28.8751	28.2432	29.8703	28.9255	NaN	NaN	28.0046	21	21	21	67.3	67.3	67.3	32.575	0	323.31	36034000000	683	sp|P06748|NPM_HUMAN
sp|P06865|HEXA_HUMAN	24.5962	25.0763	25.6387	25.2128	24.726	24.1951	NaN	NaN	NaN	4	4	4	9.3	9.3	9.3	60.702	0	38.976	1424800000	44	sp|P06865|HEXA_HUMAN
sp|P07099|HYEP_HUMAN	NaN	25.9197	28.8776	27.3539	29.6797	26.3804	NaN	NaN	NaN	23	23	23	60.9	60.9	60.9	52.948	0	323.31	11012000000	228	sp|P07099|HYEP_HUMAN
sp|P07108|ACBP_HUMAN	27.4969	28.5854	28.4774	28.1755	27.7776	27.0402	NaN	NaN	NaN	9	9	9	88.5	88.5	88.5	10.044	0	292.78	17936000000	112	sp|P07108|ACBP_HUMAN
sp|P07195|LDHB_HUMAN	31.9042	31.3806	31.0936	31.2789	31.6847	31.7955	26.0784	NaN	30.7236	32	30	30	80.8	80.8	80.8	36.638	0	323.31	178730000000	1178	sp|P07195|LDHB_HUMAN
sp|P07237|PDIA1_HUMAN	29.8707	30.4988	31.3942	30.8869	31.23	30.5187	29.3171	26.9029	30.5957	49	49	49	80.7	80.7	80.7	57.116	0	323.31	92700000000	1215	sp|P07237|PDIA1_HUMAN
sp|P07339|CATD_HUMAN	27.967	27.9473	28.0509	28.0221	28.7837	28.0849	NaN	NaN	25.7244	21	21	21	43.7	43.7	43.7	44.552	0	323.31	16141000000	276	sp|P07339|CATD_HUMAN
sp|P07355|ANXA2_HUMAN;sp|A6NMY6|AXA2L_HUMAN	30.8409	31.2181	32.3806	31.1763	32.448	30.9735	NaN	NaN	NaN	58	58	58	91.2	91.2	91.2	38.604	0	323.31	174430000000	1724	sp|P07355|ANXA2_HUMAN;sp|A6NMY6|AXA2L_HUMAN
sp|P07384|CAN1_HUMAN	25.041	25.3222	NaN	25.3156	25.4018	24.451	NaN	NaN	NaN	10	10	10	17.8	17.8	17.8	81.889	0	71.465	1679500000	46	sp|P07384|CAN1_HUMAN
sp|P07437|TBB5_HUMAN;sp|A6NNZ2|TBB8L_HUMAN;sp|Q9H4B7|TBB1_HUMAN;CON__ENSEMBL:ENSBTAP00000025008	29.7478	29.8934	28.8801	30.5102	29.3877	29.9394	NaN	NaN	29.8748	39	8	8	74.3	19.1	19.1	49.67	0	323.31	56235000000	632	sp|P07437|TBB5_HUMAN
sp|P07602|SAP_HUMAN	24.9522	25.8744	26.6702	25.1646	25.8292	24.7542	NaN	NaN	24.9162	6	6	6	11.3	11.3	11.3	58.112	0	27.874	3573300000	63	sp|P07602|SAP_HUMAN
sp|P07686|HEXB_HUMAN	25.1468	26.0304	25.6828	26.6181	25.9323	25.818	NaN	NaN	NaN	10	10	10	28.6	28.6	28.6	63.111	0	188.43	3500300000	83	sp|P07686|HEXB_HUMAN
sp|P07737|PROF1_HUMAN;CON__P02584	29.8539	30.4821	30.0874	30.7975	29.8699	30.6885	NaN	NaN	29.1265	21	21	21	97.1	97.1	97.1	15.054	0	323.31	88339000000	473	sp|P07737|PROF1_HUMAN
sp|P07741|APT_HUMAN	27.7239	27.187	28.1968	27.2765	26.7915	27.1396	NaN	NaN	28.3174	13	13	13	67.8	67.8	67.8	19.608	0	322.1	11721000000	211	sp|P07741|APT_HUMAN
sp|P07814|SYEP_HUMAN	30.192	30.32	30.3043	30.8907	29.9519	30.7486	NaN	NaN	26.3338	79	79	79	58	58	58	170.59	0	323.31	62822000000	1104	sp|P07814|SYEP_HUMAN
sp|P07858|CATB_HUMAN	26.3755	26.438	25.46	26.9035	25.7694	26.6926	NaN	NaN	NaN	7	7	7	25.1	25.1	25.1	37.821	0	202.65	4834600000	85	sp|P07858|CATB_HUMAN
sp|P07900|HS90A_HUMAN;sp|Q14568|HS902_HUMAN;sp|Q58FG0|HS905_HUMAN;sp|Q58FG1|HS904_HUMAN	32.1875	32.009	31.1659	31.0712	29.7351	31.6788	23.5968	23.6791	31.973	80	54	54	66.1	51.8	51.8	84.659	0	323.31	173900000000	1681	sp|P07900|HS90A_HUMAN
sp|P07910|HNRPC_HUMAN;sp|P0DMR1|HNRC4_HUMAN;sp|O60812|HNRC1_HUMAN;sp|B7ZW38|HNRC3_HUMAN;sp|B2RXH8|HNRC2_HUMAN	26.5403	25.3366	26.4993	24.7449	NaN	NaN	NaN	NaN	27.7336	11	11	11	27.8	27.8	27.8	33.67	0	38.22	3205000000	78	sp|P07910|HNRPC_HUMAN
sp|P07954|FUMH_HUMAN	24.1774	26.1933	25.7992	27.0106	26.475	27.3796	NaN	NaN	26.0626	11	11	11	39	39	39	54.636	0	323.31	5616800000	117	sp|P07954|FUMH_HUMAN
sp|P08133|ANXA6_HUMAN	26.9099	27.5452	27.6303	27.7926	28.1581	27.383	NaN	NaN	NaN	27	27	27	47.4	47.4	47.4	75.872	0	323.31	9589400000	264	sp|P08133|ANXA6_HUMAN
sp|P08134|RHOC_HUMAN;sp|P62745|RHOB_HUMAN	27.3348	27.26	27.684	27.5054	26.4922	27.5281	NaN	NaN	NaN	11	11	3	66.3	66.3	23.3	22.006	0	221.24	9812300000	148	sp|P08134|RHOC_HUMAN
sp|P08195|4F2_HUMAN	24.91	25.3955	28.607	25.5543	28.4495	NaN	NaN	NaN	NaN	17	17	17	40.3	40.3	40.3	67.993	0	323.31	5721700000	146	sp|P08195|4F2_HUMAN
sp|P08237|PFKAM_HUMAN	25.9626	25.6106	NaN	25.4043	26.4059	25.9113	NaN	NaN	NaN	15	12	12	21.7	18.2	18.2	85.182	0	138.39	2872100000	56	sp|P08237|PFKAM_HUMAN
sp|P08238|HS90B_HUMAN;sp|Q58FF7|H90B3_HUMAN	33.172	33.0559	32.1306	32.4653	32.909	33.1075	26.731	NaN	32.8418	94	91	60	80.7	80	68.9	83.263	0	323.31	424120000000	3244	sp|P08238|HS90B_HUMAN
sp|P08243|ASNS_HUMAN	26.2017	26.6468	23.6641	25.7853	23.9144	26.503	NaN	NaN	NaN	17	17	17	40.8	40.8	40.8	64.369	0	267.95	3425800000	116	sp|P08243|ASNS_HUMAN
sp|P08670|VIME_HUMAN;sp|P17661|DESM_HUMAN;sp|Q16352|AINX_HUMAN;sp|P07197|NFM_HUMAN;sp|P07196|NFL_HUMAN	31.8511	34.4606	34.2306	34.9929	34.9793	35.3322	28.6276	26.0095	33.5477	107	107	96	99.1	99.1	96.8	53.651	0	323.31	1636900000000	8989	sp|P08670|VIME_HUMAN
sp|P08708|RS17_HUMAN	28.4504	28.6072	29.0912	27.9073	27.6078	28.6771	NaN	NaN	NaN	15	15	15	80.7	80.7	80.7	15.55	0	323.31	21311000000	212	sp|P08708|RS17_HUMAN
sp|P08758|ANXA5_HUMAN	32.2912	31.378	30.7998	31.6185	31.9514	31.6516	24.1096	NaN	27.135	50	50	50	98.8	98.8	98.8	35.936	0	323.31	181420000000	1461	sp|P08758|ANXA5_HUMAN
sp|P08865|RSSA_HUMAN	29.6939	30.0028	30.779	29.3607	29.8784	30.151	NaN	NaN	29.4563	18	18	18	68.8	68.8	68.8	32.854	0	323.31	57478000000	487	sp|P08865|RSSA_HUMAN
sp|P09104|ENOG_HUMAN;sp|P13929|ENOB_HUMAN	23.8029	28.1866	26.4036	28.5494	27.9179	29.6647	NaN	NaN	24.8674	27	22	22	78.8	68.2	68.2	47.268	0	323.31	19308000000	281	sp|P09104|ENOG_HUMAN
sp|P09211|GSTP1_HUMAN	29.9675	29.5651	29.843	30.2342	30.067	30.2382	NaN	NaN	30.1994	16	16	16	72.9	72.9	72.9	23.356	0	323.31	64063000000	521	sp|P09211|GSTP1_HUMAN
sp|P09382|LEG1_HUMAN	28.4921	29.9117	27.6264	30.0057	29.4543	29.8461	NaN	NaN	NaN	12	12	12	82.2	82.2	82.2	14.716	0	323.31	48048000000	312	sp|P09382|LEG1_HUMAN
sp|P09417|DHPR_HUMAN	26.9967	26.9051	26.1191	27.0629	26.561	27.3165	NaN	NaN	NaN	9	9	9	41.4	41.4	41.4	25.789	0	207.01	6876900000	115	sp|P09417|DHPR_HUMAN
sp|P09429|HMGB1_HUMAN;sp|B2RPK0|HGB1A_HUMAN	28.178	28.0933	27.7318	27.6342	27.0912	28.2534	NaN	NaN	NaN	9	9	8	28.4	28.4	25.1	24.893	0	177.53	13265000000	187	sp|P09429|HMGB1_HUMAN;sp|B2RPK0|HGB1A_HUMAN
sp|P09488|GSTM1_HUMAN	26.3081	25.9067	NaN	26.8417	25.8566	26.4815	NaN	NaN	NaN	11	10	2	43.6	40.4	11.5	25.712	0	171.9	4127900000	88	sp|P09488|GSTM1_HUMAN
sp|P09496|CLCA_HUMAN	26.3611	26.1163	25.6167	NaN	NaN	25.1662	NaN	NaN	NaN	7	7	7	23	23	23	27.076	0	82.88	2361100000	32	sp|P09496|CLCA_HUMAN
sp|P09543|CN37_HUMAN	23.6224	26.1936	27.1239	24.8447	25.2392	24.4243	NaN	NaN	NaN	10	10	10	33	33	33	47.578	0	323.31	2821500000	104	sp|P09543|CN37_HUMAN
sp|P09622|DLDH_HUMAN	NaN	NaN	NaN	25.921	25.2567	25.1723	NaN	NaN	NaN	8	8	8	25.7	25.7	25.7	54.177	0	104.17	1701000000	41	sp|P09622|DLDH_HUMAN
sp|P09651|ROA1_HUMAN;sp|Q32P51|RA1L2_HUMAN	28.8858	28.4213	28.7211	27.4412	27.7341	27.5445	NaN	NaN	28.2162	19	19	19	38.7	38.7	38.7	38.746	0	323.31	17582000000	284	sp|P09651|ROA1_HUMAN
sp|P09661|RU2A_HUMAN	24.8646	23.2027	23.4961	24.9286	NaN	NaN	NaN	NaN	NaN	7	7	7	42.7	42.7	42.7	28.415	0	87.423	862800000	40	sp|P09661|RU2A_HUMAN
sp|P09874|PARP1_HUMAN	25.4851	24.3484	26.196	NaN	24.4591	24.4523	NaN	NaN	26.4418	10	10	10	13.7	13.7	13.7	113.08	0	76.962	1320400000	58	sp|P09874|PARP1_HUMAN
sp|P09936|UCHL1_HUMAN	30.0657	29.6673	29.9859	29.6018	29.9896	30.0288	NaN	NaN	30.0041	19	19	19	92.4	92.4	92.4	24.824	0	323.31	57868000000	559	sp|P09936|UCHL1_HUMAN
sp|P09960|LKHA4_HUMAN	26.0741	26.3678	25.0021	26.5601	25.3861	26.5694	NaN	NaN	NaN	17	17	17	40.8	40.8	40.8	69.284	0	323.31	3954700000	122	sp|P09960|LKHA4_HUMAN
sp|P09972|ALDOC_HUMAN	NaN	26.6979	27.4134	27.2495	26.1414	28.0376	NaN	NaN	NaN	19	13	13	54.4	40.4	40.4	39.455	0	323.31	7224700000	134	sp|P09972|ALDOC_HUMAN
sp|P0DMV9|HS71B_HUMAN;sp|P0DMV8|HS71A_HUMAN	30.6847	30.6756	29.3415	30.111	29.4124	29.9424	NaN	NaN	26.4303	45	41	26	62.6	60.1	43.4	70.051	0	323.31	58912000000	683	sp|P0DMV9|HS71B_HUMAN;sp|P0DMV8|HS71A_HUMAN
sp|P0DP25|CALM3_HUMAN;sp|P0DP24|CALM2_HUMAN;sp|P0DP23|CALM1_HUMAN	26.4379	27.3242	26.9206	26.9848	24.8897	26.4406	NaN	NaN	NaN	4	4	4	30.9	30.9	30.9	16.837	0	318.28	6752200000	107	sp|P0DP25|CALM3_HUMAN;sp|P0DP24|CALM2_HUMAN;sp|P0DP23|CALM1_HUMAN
sp|P10155|RO60_HUMAN	25.8605	26.3833	24.5982	26.131	25.8437	27.3279	NaN	NaN	26.5559	12	12	12	29	29	29	60.67	0	149.07	4960600000	92	sp|P10155|RO60_HUMAN
sp|P10253|LYAG_HUMAN	25.8982	25.5886	25.1322	26.2357	25.7325	26.1149	NaN	NaN	27.1092	11	11	11	20.9	20.9	20.9	105.32	0	316.83	3473800000	111	sp|P10253|LYAG_HUMAN
sp|P10515|ODP2_HUMAN	24.2748	24.8018	25.0803	NaN	NaN	NaN	NaN	NaN	NaN	3	3	3	6.5	6.5	6.5	68.996	0	5.133	1257400000	18	sp|P10515|ODP2_HUMAN
sp|P10599|THIO_HUMAN	28.4886	28.8003	27.4543	28.8232	27.8203	27.9708	NaN	NaN	NaN	9	9	9	72.4	72.4	72.4	11.737	0	210.58	22655000000	222	sp|P10599|THIO_HUMAN
sp|P10620|MGST1_HUMAN	23.7788	27.2255	27.3706	27.579	28.0564	26.3572	NaN	NaN	NaN	5	5	5	44.5	44.5	44.5	17.598	0	323.31	9892500000	118	sp|P10620|MGST1_HUMAN
sp|P10768|ESTD_HUMAN	29.0023	28.1436	27.3389	28.5857	28.3735	28.4861	NaN	NaN	26.3347	23	23	23	88.7	88.7	88.7	31.462	0	323.31	18867000000	408	sp|P10768|ESTD_HUMAN
sp|P10809|CH60_HUMAN	29.515	29.6181	30.0557	30.0767	29.9446	30.4486	27.3591	29.1258	30.6961	51	51	51	75.6	75.6	75.6	61.054	0	323.31	60843000000	883	sp|P10809|CH60_HUMAN
sp|P11021|BIP_HUMAN	30.876	31.5255	34.0153	31.5728	34.8807	32.1405	31.1026	27.3804	31.6785	85	85	84	81.3	81.3	81.3	72.332	0	323.31	475760000000	2781	sp|P11021|BIP_HUMAN
sp|P11142|HSP7C_HUMAN;sp|P54652|HSP72_HUMAN	32.7585	32.765	32.1149	31.7088	31.4544	32.1557	26.6422	NaN	32.1787	54	53	46	70.6	70.6	69.5	70.897	0	323.31	270490000000	1693	sp|P11142|HSP7C_HUMAN
sp|P11216|PYGB_HUMAN	31.8788	31.6301	31.2502	31.5383	31.9931	31.4568	NaN	NaN	28.9018	78	78	62	76.5	76.5	63.3	96.695	0	323.31	165940000000	1906	sp|P11216|PYGB_HUMAN
sp|P11279|LAMP1_HUMAN	25.5236	24.6826	27.748	25.1773	27.4799	NaN	25.4815	NaN	NaN	9	9	9	20.6	20.6	20.6	44.882	0	132.77	3716400000	94	sp|P11279|LAMP1_HUMAN
sp|P11387|TOP1_HUMAN;sp|Q969P6|TOP1M_HUMAN	23.7293	24.0046	25.0766	NaN	NaN	NaN	NaN	NaN	NaN	3	3	3	5.5	5.5	5.5	90.725	0	7.3925	561480000	15	sp|P11387|TOP1_HUMAN
sp|P11413|G6PD_HUMAN	28.8011	28.8849	28.126	28.7476	28.8681	29.1916	NaN	NaN	25.4043	34	34	34	66.4	66.4	66.4	59.256	0	323.31	24962000000	422	sp|P11413|G6PD_HUMAN
sp|P11586|C1TC_HUMAN	27.457	26.8016	27.3554	26.1139	26.7823	25.4546	NaN	NaN	26.8585	22	22	22	33	33	33	101.56	0	277.05	5554600000	164	sp|P11586|C1TC_HUMAN
sp|P11717|MPRI_HUMAN	27.6403	28.0208	28.5357	25.7251	28.3544	NaN	NaN	NaN	NaN	44	44	44	25.7	25.7	25.7	274.37	0	323.31	8143900000	210	sp|P11717|MPRI_HUMAN
sp|P11766|ADHX_HUMAN	29	27.6585	27.4561	28.0344	27.9427	28.3724	NaN	NaN	NaN	20	20	20	61	61	61	39.724	0	323.31	15421000000	263	sp|P11766|ADHX_HUMAN
sp|P11802|CDK4_HUMAN;sp|P50750|CDK9_HUMAN;sp|Q96Q40|CDK15_HUMAN;sp|O94921|CDK14_HUMAN;sp|Q07002|CDK18_HUMAN;sp|Q00536|CDK16_HUMAN;sp|Q00537|CDK17_HUMAN;sp|Q9NYV4|CDK12_HUMAN;sp|Q14004|CDK13_HUMAN	28.0718	26.9634	28.0219	NaN	NaN	NaN	NaN	NaN	27.568	11	11	10	43.2	43.2	40.6	33.729	0	191.47	6988000000	112	sp|P11802|CDK4_HUMAN
sp|P11940|PABP1_HUMAN;sp|Q9H361|PABP3_HUMAN;sp|Q4VXU2|PAP1L_HUMAN;sp|Q96DU9|PABP5_HUMAN	29.5219	29.7672	28.8405	28.34	27.7908	27.964	NaN	NaN	28.0418	24	24	13	30.3	30.3	14.5	70.67	0	323.31	25001000000	345	sp|P11940|PABP1_HUMAN
sp|P12004|PCNA_HUMAN	28.8844	27.8968	27.1065	24.9427	NaN	24.9791	NaN	NaN	26.3112	12	12	12	39.1	39.1	39.1	28.768	0	323.31	8468200000	82	sp|P12004|PCNA_HUMAN
sp|P12081|SYHC_HUMAN;sp|P49590|SYHM_HUMAN	26.0849	25.5058	24.1777	26.3514	24.1689	26.1733	NaN	NaN	NaN	16	16	16	34.8	34.8	34.8	57.41	0	232.67	2747800000	85	sp|P12081|SYHC_HUMAN
sp|P12109|CO6A1_HUMAN	26.0399	NaN	25.3856	25.9882	24.9131	27.0719	NaN	NaN	NaN	13	13	13	17.1	17.1	17.1	108.53	0	261.19	2246200000	61	sp|P12109|CO6A1_HUMAN
sp|P12236|ADT3_HUMAN	26.4103	26.2719	29.7621	28.3719	28.2351	NaN	NaN	NaN	NaN	16	16	5	47.3	47.3	15.1	32.866	0	323.31	14218000000	187	sp|P12236|ADT3_HUMAN
sp|P12268|IMDH2_HUMAN	28.3771	27.9259	25.8264	26.9273	NaN	27.042	NaN	NaN	27.6145	19	19	18	38.1	38.1	36.6	55.804	0	323.31	8598000000	159	sp|P12268|IMDH2_HUMAN
sp|P12277|KCRB_HUMAN	29.6696	27.0031	27.9945	25.9421	23.9326	25.9094	NaN	NaN	30.6586	19	19	19	57.5	57.5	57.5	42.644	0	323.31	17716000000	246	sp|P12277|KCRB_HUMAN
sp|P12814|ACTN1_HUMAN	27.0814	26.3623	25.129	25.1047	25.4383	25.1648	NaN	NaN	26.6516	37	15	15	41.5	21.5	21.5	103.06	0	323.31	3605000000	120	sp|P12814|ACTN1_HUMAN
sp|P12955|PEPD_HUMAN	27.0151	27.4827	28.1971	26.8044	27.4054	27.2416	NaN	NaN	27.4627	10	10	10	28.6	28.6	28.6	54.548	0	323.31	9323100000	120	sp|P12955|PEPD_HUMAN
sp|P12956|XRCC6_HUMAN	28.3396	28.5038	28.0497	26.7556	27.6694	27.8257	NaN	NaN	29.3719	31	31	31	51.9	51.9	51.9	69.842	0	323.31	16420000000	371	sp|P12956|XRCC6_HUMAN
sp|P13010|XRCC5_HUMAN	28.8671	28.9371	28.4545	28.4192	28.5036	28.5114	NaN	NaN	29.7303	38	38	38	63.9	63.9	63.9	82.704	0	323.31	24489000000	443	sp|P13010|XRCC5_HUMAN
sp|P13489|RINI_HUMAN	26.0449	28.2966	27.6124	27.8795	28.8881	28.2333	NaN	NaN	NaN	20	20	20	67.7	67.7	67.7	49.973	0	323.31	14183000000	255	sp|P13489|RINI_HUMAN
sp|P13639|EF2_HUMAN	31.7227	31.7207	31.1277	30.5041	30.7063	30.8632	24.8662	NaN	30.0272	67	67	65	77.3	77.3	76.1	95.337	0	323.31	145260000000	1993	sp|P13639|EF2_HUMAN
sp|P13667|PDIA4_HUMAN	27.617	28.6309	30.397	28.4324	31.9543	29.7753	29.222	26.5288	29.8592	68	68	68	73	73	73	72.932	0	323.31	63095000000	899	sp|P13667|PDIA4_HUMAN
sp|P13693|TCTP_HUMAN;sp|Q56UQ5|TPT1L_HUMAN;sp|Q9HAU6|TCTP8_HUMAN	26.413	26.9652	27.0027	25.2476	26.2861	26.4935	NaN	NaN	NaN	10	10	10	47.1	47.1	47.1	19.595	0	124.9	5422500000	101	sp|P13693|TCTP_HUMAN
sp|P13797|PLST_HUMAN;sp|Q14651|PLSI_HUMAN;sp|P13796|PLSL_HUMAN	28.4767	28.3308	28.5453	28.7005	28.6096	28.4803	NaN	NaN	NaN	33	33	33	61.6	61.6	61.6	70.81	0	323.31	18604000000	290	sp|P13797|PLST_HUMAN
sp|P13798|ACPH_HUMAN	25.9539	25.77	25.4921	NaN	26.2599	26.6562	NaN	NaN	NaN	11	11	11	26.8	26.8	26.8	81.224	0	189.19	3230900000	80	sp|P13798|ACPH_HUMAN
sp|P13804|ETFA_HUMAN	26.4365	25.6745	25.2953	25.5539	NaN	25.766	NaN	NaN	26.3352	10	10	10	43.8	43.8	43.8	35.079	0	315.67	2982700000	101	sp|P13804|ETFA_HUMAN
sp|P13861|KAP2_HUMAN;sp|P31323|KAP3_HUMAN	24.2855	24.6273	NaN	25.5238	25.6203	25.4319	NaN	NaN	NaN	10	10	10	34.4	34.4	34.4	45.518	0	254.62	1867700000	77	sp|P13861|KAP2_HUMAN
sp|P14136|GFAP_HUMAN	29.4343	33.6804	32.6815	34.5975	34.1549	34.6604	25.3424	NaN	NaN	96	93	92	97.5	97.5	94.9	49.88	0	323.31	846870000000	4128	sp|P14136|GFAP_HUMAN
sp|P14174|MIF_HUMAN	27.8679	27.8135	27.4711	27.4597	26.9601	26.2619	NaN	NaN	27.4514	5	5	5	22.6	22.6	22.6	12.476	0	87.019	12269000000	170	sp|P14174|MIF_HUMAN
sp|P14314|GLU2B_HUMAN	25.5727	26.5501	25.3932	26.5515	26.9465	NaN	26.1505	26.2637	26.3843	14	14	14	22.2	22.2	22.2	59.425	0	88.173	4215000000	85	sp|P14314|GLU2B_HUMAN
sp|P14324|FPPS_HUMAN	26.9713	26.0801	25.7765	26.375	26.1927	27.7261	NaN	NaN	24.9159	14	14	14	40.1	40.1	40.1	48.275	0	323.31	5649000000	111	sp|P14324|FPPS_HUMAN
sp|P14550|AK1A1_HUMAN	26.3403	26.4629	26.7262	26.2288	26.8715	26.9573	NaN	NaN	NaN	12	12	12	52.3	52.3	52.3	36.573	0	238.92	4989300000	130	sp|P14550|AK1A1_HUMAN
sp|P14618|KPYM_HUMAN;sp|P30613|KPYR_HUMAN	33.1761	33.2002	32.6147	33.0427	33.1995	33.814	26.5419	23.3462	31.8988	79	79	79	95.1	95.1	95.1	57.936	0	323.31	551800000000	4549	sp|P14618|KPYM_HUMAN
sp|P14625|ENPL_HUMAN;sp|Q58FF3|ENPLL_HUMAN	30.4852	30.8324	32.971	30.6473	33.8568	31.2387	29.7197	28.4199	31.2355	98	98	95	74.7	74.7	74.5	92.468	0	323.31	234990000000	2433	sp|P14625|ENPL_HUMAN
sp|P14868|SYDC_HUMAN	27.5373	27.7077	NaN	27.7108	27.5702	27.9863	NaN	NaN	25.7695	22	22	22	57.7	57.7	57.7	57.136	0	323.31	9598300000	165	sp|P14868|SYDC_HUMAN
sp|P14923|PLAK_HUMAN	25.3733	23.8549	25.1462	24.9715	27.4926	NaN	26.74	27.1426	28.5171	13	13	11	23.2	23.2	20.8	81.744	0	243.1	4361400000	159	sp|P14923|PLAK_HUMAN
sp|P15121|ALDR_HUMAN;sp|C9JRZ8|AK1BF_HUMAN	29.5969	28.6265	29.2128	29.3262	29.6588	29.6248	NaN	NaN	28.5302	22	22	22	75.6	75.6	75.6	35.853	0	323.31	37323000000	485	sp|P15121|ALDR_HUMAN
sp|P15144|AMPN_HUMAN	NaN	NaN	26.1655	26.8808	27.0452	25.3649	NaN	NaN	NaN	20	20	20	28.7	28.7	28.7	109.54	0	114.18	2667600000	62	sp|P15144|AMPN_HUMAN
sp|P15311|EZRI_HUMAN	27.3163	27.3752	26.3874	27.6148	27.6566	27.4225	NaN	NaN	NaN	32	18	18	47.8	35.2	35.2	69.412	0	323.31	8649500000	181	sp|P15311|EZRI_HUMAN
sp|P15531|NDKA_HUMAN	27.7853	26.7492	27.0416	27.2357	26.7632	27.6699	NaN	NaN	27.4298	16	9	9	90.8	55.3	55.3	17.149	0	226.38	10222000000	164	sp|P15531|NDKA_HUMAN
sp|P15559|NQO1_HUMAN	28.0292	27.1975	27.5009	26.4522	26.9552	26.6276	NaN	NaN	NaN	11	11	11	42.3	42.3	42.3	30.867	0	163.85	7994400000	118	sp|P15559|NQO1_HUMAN
sp|P15586|GNS_HUMAN	25.2989	24.6731	25.8432	25.8129	26.0631	25.1851	NaN	NaN	NaN	12	12	12	32.8	32.8	32.8	62.081	0	90.885	2382700000	69	sp|P15586|GNS_HUMAN
sp|P15880|RS2_HUMAN	30.0669	29.3696	28.8277	28.4118	28.3361	28.3109	NaN	NaN	25.3142	24	24	24	60.1	60.1	60.1	31.324	0	323.31	28062000000	386	sp|P15880|RS2_HUMAN
sp|P16070|CD44_HUMAN	27.9408	27.8503	28.3455	28.0668	27.2713	26.7336	NaN	NaN	NaN	9	9	9	12.5	12.5	12.5	81.537	0	91.545	10178000000	100	sp|P16070|CD44_HUMAN
sp|P16152|CBR1_HUMAN	29.022	28.7948	27.7761	27.5576	26.7851	27.4254	NaN	NaN	27.1845	19	19	16	77.6	77.6	70.4	30.375	0	323.31	15752000000	277	sp|P16152|CBR1_HUMAN
sp|P16278|BGAL_HUMAN	24.4329	25.1188	25.146	25.3524	24.8931	24.7878	NaN	NaN	24.8986	7	7	7	16.2	16.2	16.2	76.074	0	82.971	1704000000	65	sp|P16278|BGAL_HUMAN
sp|P16930|FAAA_HUMAN	NaN	NaN	24.2434	25.2244	24.6051	24.4661	NaN	NaN	NaN	4	4	4	14.1	14.1	14.1	46.374	0	30.298	853240000	24	sp|P16930|FAAA_HUMAN
sp|P16949|STMN1_HUMAN	27.0333	26.1703	26.8329	26.1109	25.2179	27.0514	NaN	NaN	NaN	10	10	7	53.7	53.7	42.3	17.302	0	178.94	5740600000	104	sp|P16949|STMN1_HUMAN
sp|P17174|AATC_HUMAN	23.5967	25.3601	26.1838	24.8016	27.5563	26.8317	NaN	NaN	24.7758	16	16	16	52.8	52.8	52.8	46.247	0	273.79	3953700000	135	sp|P17174|AATC_HUMAN
sp|P17252|KPCA_HUMAN;sp|P05771|KPCB_HUMAN	24.5046	24.5175	24.3086	NaN	NaN	NaN	NaN	NaN	NaN	4	4	4	8.6	8.6	8.6	76.749	0	24.558	627950000	19	sp|P17252|KPCA_HUMAN
sp|P17655|CAN2_HUMAN	28.0018	27.3211	26.5475	27.7847	27.3414	26.8767	NaN	NaN	NaN	20	20	20	44.6	44.6	44.6	79.994	0	323.31	9022500000	273	sp|P17655|CAN2_HUMAN
sp|P17844|DDX5_HUMAN	27.1629	27.8345	25.5847	26.5503	25.3526	25.484	NaN	NaN	27.226	21	21	17	34.5	34.5	31.1	69.147	0	323.31	5631600000	128	sp|P17844|DDX5_HUMAN
sp|P17858|PFKAL_HUMAN	27.6939	27.4727	24.5086	26.8876	26.9326	27.2695	NaN	NaN	NaN	19	19	17	36.4	36.4	34.1	85.018	0	323.31	7364700000	137	sp|P17858|PFKAL_HUMAN
sp|P17931|LEG3_HUMAN	27.7877	26.9954	27.9076	27.4401	28.251	27.291	NaN	NaN	NaN	6	6	6	30.8	30.8	30.8	26.152	0	194.61	10822000000	118	sp|P17931|LEG3_HUMAN
sp|P17980|PRS6A_HUMAN	25.3083	26.2762	25.3231	25.2315	25.2551	25.5554	NaN	NaN	NaN	8	8	8	25.5	25.5	25.5	49.203	0	95.382	2601400000	94	sp|P17980|PRS6A_HUMAN
sp|P17987|TCPA_HUMAN	29.5148	29.4955	28.0422	28.9776	28.5841	29.2717	NaN	NaN	28.7399	36	36	36	73.2	73.2	73.2	60.343	0	323.31	31629000000	522	sp|P17987|TCPA_HUMAN
sp|P18077|RL35A_HUMAN	25.9124	27.1352	26.1871	26.5193	25.416	25.0689	NaN	NaN	NaN	9	9	9	46.4	46.4	46.4	12.538	0	89.711	5117500000	70	sp|P18077|RL35A_HUMAN
sp|P18085|ARF4_HUMAN	27.3669	26.1316	26.5075	27.1079	NaN	27.0444	NaN	NaN	NaN	14	14	9	74.4	74.4	44.4	20.511	0	323.31	6441400000	162	sp|P18085|ARF4_HUMAN
sp|P18124|RL7_HUMAN	31.1498	30.6838	30.1822	29.3388	29.3591	29.4904	NaN	NaN	28.1429	34	34	34	71	71	71	29.225	0	323.31	64938000000	662	sp|P18124|RL7_HUMAN
sp|P18206|VINC_HUMAN	28.9913	24.4704	27.2161	25.4016	29.2999	30.7031	NaN	NaN	26.9354	47	47	47	49.9	49.9	49.9	123.8	0	323.31	19872000000	329	sp|P18206|VINC_HUMAN
sp|P18621|RL17_HUMAN	28.3304	28.1707	27.937	27.2176	26.4727	27.1257	NaN	NaN	NaN	20	20	20	65.2	65.2	65.2	21.397	0	323.31	13471000000	199	sp|P18621|RL17_HUMAN
sp|P18669|PGAM1_HUMAN;sp|Q8N0Y7|PGAM4_HUMAN;sp|P15259|PGAM2_HUMAN	29.6683	30.2057	29.9769	30.3726	29.2577	30.4182	NaN	NaN	30.0335	25	25	25	89.4	89.4	89.4	28.804	0	323.31	65721000000	762	sp|P18669|PGAM1_HUMAN
sp|P19338|NUCL_HUMAN	30.9917	30.8175	30.8701	30.3623	30.4358	30.4788	NaN	NaN	31.6534	45	45	45	49.7	49.7	49.7	76.613	0	323.31	92322000000	1245	sp|P19338|NUCL_HUMAN
sp|P19367|HXK1_HUMAN;sp|Q2TB90|HKDC1_HUMAN;sp|P52789|HXK2_HUMAN	26.8064	25.5447	25.0317	25.264	25.6821	24.7498	NaN	NaN	NaN	12	12	12	19.1	19.1	19.1	102.48	0	260.06	2615700000	58	sp|P19367|HXK1_HUMAN
sp|P19623|SPEE_HUMAN	27.7429	26.6192	26.4116	27.0653	25.5759	26.7532	NaN	NaN	25.3172	12	12	12	33.4	33.4	33.4	33.824	0	155.37	6512000000	132	sp|P19623|SPEE_HUMAN
sp|P20290|BTF3_HUMAN	27.2969	27.1741	27.7679	27.0718	NaN	NaN	NaN	NaN	NaN	9	9	9	61.7	61.7	61.7	22.168	0	323.31	7368100000	109	sp|P20290|BTF3_HUMAN
sp|P20340|RAB6A_HUMAN;sp|Q9NRW1|RAB6B_HUMAN;sp|Q53S08|RAB6D_HUMAN	26.7153	26.8184	27.2096	26.7238	26.5882	26.7376	NaN	NaN	NaN	8	8	6	32.2	32.2	26	23.593	0	106.68	7648000000	76	sp|P20340|RAB6A_HUMAN;sp|Q9NRW1|RAB6B_HUMAN
sp|P20618|PSB1_HUMAN	28.3435	27.7503	27.1112	28.1676	27.3912	27.5095	NaN	NaN	27.6162	19	19	19	72.6	72.6	72.6	26.489	0	323.31	14094000000	284	sp|P20618|PSB1_HUMAN
sp|P21281|VATB2_HUMAN;sp|P15313|VATB1_HUMAN	24.8778	25.5611	25.6444	NaN	25.6135	25.2971	NaN	NaN	NaN	10	10	10	28.4	28.4	28.4	56.5	0	165.69	1859700000	66	sp|P21281|VATB2_HUMAN
sp|P21333|FLNA_HUMAN	31.8528	32.0395	32.9614	32.4764	33.0066	32.3714	NaN	NaN	26.0964	165	150	147	64.7	62.2	61.2	280.74	0	323.31	236550000000	2838	sp|P21333|FLNA_HUMAN
sp|P21399|ACOC_HUMAN	27.1329	26.5301	24.1101	26.2876	27.5416	25.9378	NaN	NaN	NaN	17	17	17	31.6	31.6	31.6	98.398	0	289.04	5000300000	132	sp|P21399|ACOC_HUMAN
sp|P21589|5NTD_HUMAN	24.8839	25.0899	25.251	25.1553	25.4165	24.6424	NaN	NaN	NaN	10	10	10	27.4	27.4	27.4	63.367	0	44.924	1597700000	60	sp|P21589|5NTD_HUMAN
sp|P21926|CD9_HUMAN	25.6711	26.1604	26.8552	27.0757	26.9192	25.2633	NaN	NaN	NaN	7	7	7	26.3	26.3	26.3	25.416	0	224.27	5342100000	120	sp|P21926|CD9_HUMAN
sp|P21964|COMT_HUMAN	24.4134	24.1389	25.4494	25.1849	24.6494	NaN	NaN	NaN	NaN	5	5	5	24.4	24.4	24.4	30.037	0	156.04	1504400000	52	sp|P21964|COMT_HUMAN
sp|P22061|PIMT_HUMAN	26.1854	25.5173	25.6116	26.0256	26.4377	26.2516	NaN	NaN	NaN	8	8	8	57.7	57.7	57.7	24.636	0	323.31	3995800000	87	sp|P22061|PIMT_HUMAN
sp|P22102|PUR2_HUMAN	27.0304	26.5856	26.3694	26.4776	26.1845	26.1415	NaN	NaN	NaN	18	18	18	25.6	25.6	25.6	107.77	0	287.28	4603400000	151	sp|P22102|PUR2_HUMAN
sp|P22234|PUR6_HUMAN	27.5036	28.1022	27.7554	28.7416	28.16	28.0502	NaN	NaN	27.9048	21	21	21	60	60	60	47.079	0	323.31	15322000000	300	sp|P22234|PUR6_HUMAN
sp|P22314|UBA1_HUMAN	31.3404	30.1273	30.6308	30.2723	30.8698	30.7139	NaN	NaN	31.6284	59	59	59	67	67	67	117.85	0	323.31	90968000000	1334	sp|P22314|UBA1_HUMAN
sp|P22392|NDKB_HUMAN;sp|O60361|NDK8_HUMAN	30.8792	30.65	31.2033	30.6479	30.2755	31.5925	NaN	NaN	31.1917	21	21	14	88.8	88.8	53.3	17.298	0	323.31	127720000000	695	sp|P22392|NDKB_HUMAN
sp|P22626|ROA2_HUMAN	28.4482	27.7989	27.8773	27.3426	25.9858	27.7371	NaN	NaN	28.842	22	22	22	43.9	43.9	43.9	37.429	0	323.31	12764000000	321	sp|P22626|ROA2_HUMAN
sp|P22694|KAPCB_HUMAN	24.4228	24.6354	25.213	24.6072	25.12	24.9743	NaN	NaN	NaN	7	7	2	17.4	17.4	7.4	40.622	0	46.105	1540800000	40	sp|P22694|KAPCB_HUMAN
sp|P23246|SFPQ_HUMAN	28.2641	28.7105	27.5852	27.9947	27.2992	27.1561	NaN	NaN	28.4835	17	17	16	26.4	26.4	26.4	76.149	0	323.31	12798000000	216	sp|P23246|SFPQ_HUMAN
sp|P23284|PPIB_HUMAN	29.0319	29.2926	31.6934	29.8762	31.3685	29.4918	NaN	NaN	25.7766	27	27	27	75	75	75	23.742	0	323.31	82092000000	581	sp|P23284|PPIB_HUMAN
sp|P23381|SYWC_HUMAN	27.9485	28.0401	28.4109	27.548	29.0133	27.8351	NaN	NaN	26.3002	16	16	16	51.2	51.2	51.2	53.165	0	323.31	14743000000	311	sp|P23381|SYWC_HUMAN
sp|P23396|RS3_HUMAN	31.0354	30.7275	30.2115	30.1267	29.9997	30.1041	NaN	NaN	29.6482	43	43	43	91.8	91.8	91.8	26.688	0	323.31	80099000000	914	sp|P23396|RS3_HUMAN
sp|P23526|SAHH_HUMAN	28.0272	27.3979	27.3233	28.0154	27.9649	28.0425	NaN	NaN	28.5534	19	19	19	39.4	39.4	39.4	47.716	0	265.02	12853000000	212	sp|P23526|SAHH_HUMAN
sp|P23528|COF1_HUMAN	31.5709	31.2557	31.0723	31.6586	30.8191	31.2793	NaN	NaN	30.2901	32	32	23	98.8	98.8	71.7	18.502	0	323.31	172740000000	1305	sp|P23528|COF1_HUMAN
sp|P23919|KTHY_HUMAN	26.6224	25.4963	26.0301	25.6226	NaN	25.5947	NaN	NaN	NaN	15	15	15	65.6	65.6	65.6	23.819	0	199.98	3153800000	79	sp|P23919|KTHY_HUMAN
sp|P24534|EF1B_HUMAN	28.279	28.458	26.3863	27.5982	25.9343	27.7509	NaN	NaN	NaN	14	12	12	57.8	53.8	53.8	24.763	0	290.74	11383000000	106	sp|P24534|EF1B_HUMAN
sp|P24666|PPAC_HUMAN	26.0958	25.4655	25.9004	26.3985	24.8849	26.931	NaN	NaN	NaN	9	9	9	70.3	70.3	70.3	18.042	0	296.02	4058500000	87	sp|P24666|PPAC_HUMAN
sp|P24752|THIL_HUMAN	24.0394	24.2874	26.4885	26.1564	26.3856	26.8441	NaN	NaN	27.1673	8	8	8	28.6	28.6	28.6	45.199	0	155.82	3843900000	91	sp|P24752|THIL_HUMAN
sp|P24821|TENA_HUMAN	27.284	23.5683	25.3631	23.3705	NaN	NaN	NaN	NaN	NaN	21	21	21	13.9	13.9	13.9	240.85	0	195.95	1497600000	88	sp|P24821|TENA_HUMAN
sp|P25205|MCM3_HUMAN	26.5819	26.3631	24.2526	NaN	NaN	22.4832	NaN	NaN	23.9754	16	16	16	27.2	27.2	27.2	90.98	0	129.86	1793900000	81	sp|P25205|MCM3_HUMAN
sp|P25325|THTM_HUMAN	25.3708	24.101	24.3115	NaN	NaN	NaN	NaN	NaN	24.7384	5	5	5	27.3	27.3	27.3	33.178	0	144.56	806980000	41	sp|P25325|THTM_HUMAN
sp|P25398|RS12_HUMAN	29.0156	29.502	29.1194	28.3857	28.3369	28.4261	NaN	NaN	25.4984	15	15	15	87.9	87.9	87.9	14.515	0	323.31	34200000000	343	sp|P25398|RS12_HUMAN
sp|P25786|PSA1_HUMAN	29.0653	28.5396	27.3922	28.3219	27.9242	28.6099	NaN	NaN	27.608	22	22	22	84	84	84	29.555	0	323.31	19408000000	215	sp|P25786|PSA1_HUMAN
sp|P25787|PSA2_HUMAN	28.3453	28.3496	27.5162	28.3876	26.2574	28.0653	NaN	NaN	25.7071	13	13	13	58.5	58.5	58.5	25.898	0	323.31	15973000000	304	sp|P25787|PSA2_HUMAN
sp|P25788|PSA3_HUMAN	28.4044	28.607	26.9278	28.53	26.3856	28.4618	NaN	NaN	25.429	14	14	14	60	60	60	28.433	0	308.76	16655000000	168	sp|P25788|PSA3_HUMAN
sp|P25789|PSA4_HUMAN	28.3714	27.812	26.5443	27.9556	25.667	27.1588	NaN	NaN	NaN	17	17	17	67.4	67.4	67.4	29.483	0	323.31	10205000000	164	sp|P25789|PSA4_HUMAN
sp|P26038|MOES_HUMAN	30.3474	30.2203	29.2929	29.6367	29.7239	30.1439	NaN	NaN	28.3011	44	44	30	66.2	66.2	52.7	67.819	0	323.31	54538000000	613	sp|P26038|MOES_HUMAN
sp|P26196|DDX6_HUMAN	25.3263	26.1397	25.4951	25.9041	NaN	24.7124	NaN	NaN	NaN	6	6	6	17.4	17.4	17.4	54.416	0	124.08	1996900000	46	sp|P26196|DDX6_HUMAN
sp|P26368|U2AF2_HUMAN	25.8375	26.7062	25.9259	26.3061	NaN	24.5293	NaN	NaN	NaN	3	3	3	9.3	9.3	9.3	53.5	0	170.96	2901400000	49	sp|P26368|U2AF2_HUMAN
sp|P26373|RL13_HUMAN	29.9622	30.2696	30.0392	28.9647	27.2636	28.8602	NaN	NaN	NaN	19	19	19	58.3	58.3	58.3	24.261	0	323.31	41912000000	293	sp|P26373|RL13_HUMAN
sp|P26440|IVD_HUMAN	NaN	NaN	NaN	24.4774	24.1592	24.0167	NaN	NaN	NaN	3	3	3	10.2	10.2	10.2	46.319	0	117.24	410080000	12	sp|P26440|IVD_HUMAN
sp|P26583|HMGB2_HUMAN	26.4629	26.427	25.1634	26.526	24.7328	25.6296	NaN	NaN	26.5599	5	4	4	25.4	22	22	24.033	0	100.15	4042900000	56	sp|P26583|HMGB2_HUMAN
sp|P26599|PTBP1_HUMAN;sp|O95758|PTBP3_HUMAN	28.3469	28.2768	27.9301	28.2769	27.5188	28.0711	NaN	NaN	28.8349	23	23	23	66.1	66.1	66.1	57.221	0	323.31	16027000000	383	sp|P26599|PTBP1_HUMAN
sp|P26639|SYTC_HUMAN;sp|A2RTX5|SYTC2_HUMAN	28.0222	27.7679	27.1465	27.3101	27.8598	27.4463	NaN	NaN	25.1413	23	23	22	37.1	37.1	36	83.434	0	323.31	10392000000	276	sp|P26639|SYTC_HUMAN
sp|P26640|SYVC_HUMAN	29.5197	27.0253	29.2001	30.3182	28.8619	30.3072	NaN	NaN	28.8988	46	46	46	45.2	45.2	45.2	140.47	0	323.31	33219000000	688	sp|P26640|SYVC_HUMAN
sp|P26641|EF1G_HUMAN	30.4356	31.2868	29.9974	30.5222	30.3454	30.5837	NaN	NaN	30.5248	38	38	38	77.6	77.6	77.6	50.118	0	323.31	86734000000	972	sp|P26641|EF1G_HUMAN
sp|P26885|FKBP2_HUMAN	NaN	24.854	25.3373	25.2942	25.8785	24.5552	NaN	NaN	NaN	4	4	4	31	31	31	15.649	0	16.428	2172000000	34	sp|P26885|FKBP2_HUMAN
sp|P27348|1433T_HUMAN	29.9875	30.6573	29.6953	30.3934	29.351	30.3982	NaN	NaN	29.0046	30	25	25	86.1	81.6	81.6	27.764	0	323.31	68368000000	608	sp|P27348|1433T_HUMAN
sp|P27635|RL10_HUMAN;sp|Q96L21|RL10L_HUMAN	27.9838	28.189	28.6513	26.838	27.8932	27.073	NaN	NaN	NaN	18	18	18	60.7	60.7	60.7	24.604	0	296.71	14749000000	199	sp|P27635|RL10_HUMAN
sp|P27695|APEX1_HUMAN	24.5289	25.091	25.4873	24.9392	NaN	NaN	NaN	NaN	NaN	6	6	6	40.6	40.6	40.6	35.554	0	184.03	1468700000	57	sp|P27695|APEX1_HUMAN
sp|P27708|PYR1_HUMAN	28.1153	28.0962	27.7702	28.314	27.9625	28.0422	NaN	NaN	26.6179	36	36	36	24.4	24.4	24.4	242.98	0	323.31	12315000000	309	sp|P27708|PYR1_HUMAN
sp|P27797|CALR_HUMAN	29.428	30.0113	31.5041	30.3411	32.3693	30.5023	30.1774	29.9606	30.5386	33	33	33	83	83	83	48.141	0	323.31	121350000000	1412	sp|P27797|CALR_HUMAN
sp|P27816|MAP4_HUMAN	27.8025	26.6546	29.5399	27.7695	27.5633	28.7368	NaN	NaN	NaN	38	38	38	47.6	47.6	47.6	121	0	323.31	13593000000	293	sp|P27816|MAP4_HUMAN
sp|P27824|CALX_HUMAN;sp|O14967|CLGN_HUMAN	26.2144	27.8407	31.0347	27.9449	31.3885	26.3529	NaN	NaN	NaN	34	34	34	60	60	60	67.567	0	323.31	38480000000	655	sp|P27824|CALX_HUMAN
sp|P28066|PSA5_HUMAN	27.4981	27.3702	26.5273	27.3754	26.4892	26.8633	NaN	NaN	NaN	10	10	10	50.2	50.2	50.2	26.411	0	234.53	8196800000	91	sp|P28066|PSA5_HUMAN
sp|P28070|PSB4_HUMAN	26.3936	25.4145	25.6194	25.3373	NaN	26.3671	NaN	NaN	NaN	9	9	9	29.9	29.9	29.9	29.204	0	177.77	3093600000	51	sp|P28070|PSB4_HUMAN
sp|P28074|PSB5_HUMAN	26.4737	26.4084	26.6224	25.5841	25.1395	25.8257	NaN	NaN	26.6798	11	11	11	47.1	47.1	47.1	28.48	0	323.31	4229600000	74	sp|P28074|PSB5_HUMAN
sp|P28161|GSTM2_HUMAN	24.4591	25.8547	23.7013	24.8079	NaN	25.4713	NaN	NaN	NaN	8	6	6	39	33	33	25.744	0	208.36	1687200000	50	sp|P28161|GSTM2_HUMAN
sp|P28482|MK01_HUMAN	25.1335	25.3565	25.6945	NaN	NaN	24.8905	NaN	NaN	NaN	10	10	9	44.4	44.4	40.8	41.389	0	169.13	1943600000	48	sp|P28482|MK01_HUMAN
sp|P28838|AMPL_HUMAN	28.2493	28.3154	27.9218	28.2839	28.1913	28.5258	NaN	NaN	26.4599	24	24	24	60.7	60.7	60.7	56.166	0	323.31	16686000000	356	sp|P28838|AMPL_HUMAN
sp|P29144|TPP2_HUMAN	25.7451	NaN	25.8693	26.1686	25.775	26.3553	NaN	NaN	NaN	17	17	17	19.5	19.5	19.5	138.35	0	127.81	2206000000	56	sp|P29144|TPP2_HUMAN
sp|P29401|TKT_HUMAN;sp|P51854|TKTL1_HUMAN	31.4613	31.5144	31.4582	30.3804	30.595	30.8364	NaN	NaN	30.1667	53	53	53	79.8	79.8	79.8	67.877	0	323.31	115300000000	1389	sp|P29401|TKT_HUMAN
sp|P29692|EF1D_HUMAN	30.4766	29.5844	29.3775	29.8605	29.0188	29.6628	NaN	NaN	27.87	20	20	18	58.4	58.4	55.2	31.121	0	323.31	47766000000	450	sp|P29692|EF1D_HUMAN
sp|P30040|ERP29_HUMAN	25.8947	27.203	27.9203	27.5178	27.4529	27.4265	NaN	NaN	24.6058	11	11	11	44.8	44.8	44.8	28.993	0	138.25	9363600000	186	sp|P30040|ERP29_HUMAN
sp|P30041|PRDX6_HUMAN	30.4932	30.2089	29.4111	30.7239	29.7853	30.6299	NaN	NaN	28.0275	33	33	33	89.3	89.3	89.3	25.035	0	323.31	76943000000	899	sp|P30041|PRDX6_HUMAN
sp|P30042|ES1_HUMAN	25.8901	NaN	26.4458	26.4947	26.09	26.4156	NaN	NaN	NaN	6	6	6	35.1	35.1	35.1	28.17	0	261.78	4051600000	69	sp|P30042|ES1_HUMAN
sp|P30044|PRDX5_HUMAN	29.3987	28.2753	29.0513	28.7094	28.9142	28.9333	NaN	NaN	NaN	15	15	15	57.9	57.9	57.9	22.086	0	323.31	31990000000	378	sp|P30044|PRDX5_HUMAN
sp|P30046|DOPD_HUMAN;sp|A6NHG4|DDTL_HUMAN	25.3507	26.5193	26.2895	26.8455	26.2082	26.1414	NaN	NaN	NaN	8	8	8	56.8	56.8	56.8	12.712	0	233.11	5724400000	95	sp|P30046|DOPD_HUMAN;sp|A6NHG4|DDTL_HUMAN
sp|P30048|PRDX3_HUMAN	25.0544	25.2257	26.6672	26.7493	25.2401	26.4375	NaN	NaN	27.3288	8	8	8	35.9	35.9	35.9	27.692	0	264.69	4046700000	101	sp|P30048|PRDX3_HUMAN
sp|P30050|RL12_HUMAN	29.1572	29.1967	29.5309	28.757	28.6383	28.015	NaN	NaN	28.7645	13	13	13	76.4	76.4	76.4	17.818	0	323.31	32163000000	380	sp|P30050|RL12_HUMAN
sp|P30084|ECHM_HUMAN	23.328	24.2919	24.7898	26.2063	24.0792	24.0589	NaN	NaN	NaN	5	5	5	24.5	24.5	24.5	31.387	0	228.97	1690400000	73	sp|P30084|ECHM_HUMAN
sp|P30085|KCY_HUMAN	27.3447	26.7461	26.6642	27.8091	25.8829	27.0692	NaN	NaN	26.8328	11	11	11	67.3	67.3	67.3	22.222	0	226.01	8439500000	130	sp|P30085|KCY_HUMAN
sp|P30086|PEBP1_HUMAN	30.243	30.0624	30.1174	30.3679	30.3375	30.6251	NaN	NaN	29.3469	22	22	22	95.2	95.2	95.2	21.057	0	323.31	77171000000	784	sp|P30086|PEBP1_HUMAN
sp|P30101|PDIA3_HUMAN	29.6916	30.476	32.3969	30.7962	32.4919	30.8556	26.9457	26.0976	30.5638	55	55	55	79.2	79.2	79.2	56.782	0	323.31	136060000000	1631	sp|P30101|PDIA3_HUMAN
sp|P30153|2AAA_HUMAN;sp|P30154|2AAB_HUMAN	29.0455	28.8753	27.8441	28.8083	28.0598	28.8875	NaN	NaN	26.4513	30	30	30	60.4	60.4	60.4	65.308	0	323.31	23117000000	455	sp|P30153|2AAA_HUMAN
sp|P30626|SORCN_HUMAN	28.5169	27.631	27.846	27.7184	27.0807	27.7887	NaN	NaN	25.7667	12	12	12	57.6	57.6	57.6	21.676	0	174.48	13931000000	157	sp|P30626|SORCN_HUMAN
sp|P31150|GDIA_HUMAN	29.4712	29.4122	28.6259	29.2873	28.8574	29.8729	NaN	NaN	28.2653	38	38	28	83.4	83.4	69.6	50.582	0	323.31	37843000000	651	sp|P31150|GDIA_HUMAN
sp|P31153|METK2_HUMAN;sp|Q00266|METK1_HUMAN	27.1166	27.3316	28.1327	27.6962	27.8922	28.1997	NaN	NaN	26.4653	11	11	11	25.3	25.3	25.3	43.66	0	217.45	11337000000	149	sp|P31153|METK2_HUMAN
sp|P31689|DNJA1_HUMAN	26.0012	26.6891	26.9461	26.5363	25.9081	26.13	NaN	NaN	NaN	8	8	8	33	33	33	44.868	0	202.11	4532400000	92	sp|P31689|DNJA1_HUMAN
sp|P31939|PUR9_HUMAN	28.5804	28.6751	28.3032	28.6648	28.0205	28.4946	NaN	NaN	28.7836	25	25	25	59.3	59.3	59.3	64.615	0	323.31	20004000000	437	sp|P31939|PUR9_HUMAN
sp|P31942|HNRH3_HUMAN	23.575	23.8968	23.6413	24.5191	NaN	NaN	NaN	NaN	NaN	3	3	3	11.3	11.3	11.3	36.926	0	13.992	594030000	20	sp|P31942|HNRH3_HUMAN
sp|P31943|HNRH1_HUMAN	26.2635	28.0362	28.1754	27.3519	26.6534	26.9018	NaN	NaN	27.5746	9	9	3	23.6	23.6	11.1	49.229	0	299.41	9463300000	216	sp|P31943|HNRH1_HUMAN
sp|P31946|1433B_HUMAN	28.7878	28.6811	27.8688	28.6966	28.307	28.489	NaN	NaN	NaN	26	15	15	80.5	58.5	58.5	28.082	0	323.31	21935000000	263	sp|P31946|1433B_HUMAN
sp|P31948|STIP1_HUMAN	28.6844	28.7718	27.9703	28.2469	27.7669	28.3204	NaN	NaN	27.191	21	21	21	42.2	42.2	42.2	62.639	0	323.31	17712000000	291	sp|P31948|STIP1_HUMAN
sp|P31949|S10AB_HUMAN	27.4703	27.4923	26.5176	27.3146	26.8453	27.5284	NaN	NaN	NaN	14	14	14	86.7	86.7	86.7	11.74	0	323.31	10880000000	195	sp|P31949|S10AB_HUMAN
sp|P32119|PRDX2_HUMAN	30.0515	29.392	29.7491	30.4238	29.1781	30.0704	NaN	NaN	28.6694	26	25	25	91.9	91.9	91.9	21.892	0	323.31	62052000000	718	sp|P32119|PRDX2_HUMAN
sp|P32969|RL9_HUMAN	28.3367	28.3929	28.534	28.1161	26.4469	26.9402	NaN	NaN	NaN	18	18	18	82.8	82.8	82.8	21.863	0	259.4	15613000000	260	sp|P32969|RL9_HUMAN
sp|P33176|KINH_HUMAN	26.5779	23.9535	24.7413	23.9237	25.1957	25.1027	NaN	NaN	NaN	13	13	10	19.3	19.3	15.6	109.68	0	215.54	1881700000	69	sp|P33176|KINH_HUMAN
sp|P33316|DUT_HUMAN	24.1312	25.0854	25.1943	NaN	NaN	NaN	NaN	NaN	NaN	5	5	5	23	23	23	26.563	0	224.14	912580000	39	sp|P33316|DUT_HUMAN
sp|P33991|MCM4_HUMAN	25.9516	26.0014	25.0196	NaN	NaN	NaN	NaN	NaN	NaN	9	9	9	16.5	16.5	16.5	96.557	0	150.68	1363200000	53	sp|P33991|MCM4_HUMAN
sp|P33992|MCM5_HUMAN	24.5658	25.0433	24.9172	NaN	NaN	NaN	NaN	NaN	NaN	5	5	5	8.3	8.3	8.3	82.285	0	25.025	771700000	22	sp|P33992|MCM5_HUMAN
sp|P33993|MCM7_HUMAN	26.4131	26.914	27.2322	NaN	NaN	NaN	NaN	NaN	25.9328	17	17	17	34.1	34.1	34.1	81.307	0	222.69	3602200000	100	sp|P33993|MCM7_HUMAN
sp|P34897|GLYM_HUMAN	25.4861	25.7116	27.0251	27.0782	26.5832	27.2338	NaN	NaN	28.0807	19	19	19	50.4	50.4	50.4	55.992	0	323.31	6352200000	127	sp|P34897|GLYM_HUMAN
sp|P34932|HSP74_HUMAN	29.3718	28.8353	28.2411	27.9398	28.7988	28.515	NaN	NaN	26.6039	39	36	36	48.2	45.6	45.6	94.33	0	323.31	21454000000	412	sp|P34932|HSP74_HUMAN
sp|P35080|PROF2_HUMAN	26.7648	27.9104	25.7996	28.1253	26.8201	27.4943	NaN	NaN	NaN	9	9	9	54.3	54.3	54.3	15.046	0	187.65	11185000000	99	sp|P35080|PROF2_HUMAN
sp|P35222|CTNB1_HUMAN	NaN	25.2253	26.376	25.4523	24.4072	23.8623	NaN	NaN	NaN	9	7	7	18.6	16.3	16.3	85.496	0	178.83	1390500000	31	sp|P35222|CTNB1_HUMAN
sp|P35232|PHB_HUMAN	23.8581	23.5231	27.0471	25.6143	24.8331	NaN	NaN	NaN	NaN	9	9	9	62.9	62.9	62.9	29.804	0	101.44	2168500000	83	sp|P35232|PHB_HUMAN
sp|P35237|SPB6_HUMAN	26.7757	26.0333	26.3563	27.4814	27.0383	27.4109	NaN	NaN	NaN	12	12	12	42.6	42.6	42.6	42.621	0	323.31	6099300000	137	sp|P35237|SPB6_HUMAN
sp|P35241|RADI_HUMAN	27.4249	27.6011	NaN	26.7244	27.3198	27.2222	NaN	NaN	NaN	36	22	20	53.7	40.3	37.9	68.563	0	323.31	9382400000	256	sp|P35241|RADI_HUMAN
sp|P35268|RL22_HUMAN	29.1322	29.4007	29.7979	29.1521	28.881	29.7209	NaN	NaN	28.2946	10	10	8	60.9	60.9	53.9	14.787	0	244.79	45364000000	350	sp|P35268|RL22_HUMAN
sp|P35270|SPRE_HUMAN	22.4676	23.2624	22.6748	24.1762	NaN	23.4385	NaN	NaN	NaN	5	5	5	26.1	26.1	26.1	28.048	0	111.3	537520000	44	sp|P35270|SPRE_HUMAN
sp|P35579|MYH9_HUMAN;REV__sp|Q9UKV3|ACINU_HUMAN	31.4398	32.8106	31.7533	32.4961	32.024	32.3209	NaN	NaN	28.4611	146	146	124	65.6	65.6	61	226.53	0	323.31	209750000000	2461	sp|P35579|MYH9_HUMAN
sp|P35580|MYH10_HUMAN	28.2995	29.7293	29.2557	29.6292	29.4605	29.01	NaN	NaN	27.0288	72	55	49	35.1	30.1	27.2	229	0	323.31	28586000000	533	sp|P35580|MYH10_HUMAN
sp|P35606|COPB2_HUMAN	26.7781	26.9983	26.2439	26.1482	26.6339	26.214	NaN	NaN	NaN	22	22	22	35.1	35.1	35.1	102.49	0	280.92	4982000000	102	sp|P35606|COPB2_HUMAN
sp|P35637|FUS_HUMAN	26.2676	27.1961	26.9565	26.6886	23.4583	NaN	NaN	NaN	NaN	3	3	2	7	7	4.4	53.425	0	92.287	3623100000	91	sp|P35637|FUS_HUMAN
sp|P35908|K22E_HUMAN	30.6022	31.3656	30.6575	31.3919	31.9108	31.5278	33.6991	33.728	32.8605	48	45	1	74	71.5	4.7	65.432	0	323.31	166650000000	2187	sp|P35908|K22E_HUMAN
sp|P35998|PRS7_HUMAN	25.8519	27.0178	25.2172	26.266	25.1215	26.7464	NaN	NaN	NaN	15	15	15	49.2	49.2	49.2	48.633	0	203.37	4187000000	101	sp|P35998|PRS7_HUMAN
sp|P36222|CH3L1_HUMAN	24.9822	26.4519	27.8285	27.5391	27.4846	27.7654	NaN	NaN	NaN	14	14	14	41.8	41.8	41.8	42.625	0	323.31	7423400000	185	sp|P36222|CH3L1_HUMAN
sp|P36543|VATE1_HUMAN;sp|Q96A05|VATE2_HUMAN	25.5192	25.2665	25.2494	24.9472	NaN	NaN	NaN	NaN	NaN	6	6	6	21.2	21.2	21.2	26.145	0	112.29	1462700000	35	sp|P36543|VATE1_HUMAN
sp|P36578|RL4_HUMAN	28.8674	30.0648	30.3557	29.7962	29.3564	28.9356	NaN	NaN	26.9852	36	36	36	58.5	58.5	58.5	47.697	0	323.31	39223000000	511	sp|P36578|RL4_HUMAN
sp|P36776|LONM_HUMAN	24.2996	23.9674	24.9803	NaN	23.6394	NaN	NaN	NaN	NaN	6	6	6	10.7	10.7	10.7	106.49	0	34.5	524100000	32	sp|P36776|LONM_HUMAN
sp|P36871|PGM1_HUMAN	27.341	27.2882	26.312	27.3912	27.3843	27.751	NaN	NaN	NaN	24	24	24	65.7	65.7	65.7	61.448	0	323.31	9453400000	226	sp|P36871|PGM1_HUMAN
sp|P37108|SRP14_HUMAN	26.2771	25.5536	26.5325	26.7877	25.9248	25.8922	NaN	NaN	NaN	7	7	7	44.1	44.1	44.1	14.57	0	170.15	4650400000	75	sp|P37108|SRP14_HUMAN
sp|P37802|TAGL2_HUMAN	28.314	27.3577	26.5556	28.4955	27.5416	27.8179	NaN	NaN	NaN	25	25	25	87.9	87.9	87.9	22.391	0	323.31	14425000000	416	sp|P37802|TAGL2_HUMAN
sp|P37837|TALDO_HUMAN	29.3327	28.6638	28.9679	28.4561	27.9458	29.1388	NaN	NaN	28.588	21	21	21	50.4	50.4	50.4	37.54	0	299.39	25303000000	294	sp|P37837|TALDO_HUMAN
sp|P38117|ETFB_HUMAN	23.707	24.3649	25.2176	NaN	NaN	NaN	NaN	NaN	NaN	6	6	6	29	29	29	27.843	0	12.956	962090000	20	sp|P38117|ETFB_HUMAN
sp|P38159|RBMX_HUMAN;sp|Q96E39|RMXL1_HUMAN;sp|O75526|RMXL2_HUMAN;sp|Q8N7X1|RMXL3_HUMAN	25.3544	25.589	25.4465	24.402	NaN	NaN	NaN	NaN	25.9383	5	5	5	14.1	14.1	14.1	42.331	0	122.07	1873600000	44	sp|P38159|RBMX_HUMAN;sp|Q96E39|RMXL1_HUMAN
sp|P38606|VATA_HUMAN	26.6384	26.76	26.6858	26.0736	26.661	26.1934	NaN	NaN	NaN	16	16	16	45.2	45.2	45.2	68.303	0	323.31	4585300000	145	sp|P38606|VATA_HUMAN
sp|P38646|GRP75_HUMAN	28.2724	28.3915	29.3014	28.0322	28.4276	28.5724	NaN	NaN	29.1905	25	24	24	40.4	40.4	40.4	73.68	0	323.31	18962000000	312	sp|P38646|GRP75_HUMAN
sp|P39019|RS19_HUMAN	29.4686	29.8988	30.3225	29.1834	28.836	29.7501	NaN	NaN	28.8412	20	20	20	61.4	61.4	61.4	16.06	0	292.46	51399000000	361	sp|P39019|RS19_HUMAN
sp|P39023|RL3_HUMAN;sp|Q92901|RL3L_HUMAN	26.5532	28.2802	28.3845	27.3988	28.0749	27.5707	NaN	NaN	27.2177	17	17	17	38	38	38	46.108	0	240.53	12021000000	146	sp|P39023|RL3_HUMAN
sp|P39687|AN32A_HUMAN;sp|O43423|AN32C_HUMAN;sp|O95626|AN32D_HUMAN	29.0631	28.3865	28.1109	27.899	27.2079	28.4735	NaN	NaN	28.7445	14	14	11	53.4	53.4	50.6	28.585	0	323.31	18258000000	238	sp|P39687|AN32A_HUMAN
sp|P40227|TCPZ_HUMAN	29.9442	29.945	28.8731	29.8699	28.6434	29.6605	NaN	NaN	28.4867	32	32	29	59.5	59.5	55.7	58.024	0	323.31	42672000000	711	sp|P40227|TCPZ_HUMAN
sp|P40429|RL13A_HUMAN;sp|Q6NVV1|R13P3_HUMAN	28.6274	28.746	28.5456	28.0842	26.1702	27.4347	NaN	NaN	25.3155	16	16	16	55.2	55.2	55.2	23.577	0	323.31	17794000000	220	sp|P40429|RL13A_HUMAN
sp|P40763|STAT3_HUMAN	24.5443	24.7008	24.4867	NaN	NaN	NaN	NaN	NaN	NaN	6	6	6	13.8	13.8	13.8	88.067	0	95.282	873830000	31	sp|P40763|STAT3_HUMAN
sp|P40925|MDHC_HUMAN	29.9144	28.8445	28.7966	29.3923	29.1555	29.2436	NaN	NaN	28.7337	24	24	24	64.1	64.1	64.1	36.426	0	323.31	34984000000	362	sp|P40925|MDHC_HUMAN
sp|P40926|MDHM_HUMAN	30.6173	29.8754	30.2514	31.0026	30.8726	31.2863	26.0898	25.775	30.3573	38	38	38	76	76	76	35.503	0	323.31	99732000000	959	sp|P40926|MDHM_HUMAN
sp|P41091|IF2G_HUMAN;sp|Q2VIR3|IF2GL_HUMAN	26.9626	27.3657	NaN	26.2128	25.4719	25.8483	NaN	NaN	26.2285	15	15	15	41.5	41.5	41.5	51.109	0	302.88	4819800000	80	sp|P41091|IF2G_HUMAN;sp|Q2VIR3|IF2GL_HUMAN
sp|P41223|BUD31_HUMAN	24.3647	24.1225	23.4796	NaN	NaN	NaN	NaN	NaN	NaN	6	6	6	36.8	36.8	36.8	17	0	44.413	524610000	29	sp|P41223|BUD31_HUMAN
sp|P41250|GARS_HUMAN	29.3935	28.8807	28.7227	28.3532	29.4289	28.9923	NaN	NaN	27.5158	35	35	35	57.4	57.4	57.4	83.165	0	323.31	28835000000	523	sp|P41250|GARS_HUMAN
sp|P41252|SYIC_HUMAN	29.6157	27.1466	29.3342	30.5247	29.5047	30.1809	NaN	NaN	26.0311	65	65	65	54.5	54.5	54.5	144.5	0	323.31	37030000000	827	sp|P41252|SYIC_HUMAN
sp|P41567|EIF1_HUMAN	27.2188	26.9273	25.6647	26.9234	25.6054	26.3223	NaN	NaN	NaN	11	11	6	85	85	49.6	12.732	0	323.31	6724900000	140	sp|P41567|EIF1_HUMAN
sp|P42126|ECI1_HUMAN	25.3688	26.3381	25.8571	26.9549	25.878	27.0175	NaN	NaN	NaN	7	7	7	25.5	25.5	25.5	32.816	0	323.31	4725500000	83	sp|P42126|ECI1_HUMAN
sp|P42224|STAT1_HUMAN	24.7867	25.361	25.2665	NaN	25.535	25.088	NaN	NaN	NaN	7	7	7	14.3	14.3	14.3	87.334	0	96.042	1793700000	46	sp|P42224|STAT1_HUMAN
sp|P42677|RS27_HUMAN	27.0071	28.3807	26.1842	27.0042	25.7717	27.1404	NaN	NaN	NaN	8	8	4	48.8	48.8	20.2	9.461	0	104.79	10339000000	123	sp|P42677|RS27_HUMAN
sp|P42766|RL35_HUMAN	28.3353	28.5309	28.9769	26.7867	25.207	27.646	NaN	NaN	NaN	9	9	9	43.1	43.1	43.1	14.551	0	288.26	15741000000	157	sp|P42766|RL35_HUMAN
sp|P42771|CDN2A_HUMAN;sp|P42772|CDN2B_HUMAN	23.6118	23.5742	27.1275	NaN	NaN	NaN	NaN	NaN	NaN	5	5	5	50.6	50.6	50.6	16.532	0	239.45	1685700000	36	sp|P42771|CDN2A_HUMAN
sp|P43243|MATR3_HUMAN	24.8411	24.335	25.0712	NaN	24.3168	NaN	NaN	NaN	26.2183	7	7	7	16.1	16.1	16.1	94.622	0	71.755	993520000	51	sp|P43243|MATR3_HUMAN
sp|P43487|RANG_HUMAN	27.9107	27.7325	26.3754	26.895	NaN	26.6312	NaN	NaN	26.7446	8	8	8	46.8	46.8	46.8	23.31	0	315.18	7847100000	144	sp|P43487|RANG_HUMAN
sp|P43490|NAMPT_HUMAN	29.2751	29.2719	27.2871	29.4624	28.6362	29.5851	NaN	NaN	NaN	33	33	33	73.3	73.3	73.3	55.52	0	323.31	31644000000	507	sp|P43490|NAMPT_HUMAN
sp|P43686|PRS6B_HUMAN	27.3929	28.7525	26.1895	27.909	27.3383	27.9101	NaN	NaN	27.0718	23	23	23	66	66	66	47.366	0	323.31	12718000000	299	sp|P43686|PRS6B_HUMAN
sp|P45974|UBP5_HUMAN	28.9297	28.2526	28.0056	27.8908	27.7367	27.8875	NaN	NaN	25.1914	25	25	23	40.7	40.7	39.5	95.785	0	323.31	15370000000	391	sp|P45974|UBP5_HUMAN
sp|P46060|RAGP1_HUMAN	26.8708	26.7239	25.9054	NaN	24.8286	25.0706	NaN	NaN	NaN	13	13	13	32.7	32.7	32.7	63.541	0	323.31	3031100000	90	sp|P46060|RAGP1_HUMAN
sp|P46108|CRK_HUMAN	24.7641	25.4104	25.1928	25.4157	NaN	25.592	NaN	NaN	NaN	9	9	9	30.6	30.6	30.6	33.83	0	163.32	2076400000	56	sp|P46108|CRK_HUMAN
sp|P46379|BAG6_HUMAN	24.8399	24.2689	23.6261	25.6543	24.9091	25.006	NaN	NaN	NaN	6	6	6	8.4	8.4	8.4	119.41	0	168.67	1326300000	53	sp|P46379|BAG6_HUMAN
sp|P46459|NSF_HUMAN	NaN	24.1972	25.3121	25.1756	26.3374	25.0195	NaN	NaN	NaN	11	11	11	17.3	17.3	17.3	82.593	0	145.87	1701400000	51	sp|P46459|NSF_HUMAN
sp|P46776|RL27A_HUMAN	28.4947	28.6967	28.896	27.8176	26.2792	27.4028	NaN	NaN	25.4786	9	9	9	50.7	50.7	50.7	16.561	0	323.31	17749000000	199	sp|P46776|RL27A_HUMAN
sp|P46777|RL5_HUMAN	30.0605	29.1853	29.5677	28.783	28.4725	28.4529	NaN	NaN	28.0576	22	22	22	56.9	56.9	56.9	34.362	0	323.31	34018000000	404	sp|P46777|RL5_HUMAN
sp|P46778|RL21_HUMAN	28.2102	28.3046	28.8618	27.4729	26.6468	26.7792	NaN	NaN	26.5589	15	15	15	66.2	66.2	66.2	18.565	0	187.2	15145000000	156	sp|P46778|RL21_HUMAN
sp|P46779|RL28_HUMAN	26.6359	27.1904	26.8856	24.9688	NaN	26.0079	NaN	NaN	NaN	17	17	17	70.8	70.8	70.8	15.747	0	107.04	4807600000	77	sp|P46779|RL28_HUMAN
sp|P46781|RS9_HUMAN	29.763	29.6965	30.3461	29.0219	28.254	28.7457	NaN	NaN	27.1532	29	29	29	68	68	68	22.591	0	323.31	43290000000	368	sp|P46781|RS9_HUMAN
sp|P46782|RS5_HUMAN	29.2254	29.1096	29.1754	28.7718	28.5066	28.6615	NaN	NaN	27.5359	24	24	24	76.5	76.5	76.5	22.876	0	323.31	33309000000	491	sp|P46782|RS5_HUMAN
sp|P46783|RS10_HUMAN;sp|Q9NQ39|RS10L_HUMAN	28.1279	27.888	28.0352	27.7256	27.2054	26.9781	NaN	NaN	26.3022	16	16	16	79.4	79.4	79.4	18.898	0	289.79	14219000000	294	sp|P46783|RS10_HUMAN
sp|P46821|MAP1B_HUMAN	31.7533	31.7018	31.7529	31.7768	31.4883	31.6688	NaN	NaN	25.9422	117	117	115	56.3	56.3	55.9	270.63	0	323.31	139500000000	2197	sp|P46821|MAP1B_HUMAN
sp|P46926|GNPI1_HUMAN	26.4061	25.9263	25.8411	26.4906	26.1413	26.5253	NaN	NaN	NaN	11	11	8	57.4	57.4	47.4	32.668	0	240.04	4141200000	107	sp|P46926|GNPI1_HUMAN
sp|P46940|IQGA1_HUMAN;sp|Q86VI3|IQGA3_HUMAN	30.456	30.5532	31.002	31.3981	31.0635	31.4528	NaN	NaN	NaN	114	114	112	65	65	64	189.25	0	323.31	93640000000	1549	sp|P46940|IQGA1_HUMAN
sp|P47755|CAZA2_HUMAN	28.152	27.6836	27.6501	27.8959	27.8923	27.5206	NaN	NaN	NaN	17	17	12	71.7	71.7	59.1	32.949	0	323.31	12475000000	173	sp|P47755|CAZA2_HUMAN
sp|P47756|CAPZB_HUMAN	29.1851	27.9569	27.0408	28.3575	27.8908	27.763	NaN	NaN	NaN	16	16	16	59.9	59.9	59.9	31.35	0	323.31	15453000000	181	sp|P47756|CAPZB_HUMAN
sp|P47897|SYQ_HUMAN	27.4465	26.321	26.3968	26.2035	26.569	26.0659	NaN	NaN	NaN	22	22	22	33.5	33.5	33.5	87.798	0	323.31	5040200000	161	sp|P47897|SYQ_HUMAN
sp|P48147|PPCE_HUMAN	25.8334	25.6158	25.1035	25.8331	25.8073	25.7828	NaN	NaN	NaN	14	14	14	25.8	25.8	25.8	80.699	0	215.68	2761900000	90	sp|P48147|PPCE_HUMAN
sp|P48444|COPD_HUMAN	27.4172	27.0533	26.5169	26.7614	26.0861	26.458	NaN	NaN	NaN	17	17	17	42.7	42.7	42.7	57.21	0	160.24	5761400000	134	sp|P48444|COPD_HUMAN
sp|P48449|ERG7_HUMAN	NaN	24.8487	25.1552	25.2094	25.9167	24.2706	NaN	NaN	NaN	4	4	4	7.2	7.2	7.2	83.308	0	38.758	1452900000	35	sp|P48449|ERG7_HUMAN
sp|P48556|PSMD8_HUMAN	27.1822	27.1435	25.9585	26.5507	26.215	26.7628	NaN	NaN	NaN	13	13	13	33.1	33.1	33.1	39.611	0	141.11	5723500000	118	sp|P48556|PSMD8_HUMAN
sp|P48637|GSHB_HUMAN	26.3136	26.2485	25.819	26.1495	26.4195	25.6868	NaN	NaN	26.0807	11	11	11	35	35	35	52.384	0	268.55	3883700000	108	sp|P48637|GSHB_HUMAN
sp|P48643|TCPE_HUMAN	29.1406	29.4392	28.132	29.0787	28.1527	28.8626	NaN	NaN	28.2853	28	28	28	65.6	65.6	65.6	59.67	0	323.31	31351000000	563	sp|P48643|TCPE_HUMAN
sp|P48681|NEST_HUMAN	29.908	32.1662	32.757	32.9465	32.3502	32.6054	NaN	NaN	29.3592	116	116	116	57	57	57	177.44	0	323.31	229320000000	2562	sp|P48681|NEST_HUMAN
sp|P48735|IDHP_HUMAN	24.686	25.088	26.2002	25.6024	NaN	24.2873	NaN	NaN	25.5802	9	8	8	24.3	24.3	24.3	50.909	0	37.152	1855200000	60	sp|P48735|IDHP_HUMAN
sp|P49189|AL9A1_HUMAN	25.5876	25.7828	25.1364	25.7653	25.6338	26.2235	NaN	NaN	NaN	12	12	12	30.6	30.6	30.6	53.801	0	262.35	2973000000	84	sp|P49189|AL9A1_HUMAN
sp|P49207|RL34_HUMAN	26.5184	26.5403	26.9178	25.4776	25.8075	25.6785	NaN	NaN	NaN	9	9	9	42.7	42.7	42.7	13.293	0	42.904	4800200000	76	sp|P49207|RL34_HUMAN
sp|P49327|FAS_HUMAN	32.5727	33.0509	32.6911	33.0942	32.4361	32.8136	NaN	NaN	31.8424	172	172	172	70.6	70.6	70.6	273.42	0	323.31	323590000000	3967	sp|P49327|FAS_HUMAN
sp|P49368|TCPG_HUMAN	29.7486	29.7404	28.4317	29.4237	28.8347	29.8911	NaN	NaN	28.4216	43	43	43	72.8	72.8	72.8	60.533	0	323.31	39137000000	493	sp|P49368|TCPG_HUMAN
sp|P49411|EFTU_HUMAN	25.3535	26.0297	26.6036	NaN	25.6422	25.3812	NaN	NaN	26.6619	8	8	8	24.1	24.1	24.1	49.541	0	146.83	2450600000	85	sp|P49411|EFTU_HUMAN
sp|P49458|SRP09_HUMAN	25.6017	24.5602	24.9368	24.8035	NaN	NaN	NaN	NaN	NaN	3	3	3	34.9	34.9	34.9	10.112	0	123.47	1537400000	37	sp|P49458|SRP09_HUMAN
sp|P49588|SYAC_HUMAN	29.416	28.3444	28.7268	28.0626	29.0921	28.0975	NaN	NaN	26.0311	37	37	37	48.3	48.3	48.3	106.81	0	323.31	22286000000	489	sp|P49588|SYAC_HUMAN
sp|P49589|SYCC_HUMAN	26.9072	26.6427	24.9033	26.6693	27.3665	26.7439	NaN	NaN	NaN	13	13	13	21.7	21.7	21.7	85.472	0	256.54	5617700000	129	sp|P49589|SYCC_HUMAN
sp|P49591|SYSC_HUMAN	27.2013	27.4479	27.3233	27.5675	27.6672	27.3896	NaN	NaN	NaN	22	22	22	50.8	50.8	50.8	58.777	0	323.31	9379800000	218	sp|P49591|SYSC_HUMAN
sp|P49720|PSB3_HUMAN	27.022	27.2777	26.9731	27.2739	25.8803	26.9037	NaN	NaN	NaN	12	12	12	42	42	42	22.949	0	276.83	7725700000	149	sp|P49720|PSB3_HUMAN
sp|P49721|PSB2_HUMAN	28.3043	26.7789	26.8055	27.4902	26.3797	27.6469	NaN	NaN	26.5156	16	16	16	82.6	82.6	82.6	22.836	0	323.31	10454000000	214	sp|P49721|PSB2_HUMAN
sp|P49736|MCM2_HUMAN	25.4916	24.7017	25.4362	24.3961	NaN	NaN	NaN	NaN	25.1281	7	7	7	8.7	8.7	8.7	101.89	0	53.327	980830000	33	sp|P49736|MCM2_HUMAN
sp|P49755|TMEDA_HUMAN	NaN	24.9745	27.8921	25.724	27.2819	26.1032	NaN	NaN	NaN	7	7	7	30.1	30.1	30.1	24.976	0	222.81	5179600000	65	sp|P49755|TMEDA_HUMAN
sp|P49770|EI2BB_HUMAN	24.1051	24.2139	24.5555	NaN	NaN	24.7081	NaN	NaN	NaN	4	4	4	17.7	17.7	17.7	38.989	0	92.849	814220000	39	sp|P49770|EI2BB_HUMAN
sp|P49773|HINT1_HUMAN	29.7274	29.6874	27.9464	29.8738	28.7953	29.8253	NaN	NaN	24.7564	11	11	11	90.5	90.5	90.5	13.802	0	323.31	47864000000	306	sp|P49773|HINT1_HUMAN
sp|P49915|GUAA_HUMAN	26.7949	26.5772	25.4536	25.5968	NaN	25.7156	NaN	NaN	NaN	13	13	13	30.7	30.7	30.7	76.715	0	323.31	3257400000	111	sp|P49915|GUAA_HUMAN
sp|P50395|GDIB_HUMAN	26.4226	26.9197	26.8164	27.3465	26.247	27.2949	NaN	NaN	27.2053	29	19	19	66.1	52.1	52.1	50.663	0	323.31	6831800000	184	sp|P50395|GDIB_HUMAN
sp|P50454|SERPH_HUMAN	26.6054	27.7436	29.4349	28.7291	29.8034	27.0043	NaN	NaN	25.3026	19	19	19	62.7	62.7	62.7	46.44	0	323.31	18200000000	271	sp|P50454|SERPH_HUMAN
sp|P50502|F10A1_HUMAN;sp|Q8IZP2|ST134_HUMAN;sp|Q8NFI4|F10A5_HUMAN	27.1548	28.1388	27.5209	27.8831	27.6695	27.9772	NaN	NaN	28.4075	13	13	13	32.2	32.2	32.2	41.331	0	323.31	12962000000	168	sp|P50502|F10A1_HUMAN;sp|Q8IZP2|ST134_HUMAN;sp|Q8NFI4|F10A5_HUMAN
sp|P50570|DYN2_HUMAN;sp|Q05193|DYN1_HUMAN	26.1316	25.9528	25.5296	24.6786	25.6043	24.126	NaN	NaN	NaN	10	10	8	18.4	18.4	14.5	98.063	0	147.95	2173800000	71	sp|P50570|DYN2_HUMAN
sp|P50914|RL14_HUMAN	27.8241	28.8954	27.9047	27.8517	25.1361	26.5397	NaN	NaN	24.6222	10	10	10	37.2	37.2	37.2	23.432	0	108.88	12886000000	159	sp|P50914|RL14_HUMAN
sp|P50990|TCPQ_HUMAN	29.7145	29.9081	28.1771	29.4368	28.7499	29.5272	NaN	NaN	28.7353	36	36	36	61.3	61.3	61.3	59.62	0	323.31	37330000000	509	sp|P50990|TCPQ_HUMAN
sp|P50991|TCPD_HUMAN	29.5707	29.6535	27.8908	29.4043	28.486	29.5554	NaN	NaN	28.0002	39	39	39	67.2	67.2	67.2	57.924	0	323.31	35241000000	446	sp|P50991|TCPD_HUMAN
sp|P51114|FXR1_HUMAN	26.4267	26.5929	25.4393	25.6781	25.7172	NaN	NaN	NaN	NaN	6	6	4	11	11	7.6	69.72	0	129.61	2786000000	50	sp|P51114|FXR1_HUMAN
sp|P51148|RAB5C_HUMAN	25.9744	25.9797	26.4873	26.0835	25.6865	NaN	NaN	NaN	NaN	8	8	6	40.7	40.7	30.6	23.482	0	191.1	3566400000	52	sp|P51148|RAB5C_HUMAN
sp|P51149|RAB7A_HUMAN	26.9743	27.3979	29.1616	27.6532	28.346	27.0536	NaN	NaN	NaN	14	14	14	73.4	73.4	73.4	23.489	0	323.31	15077000000	219	sp|P51149|RAB7A_HUMAN
sp|P51665|PSMD7_HUMAN	24.9852	26.7879	27.1164	26.864	25.7591	27.5208	NaN	NaN	NaN	11	11	11	38	38	38	37.025	0	323.31	5478200000	113	sp|P51665|PSMD7_HUMAN
sp|P51858|HDGF_HUMAN	25.6567	26.2158	26.2026	26.2861	26.6706	26.8714	NaN	NaN	NaN	4	4	4	27.5	27.5	27.5	26.788	0	323.31	4195100000	84	sp|P51858|HDGF_HUMAN
sp|P52209|6PGD_HUMAN	28.0718	29.2566	28.9212	29.7448	29.6878	29.5309	NaN	NaN	28.8791	26	26	26	69.2	69.2	69.2	53.139	0	323.31	34992000000	527	sp|P52209|6PGD_HUMAN
sp|P52272|HNRPM_HUMAN	26.6799	27.337	26.5963	NaN	25.6751	25.0086	NaN	NaN	26.5802	10	10	10	15.2	15.2	15.2	77.515	0	196.65	4710700000	106	sp|P52272|HNRPM_HUMAN
sp|P52292|IMA1_HUMAN	26.7159	27.2436	25.6222	NaN	NaN	24.9698	NaN	NaN	NaN	12	12	12	40.6	40.6	40.6	57.861	0	257.42	3061400000	82	sp|P52292|IMA1_HUMAN
sp|P52306|GDS1_HUMAN	26.0978	24.675	24.4477	NaN	24.0292	24.4928	NaN	NaN	25.8355	7	7	7	19.8	19.8	19.8	66.316	0	241.29	1862900000	78	sp|P52306|GDS1_HUMAN
sp|P52565|GDIR1_HUMAN	29.2203	30.0387	29.4392	29.7406	29.0143	29.6697	NaN	NaN	29.1345	11	11	11	74	74	74	23.207	0	323.31	46463000000	321	sp|P52565|GDIR1_HUMAN
sp|P52597|HNRPF_HUMAN	24.809	24.9052	25.294	NaN	24.3865	24.3451	NaN	NaN	NaN	7	5	5	23.4	21	21	45.671	0	82.218	1334200000	60	sp|P52597|HNRPF_HUMAN
sp|P52788|SPSY_HUMAN	26.4974	24.2484	24.855	25.6487	NaN	25.5301	NaN	NaN	NaN	11	11	11	47.3	47.3	47.3	41.268	0	299.97	1974900000	77	sp|P52788|SPSY_HUMAN
sp|P52907|CAZA1_HUMAN	27.4771	27.2223	26.5039	27.5862	27.3324	27.2243	NaN	NaN	NaN	16	11	11	63.6	51	51	32.922	0	323.31	8273400000	126	sp|P52907|CAZA1_HUMAN
sp|P53004|BIEA_HUMAN	27.5058	26.894	27.1002	26.8881	27.5014	27.7803	NaN	NaN	NaN	17	17	17	52	52	52	33.428	0	323.31	8235600000	214	sp|P53004|BIEA_HUMAN
sp|P53396|ACLY_HUMAN	29.3465	28.0737	29.0013	28.9079	28.7777	29.5861	NaN	NaN	29.3878	46	46	46	44	44	44	120.84	0	323.31	25455000000	565	sp|P53396|ACLY_HUMAN
sp|P53618|COPB_HUMAN	27.2028	26.6532	25.9851	27.1944	27.5378	26.4581	NaN	NaN	NaN	19	19	19	27	27	27	107.14	0	298.11	6332300000	148	sp|P53618|COPB_HUMAN
sp|P53621|COPA_HUMAN	28.9052	25.2065	28.675	29.6122	28.6544	29.5076	NaN	NaN	24.201	48	48	48	41.4	41.4	41.4	138.34	0	323.31	20167000000	439	sp|P53621|COPA_HUMAN
sp|P53634|CATC_HUMAN	28.03	28.2278	27.8398	28.7736	27.9439	28.5241	NaN	NaN	27.4103	14	14	14	33.3	33.3	33.3	51.853	0	284.59	18462000000	249	sp|P53634|CATC_HUMAN
sp|P53999|TCP4_HUMAN	27.3005	26.6783	27.6091	27.3616	27.1479	27.6438	NaN	NaN	NaN	8	8	8	35.4	35.4	35.4	14.395	0	323.31	11808000000	196	sp|P53999|TCP4_HUMAN
sp|P54136|SYRC_HUMAN	28.1795	27.9179	26.9012	27.5257	27.0249	27.8535	NaN	NaN	26.5665	28	28	28	45.2	45.2	45.2	75.378	0	211.9	11063000000	219	sp|P54136|SYRC_HUMAN
sp|P54577|SYYC_HUMAN	27.6956	27.8777	26.9289	28.3098	28.0291	28.3986	NaN	NaN	NaN	19	19	19	48.7	48.7	48.7	59.143	0	323.31	13580000000	242	sp|P54577|SYYC_HUMAN
sp|P54578|UBP14_HUMAN	26.3468	26.5315	25.8161	25.8098	25.5737	25.3919	NaN	NaN	NaN	13	13	13	32	32	32	56.068	0	160.54	3257200000	88	sp|P54578|UBP14_HUMAN
sp|P54819|KAD2_HUMAN	26.911	27.8581	27.4059	28.5678	27.0128	27.4538	NaN	NaN	27.2412	11	11	11	48.5	48.5	48.5	26.477	0	323.31	12760000000	136	sp|P54819|KAD2_HUMAN
sp|P55010|IF5_HUMAN	24.4956	24.967	NaN	25.1972	24.765	24.4814	NaN	NaN	NaN	7	7	7	16.2	16.2	16.2	49.222	0	115.85	1277000000	35	sp|P55010|IF5_HUMAN
sp|P55060|XPO2_HUMAN	28.8511	28.3186	26.9638	27.9654	28.1535	28.2543	NaN	NaN	27.1904	32	32	32	48.7	48.7	48.7	110.42	0	323.31	15917000000	317	sp|P55060|XPO2_HUMAN
sp|P55072|TERA_HUMAN	31.3136	31.186	30.945	30.858	31.6355	31.1349	NaN	NaN	29.3764	70	70	70	79	79	79	89.321	0	323.31	127710000000	1908	sp|P55072|TERA_HUMAN
sp|P55145|MANF_HUMAN	23.9835	NaN	28.0434	24.5918	24.8947	25.2633	NaN	NaN	NaN	7	7	7	37.4	37.4	37.4	20.7	0	202.85	3728300000	51	sp|P55145|MANF_HUMAN
sp|P55209|NP1L1_HUMAN	27.4595	28.2521	26.9467	27.8289	26.3259	27.1759	NaN	NaN	26.6139	11	9	9	30.7	28.1	28.1	45.374	0	323.31	9722100000	165	sp|P55209|NP1L1_HUMAN
sp|P55735|SEC13_HUMAN	25.4965	25.8732	25.3491	26.0095	NaN	25.4146	NaN	NaN	NaN	5	5	5	27.3	27.3	27.3	35.54	0	161.48	2490800000	58	sp|P55735|SEC13_HUMAN
sp|P55769|NH2L1_HUMAN	NaN	25.1412	24.956	25.3764	24.8399	25.1172	NaN	NaN	NaN	5	5	5	45.3	45.3	45.3	14.173	0	125.94	2006200000	32	sp|P55769|NH2L1_HUMAN
sp|P55786|PSA_HUMAN;sp|A6NEC2|PSAL_HUMAN	28.8351	28.5428	28.3802	28.4822	29.0441	28.3769	NaN	NaN	27.1285	26	26	26	40.7	40.7	40.7	103.28	0	323.31	20421000000	424	sp|P55786|PSA_HUMAN
sp|P55884|EIF3B_HUMAN	29.0812	27.4125	27.6111	26.9099	27.3262	26.7902	NaN	NaN	24.3121	26	26	26	43.1	43.1	43.1	92.48	0	323.31	10564000000	260	sp|P55884|EIF3B_HUMAN
sp|P56192|SYMC_HUMAN	28.6904	28.1329	27.2742	26.5925	28.4453	27.3915	NaN	NaN	NaN	25	25	25	40.9	40.9	40.9	101.11	0	323.31	12622000000	254	sp|P56192|SYMC_HUMAN
sp|P56537|IF6_HUMAN	26.8964	26.767	26.0542	27.1591	25.8756	26.8272	NaN	NaN	NaN	8	8	8	56.7	56.7	56.7	26.599	0	323.31	6031100000	124	sp|P56537|IF6_HUMAN
sp|P57088|TMM33_HUMAN	24.2998	24.9052	26.6827	25.8544	NaN	NaN	NaN	NaN	NaN	7	7	7	23.5	23.5	23.5	27.978	0	92.418	2580700000	36	sp|P57088|TMM33_HUMAN
sp|P58546|MTPN_HUMAN	27.99	26.9355	25.6992	26.6647	25.5316	25.8934	NaN	NaN	NaN	8	8	8	88.1	88.1	88.1	12.895	0	323.31	7510100000	176	sp|P58546|MTPN_HUMAN
sp|Q99879|H2B1M_HUMAN;sp|Q99877|H2B1N_HUMAN;sp|Q93079|H2B1H_HUMAN;sp|Q5QNW6|H2B2F_HUMAN;sp|P62807|H2B1C_HUMAN;sp|P58876|H2B1D_HUMAN;sp|Q99880|H2B1L_HUMAN;sp|O60814|H2B1K_HUMAN;sp|P57053|H2BFS_HUMAN	27.5395	27.2729	28.5195	28.0442	28.1244	27.5094	NaN	27.3481	28.7039	11	11	4	63.5	63.5	11.9	13.989	0	81.868	15204000000	149	sp|Q99879|H2B1M_HUMAN;sp|Q99877|H2B1N_HUMAN;sp|Q93079|H2B1H_HUMAN;sp|Q5QNW6|H2B2F_HUMAN;sp|P62807|H2B1C_HUMAN;sp|P58876|H2B1D_HUMAN;sp|Q99880|H2B1L_HUMAN;sp|O60814|H2B1K_HUMAN;sp|P57053|H2BFS_HUMAN
sp|P59998|ARPC4_HUMAN	27.6578	27.5858	28.0894	28.0111	26.0735	28.2704	NaN	NaN	NaN	11	11	11	52.4	52.4	52.4	19.667	0	118.58	13060000000	130	sp|P59998|ARPC4_HUMAN
sp|P60033|CD81_HUMAN	24.3733	24.6784	25.8334	25.0045	24.2589	NaN	NaN	NaN	NaN	4	4	4	27.5	27.5	27.5	25.809	0	251.58	1614900000	48	sp|P60033|CD81_HUMAN
sp|P60174|TPIS_HUMAN	32.1581	32.5745	31.6848	32.8707	31.8642	32.8737	26.2937	NaN	31.7987	39	39	39	81.8	81.8	81.8	30.791	0	323.31	347540000000	2620	sp|P60174|TPIS_HUMAN
sp|P60228|EIF3E_HUMAN	24.7756	25.1374	24.3693	26.0199	24.7969	24.4591	NaN	NaN	24.223	11	11	11	24.5	24.5	24.5	52.22	0	37.306	1772100000	84	sp|P60228|EIF3E_HUMAN
sp|P60510|PP4C_HUMAN	26.2529	24.9987	24.4889	24.2743	NaN	NaN	NaN	NaN	NaN	6	4	4	25.4	20.5	20.5	35.08	0	126.42	1320500000	40	sp|P60510|PP4C_HUMAN
sp|P60660|MYL6_HUMAN	28.9161	28.5145	27.3857	28.1184	27.457	27.8109	NaN	NaN	NaN	11	11	8	62.9	62.9	43	16.93	0	270.97	19855000000	217	sp|P60660|MYL6_HUMAN
sp|P60842|IF4A1_HUMAN	29.1359	29.7144	29.7414	29.6571	29.3096	29.3131	NaN	NaN	28.5543	26	26	15	61.6	61.6	38.7	46.153	0	323.31	40317000000	361	sp|P60842|IF4A1_HUMAN
sp|P60866|RS20_HUMAN	29.5043	29.5949	30.2653	29.1389	29.3843	29.735	NaN	NaN	28.7355	10	10	10	48.7	48.7	48.7	13.373	0	238.36	54455000000	250	sp|P60866|RS20_HUMAN
sp|P60891|PRPS1_HUMAN;sp|P21108|PRPS3_HUMAN	27.7201	26.2568	24.9956	25.6228	24.726	25.2269	NaN	NaN	25.1779	11	11	4	37.7	37.7	15.4	34.834	0	185.2	3969700000	117	sp|P60891|PRPS1_HUMAN;sp|P21108|PRPS3_HUMAN
sp|P60900|PSA6_HUMAN	28.3383	28.1584	27.2039	28.401	27.0887	27.7796	NaN	NaN	26.3056	12	12	12	44.3	44.3	44.3	27.399	0	208.17	14906000000	183	sp|P60900|PSA6_HUMAN
sp|P60903|S10AA_HUMAN	26.8967	28.7406	28.1565	28.5683	27.9149	27.5032	NaN	NaN	NaN	6	6	6	40.2	40.2	40.2	11.203	0	180.9	19042000000	160	sp|P60903|S10AA_HUMAN
sp|P60953|CDC42_HUMAN;sp|P17081|RHOQ_HUMAN;sp|Q9H4E5|RHOJ_HUMAN	27.2671	27.2665	27.4333	27.3792	27.1462	26.8124	NaN	NaN	NaN	13	13	12	64.4	64.4	58.6	21.258	0	323.31	11112000000	324	sp|P60953|CDC42_HUMAN
sp|P60981|DEST_HUMAN	27.9234	27.6132	28.2346	27.9403	26.579	28.5751	NaN	NaN	NaN	13	10	10	58.2	50.9	50.9	18.506	0	272.27	14747000000	141	sp|P60981|DEST_HUMAN
sp|P60983|GMFB_HUMAN;sp|O60234|GMFG_HUMAN	25.6304	24.8729	25.6939	25.3037	23.6695	24.5963	NaN	NaN	NaN	8	8	8	44.4	44.4	44.4	16.713	0	303.28	2108600000	93	sp|P60983|GMFB_HUMAN
sp|P61019|RAB2A_HUMAN;sp|Q8WUD1|RAB2B_HUMAN	26.4838	26.85	27.3794	27.1185	26.5356	26.3695	NaN	NaN	NaN	14	14	14	58.5	58.5	58.5	23.545	0	323.31	6758400000	136	sp|P61019|RAB2A_HUMAN;sp|Q8WUD1|RAB2B_HUMAN
sp|P61026|RAB10_HUMAN	25.2496	25.9088	26.955	26.433	25.2811	24.8132	NaN	NaN	NaN	10	9	8	47.5	42	36	22.541	0	323.31	4074000000	83	sp|P61026|RAB10_HUMAN
sp|P62837|UB2D2_HUMAN;sp|P61077|UB2D3_HUMAN;sp|Q9Y2X8|UB2D4_HUMAN	26.3194	25.9426	26.294	25.7297	25.9189	27.1067	NaN	NaN	NaN	3	3	2	36.1	36.1	23.8	16.735	0	89.971	5222500000	97	sp|P62837|UB2D2_HUMAN;sp|P61077|UB2D3_HUMAN
sp|P61081|UBC12_HUMAN	25.3636	25.4275	24.8259	25.4127	NaN	25.3282	NaN	NaN	NaN	8	8	8	43.7	43.7	43.7	20.9	0	23.089	1963200000	39	sp|P61081|UBC12_HUMAN
sp|P61086|UBE2K_HUMAN	25.0717	25.5075	25.0723	25.7429	NaN	24.7301	NaN	NaN	NaN	5	5	5	40	40	40	22.406	0	43.239	2072000000	53	sp|P61086|UBE2K_HUMAN
sp|P61088|UBE2N_HUMAN;sp|Q5JXB2|UE2NL_HUMAN	28.1112	27.3744	27.9674	27.7431	28.3092	28.6713	NaN	NaN	24.3615	12	12	12	69.7	69.7	69.7	17.138	0	323.31	17478000000	266	sp|P61088|UBE2N_HUMAN;sp|Q5JXB2|UE2NL_HUMAN
sp|P61106|RAB14_HUMAN	27.0549	27.5594	28.0455	27.3084	27.017	27.0453	NaN	NaN	NaN	14	14	14	71.2	71.2	71.2	23.897	0	323.31	9980300000	153	sp|P61106|RAB14_HUMAN
sp|P61158|ARP3_HUMAN;sp|Q9P1U1|ARP3B_HUMAN;sp|Q9C0K3|ARP3C_HUMAN	NaN	27.0442	27.0015	26.8232	27.2361	27.0331	NaN	NaN	NaN	14	14	14	43.8	43.8	43.8	47.371	0	323.31	6143400000	143	sp|P61158|ARP3_HUMAN
sp|P61160|ARP2_HUMAN	NaN	25.6084	25.7676	25.728	25.6299	25.5686	NaN	NaN	NaN	6	6	6	23.1	23.1	23.1	44.76	0	239.17	2310800000	44	sp|P61160|ARP2_HUMAN
sp|P61163|ACTZ_HUMAN	NaN	25.0753	25.7133	25.6212	25.5851	25.6283	NaN	NaN	24.0913	8	8	6	27.9	27.9	19.9	42.613	0	168.74	2179200000	83	sp|P61163|ACTZ_HUMAN
sp|P61201|CSN2_HUMAN	NaN	25.1246	NaN	25.9854	25.3021	25.7432	NaN	NaN	NaN	9	9	9	36.8	36.8	36.8	51.596	0	60.416	1991800000	45	sp|P61201|CSN2_HUMAN
sp|P61224|RAP1B_HUMAN;sp|P62834|RAP1A_HUMAN;sp|A6NIZ1|RP1BL_HUMAN	26.7915	26.3484	27.3881	27.23	26.644	26.4244	NaN	NaN	NaN	7	7	7	50.5	50.5	50.5	20.825	0	185.92	6990900000	119	sp|P61224|RAP1B_HUMAN;sp|P62834|RAP1A_HUMAN;sp|A6NIZ1|RP1BL_HUMAN
sp|P61247|RS3A_HUMAN	30.1117	29.8678	29.574	29.0361	29.3526	29.1318	NaN	NaN	27.0609	29	29	29	66.3	66.3	66.3	29.945	0	323.31	42032000000	502	sp|P61247|RS3A_HUMAN
sp|P61254|RL26_HUMAN;sp|Q9UNX3|RL26L_HUMAN	27.252	27.937	28.42	27.0144	NaN	24.9793	NaN	NaN	NaN	11	11	11	50.3	50.3	50.3	17.258	0	94.814	9364500000	120	sp|P61254|RL26_HUMAN;sp|Q9UNX3|RL26L_HUMAN
sp|P61289|PSME3_HUMAN	26.9267	26.8682	25.6573	26.4834	NaN	26.0214	NaN	NaN	NaN	9	9	9	29.5	29.5	29.5	29.506	0	144.04	4181700000	116	sp|P61289|PSME3_HUMAN
sp|P61313|RL15_HUMAN	28.4187	28.6384	28.4419	27.2423	27.1769	27.6001	NaN	NaN	NaN	20	20	20	63.7	63.7	63.7	24.146	0	281.21	15922000000	226	sp|P61313|RL15_HUMAN
sp|P61353|RL27_HUMAN	28.8997	29.0464	29.8109	28.3672	26.8852	28.7185	NaN	NaN	26.9233	11	11	11	54.4	54.4	54.4	15.798	0	323.31	28472000000	200	sp|P61353|RL27_HUMAN
sp|P61513|RL37A_HUMAN;sp|A6NKH3|RL37L_HUMAN	25.5039	26.7498	25.5564	24.1055	NaN	24.5545	NaN	NaN	NaN	6	6	6	69.6	69.6	69.6	10.275	0	82.535	2870200000	39	sp|P61513|RL37A_HUMAN
sp|P61604|CH10_HUMAN	28.2405	28.5244	29.0985	29.8282	27.8891	28.9544	NaN	NaN	28.8307	15	15	15	90.2	90.2	90.2	10.932	0	283.99	31631000000	346	sp|P61604|CH10_HUMAN
sp|P61769|B2MG_HUMAN	24.9559	26.2818	26.1201	26.0811	25.6167	25.5637	NaN	NaN	NaN	6	6	6	71.4	71.4	71.4	13.714	0	158.13	4249500000	83	sp|P61769|B2MG_HUMAN
sp|P61923|COPZ1_HUMAN	26.2465	26.1741	25.9492	27.1974	NaN	26.0874	NaN	NaN	NaN	6	6	6	55.9	55.9	55.9	20.198	0	321.96	4348100000	79	sp|P61923|COPZ1_HUMAN
sp|P61960|UFM1_HUMAN	24.5001	24.7259	25.9763	24.9999	24.7454	24.4539	NaN	NaN	NaN	3	3	3	68.2	68.2	68.2	9.1175	0	32.973	2042900000	53	sp|P61960|UFM1_HUMAN
sp|P61970|NTF2_HUMAN	24.9019	24.9088	24.9295	24.411	NaN	24.2798	NaN	NaN	NaN	3	3	3	16.5	16.5	16.5	14.478	0	42.253	1499300000	28	sp|P61970|NTF2_HUMAN
sp|P61978|HNRPK_HUMAN	30.0718	29.139	28.4889	29.223	28.5573	29.1255	NaN	NaN	29.485	32	32	32	60.3	60.3	60.3	50.976	0	323.31	36108000000	719	sp|P61978|HNRPK_HUMAN
sp|P61981|1433G_HUMAN	30.2079	30.6678	29.5418	30.4629	29.9133	30.7133	NaN	NaN	29.5388	28	22	21	83.4	83	76.5	28.302	0	323.31	79755000000	802	sp|P61981|1433G_HUMAN
sp|P62081|RS7_HUMAN	29.9311	30.0528	30.2016	29.7135	29.0982	29.3214	NaN	NaN	28.5623	28	28	28	84.5	84.5	84.5	22.127	0	323.31	60351000000	770	sp|P62081|RS7_HUMAN
sp|P62140|PP1B_HUMAN	28.8696	27.9893	27.9253	28.245	27.6223	27.6932	NaN	NaN	NaN	23	23	11	67.6	67.6	44	37.186	0	323.31	15720000000	319	sp|P62140|PP1B_HUMAN
sp|P62191|PRS4_HUMAN	25.5778	25.6873	24.7308	NaN	24.3179	25.6831	NaN	NaN	NaN	10	10	10	20	20	20	49.184	0	175.3	2030400000	61	sp|P62191|PRS4_HUMAN
sp|P62195|PRS8_HUMAN;sp|Q8NB90|SPAT5_HUMAN	26.1128	25.3976	25.3426	NaN	25.6687	24.8264	NaN	NaN	NaN	9	9	9	40.6	40.6	40.6	45.626	0	323.31	2475700000	66	sp|P62195|PRS8_HUMAN
sp|P62241|RS8_HUMAN	30.1503	30.715	30.0752	29.7722	29.1691	29.5583	NaN	NaN	27.7573	20	20	20	64.4	64.4	64.4	24.205	0	323.31	62281000000	643	sp|P62241|RS8_HUMAN
sp|P62244|RS15A_HUMAN	28.6949	29.6226	29.0906	29.2975	28.3554	29.1826	NaN	NaN	NaN	15	15	15	79.2	79.2	79.2	14.839	0	323.31	38337000000	313	sp|P62244|RS15A_HUMAN
sp|P62249|RS16_HUMAN	29.8293	29.7394	30.0045	29.0551	28.4615	29.2325	NaN	NaN	26.9734	21	21	21	71.9	71.9	71.9	16.445	0	238.11	44348000000	387	sp|P62249|RS16_HUMAN
sp|P62258|1433E_HUMAN	31.4478	31.4084	30.3031	31.212	30.8845	31.3942	24.8942	NaN	30.2877	35	35	32	96.1	96.1	96.1	29.174	0	323.31	147630000000	1082	sp|P62258|1433E_HUMAN
sp|P62263|RS14_HUMAN	29.2068	28.5599	29.4363	27.9236	28.3034	29.3443	NaN	NaN	26.7112	13	13	13	71.5	71.5	71.5	16.273	0	323.31	29731000000	310	sp|P62263|RS14_HUMAN
sp|P62266|RS23_HUMAN	28.2626	27.8995	28.2555	27.3201	25.2982	26.2867	NaN	NaN	24.5652	14	14	14	60.1	60.1	60.1	15.807	0	146.12	12606000000	251	sp|P62266|RS23_HUMAN
sp|P62269|RS18_HUMAN	30.132	30.0532	30.2897	29.3465	28.6403	29.2428	NaN	NaN	28.4584	24	24	24	75.7	75.7	75.7	17.718	0	323.31	54360000000	462	sp|P62269|RS18_HUMAN
sp|P62273|RS29_HUMAN	25.6067	28.1009	27.225	27.2583	26.7749	25.5262	NaN	NaN	NaN	3	3	3	46.4	46.4	46.4	6.6767	0	154.56	9408800000	48	sp|P62273|RS29_HUMAN
sp|P62277|RS13_HUMAN	30.2586	29.637	30.3028	29.2807	28.0683	29.1838	NaN	NaN	28.1889	21	21	21	71.5	71.5	71.5	17.222	0	323.31	49380000000	496	sp|P62277|RS13_HUMAN
sp|P62280|RS11_HUMAN	29.6713	29.9704	30.4305	28.7177	28.5784	29.0909	NaN	NaN	NaN	21	21	21	81.6	81.6	81.6	18.431	0	261.01	45597000000	299	sp|P62280|RS11_HUMAN
sp|P62314|SMD1_HUMAN	27.9307	28.5022	28.8746	28.2075	26.3433	28.3507	NaN	NaN	28.2404	6	6	6	42.9	42.9	42.9	13.281	0	238.77	21058000000	146	sp|P62314|SMD1_HUMAN
sp|P62318|SMD3_HUMAN	26.4047	26.654	27.1237	26.9719	NaN	26.8754	NaN	NaN	NaN	5	5	5	38.9	38.9	38.9	13.916	0	247.75	6575200000	59	sp|P62318|SMD3_HUMAN
sp|P62333|PRS10_HUMAN	24.6506	26.0347	25.9573	NaN	NaN	25.437	NaN	NaN	NaN	8	8	8	22.1	22.1	22.1	44.172	0	246.62	2007100000	48	sp|P62333|PRS10_HUMAN
sp|P62424|RL7A_HUMAN	30.7467	30.0388	29.5905	28.329	27.6007	28.5916	NaN	NaN	25.4461	31	31	31	68	68	68	29.995	0	323.31	39951000000	401	sp|P62424|RL7A_HUMAN
sp|P62491|RB11A_HUMAN;sp|P57735|RAB25_HUMAN	26.5426	26.3235	27.2019	26.3406	26.0402	25.8795	NaN	NaN	NaN	11	11	1	53.7	53.7	13.4	24.393	0	259.84	5336500000	93	sp|P62491|RB11A_HUMAN
sp|P62495|ERF1_HUMAN	24.8183	25.7147	25.2568	25.4976	25.0097	24.564	NaN	NaN	NaN	5	5	5	19.5	19.5	19.5	49.03	0	148.06	1831900000	49	sp|P62495|ERF1_HUMAN
sp|P62633|CNBP_HUMAN	25.0889	24.9675	25.0338	24.1844	NaN	24.2691	NaN	NaN	NaN	5	5	5	46.3	46.3	46.3	19.463	0	146.53	1465000000	40	sp|P62633|CNBP_HUMAN
sp|P62701|RS4X_HUMAN;sp|P22090|RS4Y1_HUMAN;sp|Q8TD47|RS4Y2_HUMAN	30.3829	30.0424	29.6318	28.8326	28.8655	29.1769	NaN	NaN	27.3981	32	32	32	66.9	66.9	66.9	29.597	0	323.31	44289000000	593	sp|P62701|RS4X_HUMAN
sp|P62750|RL23A_HUMAN	27.7608	27.4321	28.4868	26.4846	NaN	26.2726	NaN	NaN	NaN	12	12	12	43.6	43.6	43.6	17.695	0	274.44	9549000000	93	sp|P62750|RL23A_HUMAN
sp|P62753|RS6_HUMAN	29.3428	29.2038	28.6474	27.9977	28.1662	28.1649	NaN	NaN	NaN	19	19	19	57	57	57	28.68	0	323.31	22990000000	259	sp|P62753|RS6_HUMAN
sp|P62805|H4_HUMAN	27.971	28.3247	28.0068	28.9371	27.6791	26.9293	NaN	27.5701	28.5949	14	14	14	61.2	61.2	61.2	11.367	0	228.42	19022000000	228	sp|P62805|H4_HUMAN
sp|P62820|RAB1A_HUMAN;sp|P59190|RAB15_HUMAN	24.9247	25.4525	27.5245	26.1521	25.4977	26.092	NaN	NaN	NaN	17	6	6	81.5	48.8	48.8	22.677	0	165.53	4799000000	107	sp|P62820|RAB1A_HUMAN
sp|P62826|RAN_HUMAN	30.1546	30.4642	29.5389	30.0958	29.4206	30.331	NaN	NaN	29.5526	23	23	23	58.8	58.8	58.8	24.423	0	323.31	64321000000	557	sp|P62826|RAN_HUMAN
sp|P62829|RL23_HUMAN	28.2904	28.5842	29.0828	28.0379	27.7127	28.4485	NaN	NaN	NaN	11	11	11	46.4	46.4	46.4	14.865	0	159.31	22009000000	202	sp|P62829|RL23_HUMAN
sp|P62841|RS15_HUMAN	25.8243	26.6968	26.288	24.5917	26.2626	23.6963	NaN	NaN	NaN	7	7	7	74.5	74.5	74.5	17.04	0	318.45	3625800000	82	sp|P62841|RS15_HUMAN
sp|P62847|RS24_HUMAN	26.3666	25.1235	25.7446	NaN	24.5182	24.166	NaN	NaN	NaN	5	5	5	36.8	36.8	36.8	15.423	0	39.729	2456200000	82	sp|P62847|RS24_HUMAN
sp|P62851|RS25_HUMAN	28.1039	28.0526	28.7593	27.2732	26.3347	28.5139	NaN	NaN	NaN	10	10	10	49.6	49.6	49.6	13.742	0	51.375	15847000000	116	sp|P62851|RS25_HUMAN
sp|P62854|RS26_HUMAN;sp|Q5JNZ5|RS26L_HUMAN	27.9442	28.0125	28.4284	27.4185	27.1508	27.1398	NaN	NaN	NaN	7	7	7	53.9	53.9	53.9	13.015	0	53.573	14116000000	182	sp|P62854|RS26_HUMAN;sp|Q5JNZ5|RS26L_HUMAN
sp|P62857|RS28_HUMAN	27.0955	27.7329	28.0204	26.8561	25.6047	26.5008	NaN	NaN	25.8467	9	9	9	79.7	79.7	79.7	7.8409	0	307.71	10022000000	164	sp|P62857|RS28_HUMAN
sp|P62861|RS30_HUMAN	26.3658	27.6471	26.1624	26.7868	26.0049	25.3932	NaN	NaN	NaN	5	5	5	33.9	33.9	33.9	6.6478	0	44.251	6952600000	95	sp|P62861|RS30_HUMAN
sp|P62873|GBB1_HUMAN;sp|P16520|GBB3_HUMAN	26.3588	26.4176	27.5555	26.8407	27.2266	25.7005	NaN	NaN	NaN	13	9	9	45.6	34.1	34.1	37.377	0	323.31	6062600000	135	sp|P62873|GBB1_HUMAN
sp|P62879|GBB2_HUMAN	27.0209	27.1203	28.0029	27.8579	27.8969	26.9324	NaN	NaN	NaN	14	14	8	54.1	54.1	38.8	37.331	0	323.31	10029000000	145	sp|P62879|GBB2_HUMAN
sp|P62888|RL30_HUMAN	29.0786	28.6511	28.8279	28.3847	28.285	28.4996	NaN	NaN	27.0115	12	12	12	74.8	74.8	74.8	12.784	0	323.31	27279000000	189	sp|P62888|RL30_HUMAN
sp|Q59GN2|R39L5_HUMAN;sp|P62891|RL39_HUMAN	25.7804	26.8138	26.6992	25.3616	24.1238	24.6375	NaN	NaN	NaN	2	2	2	23.5	23.5	23.5	6.3225	0	30.639	4057000000	40	sp|Q59GN2|R39L5_HUMAN;sp|P62891|RL39_HUMAN
sp|P62899|RL31_HUMAN	28.1315	28.0374	28.3186	27.6925	26.7129	26.9356	NaN	NaN	25.5105	10	10	10	48	48	48	14.463	0	120.18	14498000000	159	sp|P62899|RL31_HUMAN
sp|P62906|RL10A_HUMAN	28.762	29.2035	28.9365	28.9094	28.2734	28.3198	NaN	NaN	NaN	20	20	20	59.9	59.9	59.9	24.831	0	323.31	26030000000	337	sp|P62906|RL10A_HUMAN
sp|P62910|RL32_HUMAN	26.3046	26.8925	27.5603	25.0612	24.7845	26.9326	NaN	NaN	NaN	8	8	8	60.7	60.7	60.7	15.86	0	101.73	5764900000	81	sp|P62910|RL32_HUMAN
sp|P62913|RL11_HUMAN	27.1374	28.2881	28.2272	27.1467	27.7457	26.0908	NaN	NaN	27.083	12	12	12	69.1	69.1	69.1	20.252	0	153.45	11524000000	144	sp|P62913|RL11_HUMAN
sp|P62917|RL8_HUMAN	30.336	30.122	29.3887	28.8853	28.7857	28.7499	NaN	NaN	27.5649	21	21	21	56.8	56.8	56.8	28.024	0	323.31	41430000000	303	sp|P62917|RL8_HUMAN
sp|P62937|PPIA_HUMAN;sp|P0DN37|PAL4G_HUMAN;sp|P0DN26|PAL4F_HUMAN;sp|F5H284|PAL4D_HUMAN;sp|A0A0B4J2A2|PAL4C_HUMAN;sp|A0A075B759|PAL4E_HUMAN	31.7715	31.216	31.9067	31.459	31.1607	32.141	26.8359	NaN	31.6574	24	24	21	93.9	93.9	93.9	18.012	0	323.31	220540000000	1357	sp|P62937|PPIA_HUMAN
sp|P62979|RS27A_HUMAN;sp|P0CG47|UBB_HUMAN;sp|P0CG48|UBC_HUMAN	29.7728	30.0329	30.7424	30.8193	30.6018	31.1916	26.3387	26.3823	30.7584	12	12	2	58.3	58.3	16	17.965	0	323.31	81224000000	686	sp|P62979|RS27A_HUMAN;sp|P0CG47|UBB_HUMAN;sp|P0CG48|UBC_HUMAN
sp|P63000|RAC1_HUMAN;sp|P60763|RAC3_HUMAN;sp|P15153|RAC2_HUMAN	26.5188	26.2436	27.6557	25.6937	26.4755	26.6796	NaN	NaN	NaN	12	11	11	64.6	58.9	58.9	21.45	0	135.62	5810300000	84	sp|P63000|RAC1_HUMAN;sp|P60763|RAC3_HUMAN
sp|P63010|AP2B1_HUMAN	28.1939	28.0571	27.9047	27.5789	27.7657	27.153	NaN	NaN	NaN	26	26	17	32.9	32.9	23.1	104.55	0	323.31	11301000000	283	sp|P63010|AP2B1_HUMAN
sp|P63104|1433Z_HUMAN	31.049	31.4685	30.798	31.6582	30.7992	31.4254	25.9863	NaN	30.1854	34	31	24	84.1	84.1	68.6	27.745	0	323.31	148170000000	1246	sp|P63104|1433Z_HUMAN
sp|P63151|2ABA_HUMAN;sp|Q66LE6|2ABD_HUMAN;sp|Q00005|2ABB_HUMAN	24.5104	24.4597	NaN	25.9131	24.3122	24.7249	NaN	NaN	NaN	8	8	8	26.4	26.4	26.4	51.691	0	149.54	1368100000	64	sp|P63151|2ABA_HUMAN;sp|Q66LE6|2ABD_HUMAN
sp|P63167|DYL1_HUMAN	27.6617	29.5438	28.6503	28.692	27.7499	28.509	NaN	NaN	NaN	7	7	3	44.9	44.9	14.6	10.366	0	135.71	27294000000	154	sp|P63167|DYL1_HUMAN
sp|P63172|DYLT1_HUMAN	23.7567	23.3733	23.6072	24.4342	NaN	NaN	NaN	NaN	NaN	3	3	3	49.6	49.6	49.6	12.452	0	115.39	867910000	43	sp|P63172|DYLT1_HUMAN
sp|P63173|RL38_HUMAN	28.2282	29.7091	29.1095	28.9362	27.671	28.0771	NaN	NaN	NaN	8	8	8	57.1	57.1	57.1	8.2178	0	133.33	30976000000	194	sp|P63173|RL38_HUMAN
sp|P63220|RS21_HUMAN	26.732	27.9774	27.9328	27.6803	NaN	26.4354	NaN	NaN	NaN	9	9	9	85.5	85.5	85.5	9.1113	0	155.83	10330000000	98	sp|P63220|RS21_HUMAN
sp|P63241|IF5A1_HUMAN;sp|Q6IS14|IF5AL_HUMAN;sp|Q9GZV4|IF5A2_HUMAN	28.4427	27.8358	28.118	28.4283	26.4488	27.9277	NaN	NaN	27.1364	15	15	15	83.1	83.1	83.1	16.832	0	323.31	17320000000	341	sp|P63241|IF5A1_HUMAN;sp|Q6IS14|IF5AL_HUMAN
sp|P63244|RACK1_HUMAN	30.9259	29.9764	29.877	29.5791	29.3008	29.1883	NaN	NaN	28.8936	32	32	32	89	89	89	35.076	0	323.31	54940000000	554	sp|P63244|RACK1_HUMAN
sp|P63261|ACTG_HUMAN	32.6882	33.3481	33.8176	33.3287	34.3233	34.079	30.157	28.5894	33.1873	57	57	2	99.2	99.2	7.2	41.792	0	323.31	709140000000	3038	sp|P63261|ACTG_HUMAN
sp|P63279|UBC9_HUMAN	25.5355	25.6243	25.1615	25.7753	NaN	25.352	NaN	NaN	NaN	9	9	9	65.8	65.8	65.8	18.007	0	76.857	2437400000	70	sp|P63279|UBC9_HUMAN
sp|P67775|PP2AA_HUMAN	27.073	26.2849	25.8948	26.7638	26.8035	25.8893	NaN	NaN	NaN	15	15	4	66.7	66.7	10.7	35.594	0	323.31	4939800000	122	sp|P67775|PP2AA_HUMAN
sp|P67870|CSK2B_HUMAN	25.3565	25.8411	25.1545	24.5001	NaN	NaN	NaN	NaN	NaN	5	5	5	34.4	34.4	34.4	24.942	0	190.88	1760600000	48	sp|P67870|CSK2B_HUMAN
sp|P67936|TPM4_HUMAN;sp|P07951|TPM2_HUMAN;CON__Q3SX28	30.2275	30.2899	29.1137	29.6364	28.8117	29.8566	NaN	NaN	27.5716	26	26	17	77.4	77.4	54.8	28.521	0	323.31	48981000000	406	sp|P67936|TPM4_HUMAN
sp|P68133|ACTS_HUMAN;sp|P68032|ACTC_HUMAN;sp|P63267|ACTH_HUMAN;sp|P62736|ACTA_HUMAN	24.5725	26.7776	25.8833	27.651	29.0516	27.4954	NaN	NaN	NaN	28	4	4	39	8.8	8.8	42.051	0	323.31	15628000000	337	sp|P68133|ACTS_HUMAN;sp|P68032|ACTC_HUMAN;sp|P63267|ACTH_HUMAN;sp|P62736|ACTA_HUMAN
sp|P68036|UB2L3_HUMAN;sp|A0A1B0GUS4|UB2L5_HUMAN	24.8106	24.3359	24.7657	25.1902	23.8828	24.6694	NaN	NaN	NaN	7	7	7	48.7	48.7	48.7	17.861	0	106.76	1576400000	82	sp|P68036|UB2L3_HUMAN;sp|A0A1B0GUS4|UB2L5_HUMAN
sp|P68104|EF1A1_HUMAN;sp|Q5VTE0|EF1A3_HUMAN	31.5848	32.3723	31.7996	32.0658	32.7034	32.1006	27.2825	NaN	32.1087	41	41	24	74.9	74.9	53.2	50.14	0	323.31	287030000000	2067	sp|P68104|EF1A1_HUMAN;sp|Q5VTE0|EF1A3_HUMAN
sp|P68363|TBA1B_HUMAN;sp|A6NHL2|TBAL3_HUMAN;sp|Q9H853|TBA4B_HUMAN	29.6242	29.8565	29.1528	29.3825	28.8903	29.3074	NaN	NaN	28.9888	46	7	0	74.5	14	0	50.151	0	286.37	46278000000	558	sp|P68363|TBA1B_HUMAN
sp|P68366|TBA4A_HUMAN	25.7204	26.3135	24.8507	25.7941	25.3607	26.4533	NaN	NaN	NaN	38	8	8	73.7	22.5	22.5	49.924	0	219.27	3293600000	76	sp|P68366|TBA4A_HUMAN
sp|P68371|TBB4B_HUMAN	30.2972	30.4728	29.3906	30.2649	30.485	30.8692	NaN	NaN	30.4644	40	13	2	78.4	30.3	3.6	49.83	0	323.31	85821000000	651	sp|P68371|TBB4B_HUMAN
sp|P68400|CSK21_HUMAN;sp|Q8NEV1|CSK23_HUMAN	26.2133	26.9261	27.3246	26.5908	25.2807	26.6687	NaN	NaN	25.668	11	11	11	43.2	43.2	43.2	45.143	0	239.76	5346200000	129	sp|P68400|CSK21_HUMAN;sp|Q8NEV1|CSK23_HUMAN
sp|P68402|PA1B2_HUMAN	26.3947	26.917	25.2765	27.2984	25.5734	26.7277	NaN	NaN	NaN	5	5	5	45	45	45	25.569	0	127.93	5432000000	95	sp|P68402|PA1B2_HUMAN
sp|P78330|SERB_HUMAN	25.787	25.2735	25.5467	26.2547	NaN	26.3891	NaN	NaN	NaN	7	7	7	38.7	38.7	38.7	25.007	0	101.1	3020700000	54	sp|P78330|SERB_HUMAN
sp|P78347|GTF2I_HUMAN	25.4435	25.8019	24.6466	NaN	24.0112	NaN	NaN	NaN	NaN	7	7	7	12.2	12.2	12.2	112.42	0	179.13	1368300000	61	sp|P78347|GTF2I_HUMAN
sp|P78371|TCPB_HUMAN	30.4744	30.376	29.1028	29.9564	29.191	29.872	NaN	NaN	28.6673	50	50	50	82.2	82.2	82.2	57.488	0	323.31	54580000000	865	sp|P78371|TCPB_HUMAN
sp|P78417|GSTO1_HUMAN	27.0197	26.722	25.2056	27.276	25.0519	27.3614	NaN	NaN	NaN	15	15	15	54.4	54.4	54.4	27.566	0	164.96	6658600000	169	sp|P78417|GSTO1_HUMAN
sp|P78527|PRKDC_HUMAN	32.9068	32.3658	31.441	31.6305	31.5262	31.1839	NaN	NaN	31.2158	313	313	313	66.3	66.3	66.3	469.08	0	323.31	168430000000	3001	sp|P78527|PRKDC_HUMAN
sp|P78559|MAP1A_HUMAN	27.9281	27.4111	28.1833	27.3974	27.6442	27.3577	NaN	NaN	NaN	39	37	37	20.2	19.3	19.3	305.48	0	323.31	8093800000	233	sp|P78559|MAP1A_HUMAN
sp|P80217|IN35_HUMAN	23.144	22.9321	23.413	23.8625	NaN	23.3418	NaN	NaN	NaN	3	3	3	12.2	12.2	12.2	31.546	0	96.622	493090000	31	sp|P80217|IN35_HUMAN
sp|P81605|DCD_HUMAN	NaN	NaN	NaN	25.2336	25.2493	25.7112	27.6221	27.1945	26.4763	3	3	3	35.5	35.5	35.5	11.284	0	28.605	1877600000	45	sp|P81605|DCD_HUMAN
sp|P83731|RL24_HUMAN	28.016	28.4201	28.4445	27.2555	27.3921	27.1275	NaN	NaN	NaN	18	18	18	68.2	68.2	68.2	17.779	0	158.51	14422000000	162	sp|P83731|RL24_HUMAN
sp|P83881|RL36A_HUMAN;sp|Q969Q0|RL36L_HUMAN	26.6738	26.2582	27.0846	25.8886	NaN	25.5071	NaN	NaN	NaN	6	6	6	42.5	42.5	42.5	12.441	0	122.03	4407800000	56	sp|P83881|RL36A_HUMAN;sp|Q969Q0|RL36L_HUMAN
sp|P84077|ARF1_HUMAN	25.3371	25.1231	25.8638	25.4754	23.9855	25.4316	NaN	NaN	NaN	12	7	3	71.8	42	21	20.697	0	189.76	2400800000	81	sp|P84077|ARF1_HUMAN
sp|P84090|ERH_HUMAN	25.445	28.2736	27.3255	27.9851	27.1368	27.5906	NaN	NaN	27.3114	5	5	5	38.5	38.5	38.5	12.259	0	234.23	13309000000	129	sp|P84090|ERH_HUMAN
sp|P84095|RHOG_HUMAN	23.6605	23.936	25.5727	NaN	NaN	NaN	NaN	NaN	NaN	5	4	4	44	38.2	38.2	21.308	0	287.66	1027800000	35	sp|P84095|RHOG_HUMAN
sp|P84098|RL19_HUMAN	27.4638	28.6111	27.9721	26.0793	25.671	26.6183	NaN	NaN	NaN	13	13	13	38.3	38.3	38.3	23.466	0	286.47	10230000000	175	sp|P84098|RL19_HUMAN
sp|P84103|SRSF3_HUMAN	27.0041	28.1019	28.4699	27.6841	26.9172	27.0771	NaN	NaN	28.2498	7	7	6	44.5	44.5	44.5	19.329	0	250.19	12816000000	190	sp|P84103|SRSF3_HUMAN
sp|P84243|H33_HUMAN;sp|Q71DI3|H32_HUMAN;sp|Q16695|H31T_HUMAN;sp|P68431|H31_HUMAN;sp|Q6NXT2|H3C_HUMAN	27.4982	26.6057	27.9326	27.5452	27.6818	25.6331	26.5267	26.9117	28.1222	7	7	7	46.3	46.3	46.3	15.328	0	319.46	10853000000	114	sp|P84243|H33_HUMAN;sp|Q71DI3|H32_HUMAN;sp|Q16695|H31T_HUMAN;sp|P68431|H31_HUMAN
sp|P99999|CYC_HUMAN;CON__P62894	25.7456	26.6487	25.9437	26.4428	26.0169	26.0539	NaN	NaN	NaN	9	9	9	52.4	52.4	52.4	11.749	0	78.543	4985400000	63	sp|P99999|CYC_HUMAN
sp|Q00341|VIGLN_HUMAN	27.8531	28.2883	29.759	28.522	27.6144	27.6814	NaN	NaN	NaN	35	35	35	29.6	29.6	29.6	141.45	0	323.31	15488000000	257	sp|Q00341|VIGLN_HUMAN
sp|Q00610|CLH1_HUMAN	31.762	32.9454	32.4447	32.7592	31.7831	32.4585	NaN	NaN	31.4539	125	125	99	69.9	69.9	59.5	191.61	0	323.31	264240000000	2892	sp|Q00610|CLH1_HUMAN
sp|Q00688|FKBP3_HUMAN	26.5252	26.28	25.9324	25.8208	NaN	NaN	NaN	NaN	NaN	9	9	9	43.8	43.8	43.8	25.177	0	285.62	2769400000	49	sp|Q00688|FKBP3_HUMAN
sp|Q00765|REEP5_HUMAN	NaN	25.1545	26.5936	25.6981	25.8634	25.8797	NaN	NaN	NaN	7	7	7	24.3	24.3	24.3	21.493	0	107.91	3017200000	43	sp|Q00765|REEP5_HUMAN
sp|Q00839|HNRPU_HUMAN	29.6679	29.4875	29.5996	28.5585	28.6218	28.5068	NaN	NaN	29.3992	28	28	28	35.8	35.8	35.8	90.583	0	323.31	29485000000	414	sp|Q00839|HNRPU_HUMAN
sp|Q01082|SPTB2_HUMAN	30.3054	30.4123	29.8334	29.5602	28.9528	28.6435	NaN	NaN	NaN	99	99	90	48.8	48.8	44.5	274.61	0	323.31	36734000000	802	sp|Q01082|SPTB2_HUMAN
sp|Q01105|SET_HUMAN;sp|P0DME0|SETLP_HUMAN	27.2689	27.6997	27.7064	27.5782	27.8013	27.5555	NaN	NaN	27.4069	13	13	13	55.9	55.9	55.9	33.488	0	279.21	11116000000	205	sp|Q01105|SET_HUMAN
sp|Q01130|SRSF2_HUMAN;sp|Q9BRL6|SRSF8_HUMAN	25.0342	27.2875	NaN	25.1843	25.5524	24.7487	NaN	NaN	NaN	8	8	8	28.1	28.1	28.1	25.476	0	114.98	3526700000	47	sp|Q01130|SRSF2_HUMAN
sp|Q01433|AMPD2_HUMAN	25.3631	25.1513	NaN	25.4287	25.4064	25.2656	NaN	NaN	NaN	8	8	8	9.9	9.9	9.9	100.69	0	147.69	1774000000	35	sp|Q01433|AMPD2_HUMAN
sp|Q01469|FABP5_HUMAN;sp|A8MUU1|FB5L3_HUMAN	26.0444	25.8891	NaN	26.2459	24.5807	27.0376	NaN	NaN	NaN	10	10	10	78.5	78.5	78.5	15.164	0	267.96	3614500000	54	sp|Q01469|FABP5_HUMAN
sp|Q01518|CAP1_HUMAN	28.407	28.6034	27.5551	28.4336	27.8076	28.5916	NaN	NaN	24.3928	24	24	24	61.7	61.7	61.7	51.901	0	323.31	18104000000	326	sp|Q01518|CAP1_HUMAN
sp|Q01813|PFKAP_HUMAN	26.8387	26.5141	NaN	26.1281	25.5552	26.2746	NaN	NaN	NaN	17	16	15	24.9	23.7	22.6	85.595	0	286.4	3845900000	91	sp|Q01813|PFKAP_HUMAN
sp|Q02543|RL18A_HUMAN	28.5343	28.7473	28.7761	27.7251	26.886	27.2324	NaN	NaN	24.8978	15	15	15	60.8	60.8	60.8	20.762	0	276.98	17564000000	244	sp|Q02543|RL18A_HUMAN
sp|Q02790|FKBP4_HUMAN	27.9416	27.8107	26.6464	27.679	27.0311	28.3222	NaN	NaN	26.3637	14	14	14	38.3	38.3	38.3	51.804	0	323.31	11625000000	165	sp|Q02790|FKBP4_HUMAN
sp|Q02809|PLOD1_HUMAN	24.7047	25.7326	25.7064	25.0584	25.8434	24.2126	NaN	NaN	NaN	9	9	9	18.6	18.6	18.6	83.549	0	105.09	1808700000	55	sp|Q02809|PLOD1_HUMAN
sp|Q02878|RL6_HUMAN	28.067	28.4532	29.507	27.305	27.3098	27.0381	NaN	NaN	25.0696	21	21	21	63.2	63.2	63.2	32.728	0	323.31	17384000000	291	sp|Q02878|RL6_HUMAN
sp|Q02952|AKA12_HUMAN	26.3744	26.6473	25.0607	27.6724	26.1874	26.42	NaN	NaN	NaN	12	12	12	14.2	14.2	14.2	191.48	0	323.31	4354700000	109	sp|Q02952|AKA12_HUMAN
sp|Q03001|DYST_HUMAN	30.2587	28.2648	27.3541	24.2589	25.2469	26.5171	NaN	NaN	NaN	114	109	109	21.6	20.9	20.9	860.65	0	323.31	12322000000	386	sp|Q03001|DYST_HUMAN
sp|Q03135|CAV1_HUMAN;sp|P56539|CAV3_HUMAN	25.0121	NaN	25.9333	26.2118	27.0304	24.1139	NaN	NaN	NaN	6	6	6	42.1	42.1	42.1	20.471	0	134.19	2922800000	91	sp|Q03135|CAV1_HUMAN
sp|Q04637|IF4G1_HUMAN	28.0914	27.6977	29.3505	28.3007	28.0743	27.7027	NaN	NaN	NaN	32	32	27	26.2	26.2	23.9	175.49	0	323.31	13403000000	283	sp|Q04637|IF4G1_HUMAN
sp|Q04760|LGUL_HUMAN	27.9339	27.5937	26.7607	27.3692	26.9311	27.7533	NaN	NaN	NaN	15	15	15	69.6	69.6	69.6	20.777	0	158.62	10320000000	185	sp|Q04760|LGUL_HUMAN
sp|Q04837|SSBP_HUMAN	26.0604	26.449	26.7813	27.1713	27.0337	27.972	NaN	NaN	26.8999	10	10	10	62.2	62.2	62.2	17.259	0	155.16	8685400000	119	sp|Q04837|SSBP_HUMAN
sp|Q04917|1433F_HUMAN	26.381	25.9096	24.691	26.6137	NaN	25.6398	NaN	NaN	27.344	16	10	10	50	42.7	42.7	28.218	0	323.31	3853900000	89	sp|Q04917|1433F_HUMAN
sp|Q06210|GFPT1_HUMAN	25.8968	25.7128	25.0886	25.5066	26.1451	25.7462	NaN	NaN	NaN	13	13	7	26.9	26.9	16.3	78.806	0	323.31	3130600000	91	sp|Q06210|GFPT1_HUMAN
sp|Q06323|PSME1_HUMAN	28.4136	28.2105	26.8716	28.2159	27.6446	28.2095	NaN	NaN	26.9119	16	16	16	60.2	60.2	60.2	28.723	0	323.31	15475000000	308	sp|Q06323|PSME1_HUMAN
sp|Q06830|PRDX1_HUMAN	31.6764	31.1181	31.0736	30.8013	31.1595	31.457	25.2508	25.0985	29.4726	33	33	29	95.5	95.5	95.5	22.11	0	323.31	144130000000	1038	sp|Q06830|PRDX1_HUMAN
sp|Q07020|RL18_HUMAN	29.1552	29.6964	29.6496	28.3831	27.1734	27.8363	NaN	NaN	NaN	18	18	18	58.5	58.5	58.5	21.634	0	323.31	29839000000	206	sp|Q07020|RL18_HUMAN
sp|Q07021|C1QBP_HUMAN	26.061	26.6099	26.2065	27.0147	NaN	26.5369	NaN	NaN	27.7281	6	6	6	39	39	39	31.362	0	323.31	5279600000	112	sp|Q07021|C1QBP_HUMAN
sp|Q07065|CKAP4_HUMAN;sp|Q96K21|ANCHR_HUMAN	NaN	NaN	28.3188	27.5022	29.0564	24.7644	NaN	NaN	NaN	32	32	32	60.5	60.5	60.5	66.022	0	323.31	7589700000	213	sp|Q07065|CKAP4_HUMAN
sp|Q07954|LRP1_HUMAN;sp|Q9NZR2|LRP1B_HUMAN	27.2255	27.8514	31.1849	23.7661	30.2492	22.673	NaN	NaN	NaN	73	73	73	20	20	20	504.6	0	323.31	25812000000	472	sp|Q07954|LRP1_HUMAN
sp|Q07955|SRSF1_HUMAN	25.4795	25.9821	25.3446	24.3823	25.134	24.4358	NaN	NaN	26.0537	14	14	14	45.2	45.2	45.2	27.744	0	323.31	2333900000	91	sp|Q07955|SRSF1_HUMAN
sp|Q07960|RHG01_HUMAN	NaN	26.332	25.7695	25.6313	25.8445	26.0172	NaN	NaN	NaN	10	10	10	36.9	36.9	36.9	50.435	0	231.4	2570200000	74	sp|Q07960|RHG01_HUMAN
sp|Q08211|DHX9_HUMAN	28.9052	27.5213	28.597	28.9839	28.5303	29.4417	NaN	NaN	29.5279	38	38	38	27.9	27.9	27.9	140.96	0	323.31	20665000000	403	sp|Q08211|DHX9_HUMAN
sp|Q08257|QOR_HUMAN	27.3787	25.438	26.6387	26.0865	26.0191	26.1745	NaN	NaN	24.5465	11	11	11	49.5	49.5	49.5	35.206	0	323.31	4849500000	108	sp|Q08257|QOR_HUMAN
sp|Q08380|LG3BP_HUMAN	23.8035	24.6677	29.5896	NaN	29.3672	24.5053	NaN	NaN	23.1068	20	20	20	39.1	39.1	39.1	65.33	0	323.31	10236000000	206	sp|Q08380|LG3BP_HUMAN
sp|Q08945|SSRP1_HUMAN	23.8293	24.049	23.9496	NaN	NaN	NaN	NaN	NaN	NaN	5	5	5	10	10	10	81.074	0	23.68	407940000	21	sp|Q08945|SSRP1_HUMAN
sp|Q08J23|NSUN2_HUMAN	25.212	24.9647	24.7009	NaN	NaN	23.8782	NaN	NaN	NaN	7	7	7	14.9	14.9	14.9	86.47	0	57.906	1096200000	52	sp|Q08J23|NSUN2_HUMAN
sp|Q12765|SCRN1_HUMAN	26.4218	26.9918	26.1658	27.2816	26.3917	26.7326	NaN	NaN	26.0813	9	9	9	26.8	26.8	26.8	46.382	0	99.691	5854900000	146	sp|Q12765|SCRN1_HUMAN
sp|Q12792|TWF1_HUMAN	27.6273	26.6536	26.4453	26.4946	26.2994	26.6655	NaN	NaN	NaN	12	12	11	44.3	44.3	42.3	40.282	0	323.31	5730700000	109	sp|Q12792|TWF1_HUMAN
sp|Q12904|AIMP1_HUMAN	26.3533	26.3241	26.8912	26.4885	27.1038	26.6676	NaN	NaN	NaN	12	12	12	53.8	53.8	53.8	34.352	0	323.31	5364600000	158	sp|Q12904|AIMP1_HUMAN
sp|Q12905|ILF2_HUMAN	26.8453	27.5026	28.3857	27.8803	27.4603	27.8288	NaN	NaN	28.6809	15	15	15	45.9	45.9	45.9	43.062	0	290.28	12637000000	215	sp|Q12905|ILF2_HUMAN
sp|Q12906|ILF3_HUMAN	27.3804	27.4001	27.1088	27.1154	26.965	26.9231	NaN	NaN	27.7596	20	20	19	26.5	26.5	24.6	95.337	0	323.31	7555200000	224	sp|Q12906|ILF3_HUMAN
sp|Q13085|ACACA_HUMAN;sp|O00763|ACACB_HUMAN	27.622	27.7686	27.7212	28.3915	28.0974	27.85	NaN	NaN	NaN	48	48	48	27.6	27.6	27.6	265.55	0	323.31	10701000000	273	sp|Q13085|ACACA_HUMAN
sp|Q13126|MTAP_HUMAN	27.457	26.766	25.304	27.3809	25.9648	26.5566	NaN	NaN	NaN	11	11	11	45.9	45.9	45.9	31.236	0	268.18	6162300000	151	sp|Q13126|MTAP_HUMAN
sp|Q13155|AIMP2_HUMAN	27.4238	26.3064	NaN	26.3996	26.1686	26.2479	NaN	NaN	NaN	13	13	13	55.9	55.9	55.9	35.348	0	323.31	4355900000	108	sp|Q13155|AIMP2_HUMAN
sp|Q13162|PRDX4_HUMAN	25.0571	25.1184	26.3096	25.6524	26.3602	25.835	NaN	NaN	27.2482	12	9	9	53.9	51.3	51.3	30.54	0	269.01	3133200000	112	sp|Q13162|PRDX4_HUMAN
sp|Q13185|CBX3_HUMAN;sp|P45973|CBX5_HUMAN	26.2514	25.6811	27.0945	25.9762	NaN	24.5864	NaN	NaN	25.3346	10	10	10	53.6	53.6	53.6	20.811	0	226.75	3671500000	87	sp|Q13185|CBX3_HUMAN
sp|Q13200|PSMD2_HUMAN	28.9706	28.4256	27.4071	27.843	27.5237	27.5732	NaN	NaN	26.2369	24	24	24	39.2	39.2	39.2	100.2	0	323.31	14243000000	248	sp|Q13200|PSMD2_HUMAN
sp|Q13247|SRSF6_HUMAN;sp|Q08170|SRSF4_HUMAN;sp|Q13243|SRSF5_HUMAN	25.754	26.5519	25.8394	25.3463	NaN	25.8851	NaN	NaN	NaN	6	6	6	15.1	15.1	15.1	39.586	0	25.01	3124600000	38	sp|Q13247|SRSF6_HUMAN
sp|Q13263|TIF1B_HUMAN	27.8086	27.4703	26.6607	26.5325	26.003	26.1919	NaN	NaN	27.7385	24	24	24	35.4	35.4	35.4	88.549	0	323.31	7121700000	167	sp|Q13263|TIF1B_HUMAN
sp|Q13283|G3BP1_HUMAN	27.4778	28.176	27.7195	27.1581	26.0021	26.4837	NaN	NaN	NaN	10	10	10	30.9	30.9	30.9	52.164	0	323.31	8054400000	170	sp|Q13283|G3BP1_HUMAN
sp|Q13310|PABP4_HUMAN	26.0945	26.2803	25.378	25.1329	25.3627	25.2174	NaN	NaN	NaN	17	7	6	28.1	14.1	12.7	70.782	0	84.317	2543300000	55	sp|Q13310|PABP4_HUMAN
sp|Q13347|EIF3I_HUMAN	28.4813	26.6278	26.5862	25.6142	26.2498	26.3882	NaN	NaN	25.0714	14	14	14	47.1	47.1	47.1	36.501	0	281.44	6794500000	118	sp|Q13347|EIF3I_HUMAN
sp|Q13404|UB2V1_HUMAN	27.4025	26.3271	26.7834	26.6523	25.6456	27.5551	NaN	NaN	NaN	12	12	7	52.4	52.4	34.7	16.495	0	108.12	7087700000	95	sp|Q13404|UB2V1_HUMAN
sp|Q13442|HAP28_HUMAN	23.8915	25.5529	24.576	25.114	NaN	NaN	NaN	NaN	NaN	4	4	4	21	21	21	20.63	0	119	1471900000	29	sp|Q13442|HAP28_HUMAN
sp|Q13501|SQSTM_HUMAN	26.495	26.8038	26.6555	26.6611	26.5932	26.3453	NaN	NaN	NaN	10	10	10	37.5	37.5	37.5	47.687	0	200.95	4959900000	106	sp|Q13501|SQSTM_HUMAN
sp|Q13509|TBB3_HUMAN	27.8661	28.2538	28.1099	28.0067	27.3653	28.2663	NaN	NaN	27.494	28	12	10	58.2	37.6	34.9	50.432	0	323.31	13974000000	246	sp|Q13509|TBB3_HUMAN
sp|Q13557|KCC2D_HUMAN;sp|Q9UQM7|KCC2A_HUMAN;sp|Q13554|KCC2B_HUMAN	28.9517	28.936	29.0064	29.3535	29.1819	29.5786	NaN	NaN	25.3723	24	24	19	58.9	58.9	47.3	56.369	0	323.31	31584000000	527	sp|Q13557|KCC2D_HUMAN
sp|Q13813|SPTN1_HUMAN	31.1763	30.5718	29.9686	29.9937	29.1194	29.0181	NaN	NaN	NaN	130	130	130	60.6	60.6	60.6	284.54	0	323.31	47090000000	1124	sp|Q13813|SPTN1_HUMAN
sp|Q13838|DX39B_HUMAN;sp|O00148|DX39A_HUMAN	25.6359	26.2236	26.5919	27.3665	26.567	26.0856	NaN	NaN	26.0552	13	13	13	42.1	42.1	42.1	48.991	0	274.34	4890700000	126	sp|Q13838|DX39B_HUMAN;sp|O00148|DX39A_HUMAN
sp|Q13885|TBB2A_HUMAN	27.1927	27.5183	26.2607	27.4147	26.7144	28.086	NaN	NaN	27.0565	40	2	2	72.6	3.6	3.6	49.906	0	64.407	9390700000	62	sp|Q13885|TBB2A_HUMAN
sp|Q14008|CKAP5_HUMAN	27.7601	28.1547	28.8153	28.2192	27.4874	27.7864	NaN	NaN	NaN	29	29	29	20.8	20.8	20.8	225.49	0	323.31	14329000000	160	sp|Q14008|CKAP5_HUMAN
sp|Q14019|COTL1_HUMAN	27.7982	27.7972	27.0588	28.3755	27.6319	28.5427	NaN	NaN	NaN	15	15	15	78.2	78.2	78.2	15.945	0	244.46	16866000000	358	sp|Q14019|COTL1_HUMAN
sp|Q14103|HNRPD_HUMAN	27.0081	27.6145	27.7828	27.7991	27.4391	27.6433	NaN	NaN	28.0171	10	10	8	25.9	25.9	23.1	38.434	0	138.52	11109000000	167	sp|Q14103|HNRPD_HUMAN
sp|Q14123|PDE1C_HUMAN;sp|P54750|PDE1A_HUMAN	24.9411	25.1627	NaN	25.532	24.919	25.4886	NaN	NaN	NaN	15	15	13	25.8	25.8	23.8	80.759	0	252.29	1973700000	67	sp|Q14123|PDE1C_HUMAN
sp|Q14152|EIF3A_HUMAN	28.618	28.6003	28.8968	28.234	27.5834	28.4132	NaN	NaN	25.8812	45	45	45	33.4	33.4	33.4	166.57	0	323.31	16159000000	335	sp|Q14152|EIF3A_HUMAN
sp|Q14195|DPYL3_HUMAN	29.5857	29.8052	27.7913	29.65	29.2434	30.385	NaN	NaN	NaN	36	33	32	75.1	73.7	72.5	61.963	0	323.31	44707000000	511	sp|Q14195|DPYL3_HUMAN
sp|Q14203|DCTN1_HUMAN	25.4605	NaN	NaN	25.7115	24.5711	25.9157	NaN	NaN	NaN	15	15	15	17.1	17.1	17.1	141.69	0	129.57	1581300000	59	sp|Q14203|DCTN1_HUMAN
sp|Q14204|DYHC1_HUMAN	33.64	31.7516	31.5607	31.7291	32.2018	31.0689	NaN	NaN	25.7404	383	383	383	72	72	72	532.4	0	323.31	186250000000	3703	sp|Q14204|DYHC1_HUMAN
sp|Q14315|FLNC_HUMAN	34.0934	34.6152	33.0512	33.8065	33.3159	33.7165	NaN	NaN	NaN	252	252	233	77	77	74.7	291.02	0	323.31	633240000000	5643	sp|Q14315|FLNC_HUMAN
sp|Q14432|PDE3A_HUMAN	28.7672	29.0905	27.7991	29.662	26.0188	27.8383	28.4608	NaN	29.6525	1	1	1	1.9	1.9	1.9	124.98	0.0091946	1.7483	44085000000	172	sp|Q14432|PDE3A_HUMAN
sp|Q14444|CAPR1_HUMAN	25.8373	26.6223	26.483	NaN	NaN	24.6726	NaN	NaN	NaN	7	7	7	11.4	11.4	11.4	78.365	0	323.31	2096300000	74	sp|Q14444|CAPR1_HUMAN
sp|Q14566|MCM6_HUMAN	26.3044	26.4364	25.0865	24.2451	NaN	NaN	NaN	NaN	NaN	9	9	9	13.3	13.3	13.3	92.888	0	126.64	1754200000	55	sp|Q14566|MCM6_HUMAN
sp|Q14669|TRIPC_HUMAN	24.5364	23.5097	23.4898	NaN	NaN	NaN	NaN	NaN	NaN	10	10	10	7.7	7.7	7.7	220.43	0	42.957	351110000	30	sp|Q14669|TRIPC_HUMAN
sp|Q14694|UBP10_HUMAN	25.5857	25.2633	25.0929	NaN	NaN	23.3518	NaN	NaN	NaN	6	6	6	13	13	13	87.133	0	141.91	1062500000	42	sp|Q14694|UBP10_HUMAN
sp|Q14697|GANAB_HUMAN	29.9212	29.4894	31.1284	30.5368	31.443	30.2559	23.6208	NaN	30.2008	51	51	51	58.3	58.3	58.3	106.87	0	323.31	75168000000	1133	sp|Q14697|GANAB_HUMAN
sp|Q14764|MVP_HUMAN	28.0136	27.2112	25.0142	27.6433	26.7955	27.4237	NaN	NaN	NaN	16	16	16	28	28	28	99.326	0	323.31	8171700000	170	sp|Q14764|MVP_HUMAN
sp|Q14974|IMB1_HUMAN	30.055	29.7489	29.0024	29.3229	29.3001	29.6176	NaN	NaN	28.3282	40	40	40	50.8	50.8	50.8	97.169	0	323.31	44807000000	635	sp|Q14974|IMB1_HUMAN
sp|Q14C86|GAPD1_HUMAN	24.9041	24.2518	24.7797	24.6904	24.6551	24.3731	NaN	NaN	NaN	6	6	6	5.6	5.6	5.6	164.98	0	97.218	1128000000	40	sp|Q14C86|GAPD1_HUMAN
sp|Q15008|PSMD6_HUMAN	25.7313	26.5369	27.2365	26.655	26.513	27.1926	NaN	NaN	25.5439	11	11	11	31.1	31.1	31.1	45.531	0	323.31	5671500000	121	sp|Q15008|PSMD6_HUMAN
sp|Q15019|SEPT2_HUMAN	26.9653	27.6576	28.6106	25.9319	27.9506	27.0742	NaN	NaN	27.4309	18	18	18	51.2	51.2	51.2	41.487	0	323.31	10661000000	231	sp|Q15019|SEPT2_HUMAN
sp|Q15020|SART3_HUMAN	26.5663	24.8168	25.1599	NaN	24.3744	25.9005	NaN	NaN	NaN	12	12	12	16.1	16.1	16.1	109.93	0	275.58	1712200000	54	sp|Q15020|SART3_HUMAN
sp|Q15029|U5S1_HUMAN	26.3112	24.0493	24.8071	25.3173	24.0854	24.4314	NaN	NaN	NaN	19	17	17	26	24.9	24.9	109.43	0	132.84	1679300000	71	sp|Q15029|U5S1_HUMAN
sp|Q15041|AR6P1_HUMAN	25.5533	25.7997	26.9866	25.8977	NaN	26.2341	NaN	NaN	NaN	2	2	2	11.8	11.8	11.8	23.362	0	149	3707600000	36	sp|Q15041|AR6P1_HUMAN
sp|Q15046|SYK_HUMAN	27.2812	26.7997	26.6667	26.5806	26.0038	25.8815	NaN	NaN	27.1422	11	11	11	16.9	16.9	16.9	68.047	0	221.64	5287100000	67	sp|Q15046|SYK_HUMAN
sp|Q15056|IF4H_HUMAN	28.5197	28.3116	28.1387	28.1425	NaN	27.7352	NaN	NaN	NaN	10	10	10	50.4	50.4	50.4	27.385	0	323.31	15595000000	251	sp|Q15056|IF4H_HUMAN
sp|Q15084|PDIA6_HUMAN	28.1019	29.2907	30.9864	29.8929	31.2216	29.0861	25.3759	NaN	29.9299	30	30	30	64.5	64.5	64.5	48.121	0	323.31	62064000000	855	sp|Q15084|PDIA6_HUMAN
sp|Q15102|PA1B3_HUMAN	26.1193	26.7036	26.2471	26.822	NaN	26.9563	NaN	NaN	NaN	9	9	9	60.6	60.6	60.6	25.734	0	166.53	5068600000	101	sp|Q15102|PA1B3_HUMAN
sp|Q15121|PEA15_HUMAN	27.9045	26.7645	26.9764	27.7335	27.6432	27.226	NaN	NaN	NaN	10	10	10	75.4	75.4	75.4	15.04	0	297.89	11374000000	156	sp|Q15121|PEA15_HUMAN
sp|Q15149|PLEC_HUMAN;sp|P58107|EPIPL_HUMAN	30.9086	32.4344	33.0466	33.0019	32.8305	32.4583	NaN	NaN	26.3401	310	310	309	65.7	65.7	65.5	531.78	0	323.31	257810000000	3850	sp|Q15149|PLEC_HUMAN
sp|Q15181|IPYR_HUMAN	28.9662	27.1187	26.5023	27.7914	26.5686	27.103	NaN	NaN	28.0136	13	13	13	56.4	56.4	56.4	32.66	0	265	11583000000	218	sp|Q15181|IPYR_HUMAN
sp|Q15185|TEBP_HUMAN	27.8401	27.969	27.2086	27.5675	26.3442	27.2286	NaN	NaN	NaN	11	11	11	46.9	46.9	46.9	18.697	0	323.31	10630000000	158	sp|Q15185|TEBP_HUMAN
sp|Q15233|NONO_HUMAN	27.6112	28.0097	28.2035	27.1453	25.8885	27.4164	NaN	NaN	27.9098	9	8	8	29.1	29.1	29.1	54.231	0	199.21	9502900000	142	sp|Q15233|NONO_HUMAN
sp|Q15257|PTPA_HUMAN	24.9406	24.7686	25.068	25.0168	25.1104	25.6285	NaN	NaN	NaN	9	9	9	42.7	42.7	42.7	40.667	0	64.616	1738800000	81	sp|Q15257|PTPA_HUMAN
sp|Q15293|RCN1_HUMAN	24.4547	26.7934	27.7338	26.9728	29.0632	27.1592	NaN	NaN	NaN	11	11	11	53.8	53.8	53.8	38.89	0	323.31	9493400000	139	sp|Q15293|RCN1_HUMAN
sp|Q15365|PCBP1_HUMAN	27.9552	27.6573	27.7275	25.8767	27.1649	26.5186	NaN	NaN	25.8702	15	15	12	73.3	73.3	60.7	37.497	0	308.41	9065600000	131	sp|Q15365|PCBP1_HUMAN
sp|Q15366|PCBP2_HUMAN	28.2472	28.0532	27.9845	26.4642	27.0628	27.2769	NaN	NaN	26.4553	11	8	7	48.8	36.4	36.4	38.58	0	270.54	11813000000	148	sp|Q15366|PCBP2_HUMAN
sp|Q15369|ELOC_HUMAN	26.0604	27.7081	25.164	26.8779	25.2187	27.0507	NaN	NaN	24.4494	4	4	4	55.4	55.4	55.4	12.473	0	41.348	6997500000	51	sp|Q15369|ELOC_HUMAN
sp|Q15370|ELOB_HUMAN	26.6252	25.9136	26.1591	25.4517	25.6627	26.8987	NaN	NaN	NaN	9	9	9	66.1	66.1	66.1	13.133	0	323.31	4542100000	91	sp|Q15370|ELOB_HUMAN
sp|Q15393|SF3B3_HUMAN	25.7861	24.6425	25.9513	NaN	NaN	25.4818	NaN	NaN	26.832	9	9	9	11.3	11.3	11.3	135.58	0	212.14	1650100000	58	sp|Q15393|SF3B3_HUMAN
sp|Q15417|CNN3_HUMAN	26.5055	25.8828	24.9811	26.1358	NaN	25.0669	NaN	NaN	NaN	10	10	9	23.4	23.4	23.4	36.413	0	155.97	3134800000	106	sp|Q15417|CNN3_HUMAN
sp|Q15435|PP1R7_HUMAN	NaN	22.5167	23.6185	24.3128	24.4903	23.6392	NaN	NaN	NaN	2	2	2	7.5	7.5	7.5	41.564	0	12.496	624060000	32	sp|Q15435|PP1R7_HUMAN
sp|Q15437|SC23B_HUMAN	26.0013	26.5956	26.1215	24.7159	25.5775	25.8349	NaN	NaN	NaN	15	15	12	29.7	29.7	26.2	86.478	0	323.31	2969900000	83	sp|Q15437|SC23B_HUMAN
sp|Q15631|TSN_HUMAN	27.4281	28.0445	28.2414	27.7196	25.9651	27.5189	NaN	NaN	NaN	16	16	16	77.6	77.6	77.6	26.183	0	323.31	12455000000	221	sp|Q15631|TSN_HUMAN
sp|Q15691|MARE1_HUMAN	28.0522	27.3466	27.2295	27.3289	27.0762	27.353	NaN	NaN	NaN	13	13	13	58.2	58.2	58.2	29.999	0	323.31	9659500000	215	sp|Q15691|MARE1_HUMAN
sp|Q15717|ELAV1_HUMAN	26.2859	26.3809	26.5142	25.0706	NaN	24.7003	NaN	NaN	NaN	7	7	7	26.7	26.7	26.7	36.091	0	73.834	3093000000	50	sp|Q15717|ELAV1_HUMAN
sp|Q15758|AAAT_HUMAN	23.4242	23.6571	24.7221	23.749	23.343	NaN	NaN	NaN	NaN	2	2	2	4.4	4.4	4.4	56.598	0	16.393	547650000	27	sp|Q15758|AAAT_HUMAN
sp|Q15836|VAMP3_HUMAN;sp|P63027|VAMP2_HUMAN;sp|P23763|VAMP1_HUMAN	24.956	26.9172	26.6994	26.4733	26.9826	NaN	NaN	NaN	NaN	7	7	7	49	49	49	11.309	0	251.36	5875900000	83	sp|Q15836|VAMP3_HUMAN;sp|P63027|VAMP2_HUMAN
sp|Q16181|SEPT7_HUMAN;sp|Q6ZU15|SEP14_HUMAN	25.0042	26.746	27.066	26.1194	27.2738	26.758	NaN	NaN	26.4651	10	10	10	29.1	29.1	29.1	50.679	0	323.31	5678600000	155	sp|Q16181|SEPT7_HUMAN
sp|Q16401|PSMD5_HUMAN	26.2722	26.5816	24.5168	25.938	25.6056	26.1898	NaN	NaN	NaN	14	14	14	38.5	38.5	38.5	56.195	0	318.23	3542200000	88	sp|Q16401|PSMD5_HUMAN
sp|Q16531|DDB1_HUMAN	28.125	25.2345	27.4572	26.3639	27.6054	28.6365	NaN	NaN	28.4432	21	21	21	22.5	22.5	22.5	126.97	0	282.56	9290400000	258	sp|Q16531|DDB1_HUMAN
sp|Q16555|DPYL2_HUMAN	30.6049	30.7007	29.6674	30.6742	30.51	31.2058	NaN	NaN	24.6272	41	41	37	76.9	76.9	75.5	62.293	0	323.31	87613000000	771	sp|Q16555|DPYL2_HUMAN
sp|Q16629|SRSF7_HUMAN	26.9391	27.2801	27.0506	26.4468	27.0068	26.6413	NaN	NaN	27.904	7	6	6	39.1	39.1	39.1	27.366	0	102.04	7386600000	89	sp|Q16629|SRSF7_HUMAN
sp|Q16643|DREB_HUMAN	25.3781	25.7645	25.8326	25.0571	NaN	NaN	NaN	NaN	NaN	5	5	5	12.2	12.2	12.2	71.428	0	117.2	1429400000	37	sp|Q16643|DREB_HUMAN
sp|Q16658|FSCN1_HUMAN	29.2614	29.0901	28.9069	29.2751	28.3021	29.2948	NaN	NaN	30.1044	28	28	28	63.9	63.9	63.9	54.529	0	323.31	32280000000	483	sp|Q16658|FSCN1_HUMAN
sp|Q16698|DECR_HUMAN	25.8574	25.6363	26.4178	26.3308	26.9342	26.2681	NaN	NaN	NaN	10	10	10	26.6	26.6	26.6	36.067	0	246.14	4226300000	85	sp|Q16698|DECR_HUMAN
sp|Q16777|H2A2C_HUMAN;sp|Q6FI13|H2A2A_HUMAN	27.5664	27.4733	27.8457	28.7182	27.9352	27.4635	NaN	26.0669	29.0188	6	6	1	58.1	58.1	22.5	13.988	0	136.2	17940000000	174	sp|Q16777|H2A2C_HUMAN;sp|Q6FI13|H2A2A_HUMAN
sp|Q16831|UPP1_HUMAN	26.8812	26.7066	NaN	24.6172	26.3432	26.369	NaN	NaN	NaN	13	13	13	50	50	50	33.934	0	323.31	3737300000	64	sp|Q16831|UPP1_HUMAN
sp|Q16836|HCDH_HUMAN	25.4219	25.7472	26.4286	25.8233	25.7145	25.5658	NaN	NaN	NaN	5	5	5	26.8	26.8	26.8	34.293	0	111.5	3281000000	50	sp|Q16836|HCDH_HUMAN
sp|Q16851|UGPA_HUMAN	25.2926	26.0489	25.2785	25.7372	25.7203	25.8164	NaN	NaN	25.5933	11	11	11	23.2	23.2	23.2	56.94	0	153.41	3089800000	65	sp|Q16851|UGPA_HUMAN
sp|Q16881|TRXR1_HUMAN;sp|Q9NNW7|TRXR2_HUMAN	29.1697	29.1169	28.4032	29.3095	29.5124	29.6737	NaN	NaN	NaN	33	33	33	66.4	66.4	66.4	70.905	0	323.31	33317000000	530	sp|Q16881|TRXR1_HUMAN
sp|Q1KMD3|HNRL2_HUMAN	24.6671	24.4869	24.5863	NaN	24.4807	NaN	NaN	NaN	NaN	6	6	6	14.5	14.5	14.5	85.104	0	128.47	870130000	39	sp|Q1KMD3|HNRL2_HUMAN
sp|Q460N5|PAR14_HUMAN	24.4762	23.8508	23.9369	NaN	NaN	NaN	NaN	NaN	NaN	7	7	7	5.9	5.9	5.9	202.8	0	55.151	445960000	40	sp|Q460N5|PAR14_HUMAN
sp|Q4J6C6|PPCEL_HUMAN	24.5054	24.7252	NaN	24.1798	23.7884	23.943	NaN	NaN	NaN	7	7	7	17.2	17.2	17.2	83.926	0	72.746	978970000	50	sp|Q4J6C6|PPCEL_HUMAN
sp|Q53GQ0|DHB12_HUMAN	24.6144	25.6336	27.3306	26.0639	25.9655	25.0059	NaN	NaN	NaN	7	7	7	33	33	33	34.324	0	78.998	3750800000	96	sp|Q53GQ0|DHB12_HUMAN
sp|Q58FF8|H90B2_HUMAN	28.4355	27.9281	27.1018	27.2798	27.6896	27.2693	NaN	NaN	27.593	16	3	3	24.9	5	5	44.348	0	163.12	11424000000	156	sp|Q58FF8|H90B2_HUMAN
sp|Q5T4S7|UBR4_HUMAN	30.4137	28.3495	27.3843	28.1863	27.7707	27.8321	NaN	NaN	NaN	123	123	123	32.9	32.9	32.9	573.83	0	323.31	16650000000	629	sp|Q5T4S7|UBR4_HUMAN
sp|Q5VW36|FOCAD_HUMAN	24.2659	23.6192	24.5772	23.9734	NaN	NaN	NaN	NaN	NaN	6	6	6	5.5	5.5	5.5	200.07	0	24.513	619860000	26	sp|Q5VW36|FOCAD_HUMAN
sp|Q5VYK3|ECM29_HUMAN	27.5344	27.9454	27.7739	28.0896	26.1277	27.378	NaN	NaN	NaN	33	33	33	25.4	25.4	25.4	204.29	0	323.31	8716800000	195	sp|Q5VYK3|ECM29_HUMAN
sp|Q63HN8|RN213_HUMAN	28.4303	24.8342	24.9576	24.3905	24.3588	NaN	NaN	NaN	NaN	49	49	49	13.3	13.3	13.3	591.4	0	323.31	2765500000	149	sp|Q63HN8|RN213_HUMAN
sp|Q6DD88|ATLA3_HUMAN	24.6939	24.3581	25.1401	24.9586	24.7619	24.1285	NaN	NaN	NaN	6	6	6	24.4	24.4	24.4	60.541	0	271.89	1233500000	51	sp|Q6DD88|ATLA3_HUMAN
sp|Q6IAA8|LTOR1_HUMAN	24.192	23.7609	26.8721	24.2585	25.8929	24.2628	NaN	NaN	NaN	7	7	7	60.2	60.2	60.2	17.745	0	131.71	2580400000	65	sp|Q6IAA8|LTOR1_HUMAN
sp|Q6IBS0|TWF2_HUMAN	24.9193	25.7721	26.1901	25.8566	NaN	26.2404	NaN	NaN	NaN	8	7	7	43.8	41.8	41.8	39.548	0	323.31	2601300000	85	sp|Q6IBS0|TWF2_HUMAN
sp|Q6NW29|RWDD4_HUMAN	23.2383	23.209	22.7338	NaN	NaN	NaN	NaN	NaN	NaN	2	2	2	15.4	15.4	15.4	21.25	0	68.482	292900000	8	sp|Q6NW29|RWDD4_HUMAN
sp|Q6NZI2|CAVN1_HUMAN	26.2003	26.016	25.1015	25.2914	NaN	25.3527	NaN	NaN	NaN	5	5	5	12.1	12.1	12.1	43.476	0	24.893	2435100000	35	sp|Q6NZI2|CAVN1_HUMAN
sp|Q6P2E9|EDC4_HUMAN	24.7563	24.7331	25.2344	24.9848	NaN	24.3786	NaN	NaN	NaN	9	9	9	11.3	11.3	11.3	151.66	0	127.69	1188300000	69	sp|Q6P2E9|EDC4_HUMAN
sp|Q6P2Q9|PRP8_HUMAN	25.3493	26.4759	25.5697	27.2177	25.0542	25.699	NaN	NaN	25.191	27	27	27	14.5	14.5	14.5	273.6	0	263.6	3292800000	139	sp|Q6P2Q9|PRP8_HUMAN
sp|Q6PKG0|LARP1_HUMAN;sp|Q659C4|LAR1B_HUMAN	25.239	24.2762	25.7603	25.5134	NaN	25.5082	NaN	NaN	NaN	8	8	8	12.5	12.5	12.5	123.51	0	139.34	1521800000	71	sp|Q6PKG0|LARP1_HUMAN
sp|Q709C8|VP13C_HUMAN	24.8165	23.9805	24.8723	24.4473	25.7688	NaN	NaN	NaN	NaN	13	13	13	5.5	5.5	5.5	422.39	0	87.037	957760000	46	sp|Q709C8|VP13C_HUMAN
sp|Q71U36|TBA1A_HUMAN;sp|Q13748|TBA3C_HUMAN;sp|Q6PEY2|TBA3E_HUMAN	32.9628	33.1938	32.7224	33.0261	32.7062	33.1652	26.5485	25.1105	32.9788	46	46	2	74.5	74.5	6.2	50.135	0	323.31	478700000000	3579	sp|Q71U36|TBA1A_HUMAN;sp|Q13748|TBA3C_HUMAN;sp|Q6PEY2|TBA3E_HUMAN
sp|Q7KZ85|SPT6H_HUMAN	24.4514	25.039	25.2487	24.6654	NaN	NaN	NaN	NaN	NaN	10	10	10	9.7	9.7	9.7	199.07	0	67.498	1051800000	32	sp|Q7KZ85|SPT6H_HUMAN
sp|Q7KZF4|SND1_HUMAN	29.1984	28.8326	29.976	28.2494	29.6942	28.0714	NaN	NaN	25.6226	43	43	43	59	59	59	102	0	323.31	25394000000	534	sp|Q7KZF4|SND1_HUMAN
sp|Q7L2H7|EIF3M_HUMAN	27.8504	26.7753	27.0837	25.9897	25.5998	25.7935	NaN	NaN	NaN	20	20	20	43.9	43.9	43.9	42.502	0	279.03	5550100000	151	sp|Q7L2H7|EIF3M_HUMAN
sp|Q7L523|RRAGA_HUMAN;sp|Q5VZM2|RRAGB_HUMAN	24.7385	24.1139	23.2401	NaN	23.9065	NaN	NaN	NaN	NaN	3	3	3	12.5	12.5	12.5	36.566	0	53.703	662140000	28	sp|Q7L523|RRAGA_HUMAN
sp|Q7L576|CYFP1_HUMAN	26.3146	NaN	25.7186	25.7367	25.3261	26.0889	NaN	NaN	NaN	13	13	10	11.6	11.6	8.8	145.18	0	116.06	2077500000	78	sp|Q7L576|CYFP1_HUMAN
sp|Q7L5N1|CSN6_HUMAN	26.065	25.1551	25.5968	24.9259	NaN	25.184	NaN	NaN	NaN	7	7	7	23.9	23.9	23.9	36.163	0	155.11	2052900000	47	sp|Q7L5N1|CSN6_HUMAN
sp|Q7Z6Z7|HUWE1_HUMAN;sp|A5YM72|CRNS1_HUMAN	30.9405	28.8839	27.9938	28.0194	28.0849	27.9388	NaN	NaN	25.5876	102	102	102	33.7	33.7	33.7	481.89	0	323.31	22035000000	675	sp|Q7Z6Z7|HUWE1_HUMAN
sp|Q86VP6|CAND1_HUMAN;sp|O75155|CAND2_HUMAN	29.7543	25.3105	28.5539	27.7812	29.4017	30.4762	NaN	NaN	27.0332	49	49	49	42.6	42.6	42.6	136.37	0	323.31	27880000000	569	sp|Q86VP6|CAND1_HUMAN
sp|Q86Y82|STX12_HUMAN	24.346	24.7332	25.3006	NaN	24.8984	NaN	NaN	NaN	NaN	7	7	7	34.4	34.4	34.4	31.642	0	135.58	1149800000	36	sp|Q86Y82|STX12_HUMAN
sp|Q8N163|CCAR2_HUMAN	27.4642	26.8879	26.5993	NaN	26.1484	27.032	NaN	NaN	27.5004	17	17	17	25.2	25.2	25.2	102.9	0	323.31	5146900000	127	sp|Q8N163|CCAR2_HUMAN
sp|Q8N1G4|LRC47_HUMAN	27.0764	27.1536	26.9633	26.7517	26.4454	26.9451	NaN	NaN	NaN	15	15	15	38.4	38.4	38.4	63.472	0	323.31	6333500000	173	sp|Q8N1G4|LRC47_HUMAN
sp|Q8NBJ7|SUMF2_HUMAN	24.9703	25.0752	25.1868	25.0617	NaN	24.5466	NaN	NaN	NaN	6	6	6	20.9	20.9	20.9	33.843	0	116.53	1635100000	48	sp|Q8NBJ7|SUMF2_HUMAN
sp|Q8NBS9|TXND5_HUMAN	25.8971	27.4875	28.2143	28.4997	28.1368	27.6638	NaN	NaN	27.3405	17	17	17	43.3	43.3	43.3	47.628	0	323.31	12131000000	218	sp|Q8NBS9|TXND5_HUMAN
sp|Q8NC51|PAIRB_HUMAN	25.5241	26.235	27.5205	26.3225	25.711	24.9916	NaN	NaN	25.9024	14	14	14	42.4	42.4	42.4	44.965	0	193.4	3952100000	135	sp|Q8NC51|PAIRB_HUMAN
sp|Q8NCM8|DYHC2_HUMAN	25.4368	25.3083	26.1214	NaN	NaN	NaN	NaN	NaN	NaN	8	8	8	2.4	2.4	2.4	492.62	0	22.902	1543100000	26	sp|Q8NCM8|DYHC2_HUMAN
sp|Q8NCW5|NNRE_HUMAN	25.8767	25.7491	25.7075	26.3875	25.5893	26.1452	NaN	NaN	NaN	10	10	10	57.3	57.3	57.3	31.674	0	91.922	3686700000	83	sp|Q8NCW5|NNRE_HUMAN
sp|Q8TEX9|IPO4_HUMAN	26.1218	22.8548	23.8057	NaN	24.4061	21.8652	NaN	NaN	25.8301	12	12	12	17.4	17.4	17.4	118.71	0	199.41	1373200000	77	sp|Q8TEX9|IPO4_HUMAN
sp|Q8WUM4|PDC6I_HUMAN	27.3526	27.1913	26.5838	26.8681	26.8332	27.0024	NaN	NaN	NaN	17	17	17	30.6	30.6	30.6	96.022	0	323.31	5897200000	117	sp|Q8WUM4|PDC6I_HUMAN
sp|Q8WXF1|PSPC1_HUMAN	25.1711	25.2152	24.2016	NaN	NaN	24.1789	NaN	NaN	NaN	5	5	5	15.5	15.5	15.5	58.743	0	122.46	1101600000	48	sp|Q8WXF1|PSPC1_HUMAN
sp|Q92499|DDX1_HUMAN	26.926	26.8353	27.0095	26.3847	26.7715	26.4067	NaN	NaN	26.9872	12	12	12	25.3	25.3	25.3	82.431	0	323.31	5759400000	156	sp|Q92499|DDX1_HUMAN
sp|Q92598|HS105_HUMAN	30.0515	29.2841	28.8752	28.3712	28.805	28.5732	NaN	NaN	26.0956	40	40	36	46	46	43.2	96.864	0	323.31	28245000000	512	sp|Q92598|HS105_HUMAN
sp|Q92616|GCN1_HUMAN	29.1321	30.1396	30.3002	29.7038	29.6925	29.0826	NaN	NaN	NaN	93	93	93	41.1	41.1	41.1	292.75	0	323.31	37941000000	884	sp|Q92616|GCN1_HUMAN
sp|Q92688|AN32B_HUMAN	26.9348	26.5671	NaN	26.4983	26.1192	26.2269	NaN	NaN	25.8734	10	7	7	42.2	34.3	34.3	28.787	0	148.31	4831200000	96	sp|Q92688|AN32B_HUMAN
sp|Q92820|GGH_HUMAN	24.6633	24.3568	25.3804	24.7728	23.9436	25.079	NaN	NaN	NaN	6	6	6	22	22	22	35.964	0	31.968	1545400000	79	sp|Q92820|GGH_HUMAN
sp|Q92841|DDX17_HUMAN	25.9253	26.5184	24.8628	NaN	24.9291	24.5215	NaN	NaN	NaN	13	9	9	19.8	15.1	15.1	80.272	0	130.16	2160000000	53	sp|Q92841|DDX17_HUMAN
sp|Q92900|RENT1_HUMAN	26.2152	24.8033	25.4233	NaN	24.7931	25.6802	NaN	NaN	NaN	12	12	12	14.3	14.3	14.3	124.34	0	134.58	1567500000	55	sp|Q92900|RENT1_HUMAN
sp|Q92945|FUBP2_HUMAN	26.6699	27.1562	26.3208	26.7941	25.9293	25.9276	NaN	NaN	27.346	10	10	8	19.1	19.1	15.5	73.114	0	266.76	4663200000	75	sp|Q92945|FUBP2_HUMAN
sp|Q92973|TNPO1_HUMAN	27.0553	26.6492	26.4814	25.8568	26.6109	26.3428	NaN	NaN	24.8717	22	22	18	36	36	30.5	102.35	0	323.31	5152700000	169	sp|Q92973|TNPO1_HUMAN
sp|Q92974|ARHG2_HUMAN	25.5385	25.2141	26.1795	24.8181	25.6838	24.632	NaN	NaN	NaN	12	12	12	19.6	19.6	19.6	111.54	0	234.39	1859600000	78	sp|Q92974|ARHG2_HUMAN
sp|Q93008|USP9X_HUMAN;sp|O00507|USP9Y_HUMAN	28.7828	27.9334	26.6596	27.5443	27.5042	25.9421	NaN	NaN	NaN	54	54	54	28.8	28.8	28.8	292.28	0	323.31	8209200000	254	sp|Q93008|USP9X_HUMAN
sp|Q93009|UBP7_HUMAN	25.4192	NaN	23.3069	23.534	25.0093	24.907	NaN	NaN	NaN	11	11	11	16.2	16.2	16.2	128.3	0	169.24	976070000	56	sp|Q93009|UBP7_HUMAN
sp|Q969H8|MYDGF_HUMAN	25.8532	NaN	27.987	26.5395	27.8724	27.6636	NaN	NaN	26.672	4	4	4	26	26	26	18.795	0	172.69	9167400000	111	sp|Q969H8|MYDGF_HUMAN
sp|Q96A72|MGN2_HUMAN;sp|P61326|MGN_HUMAN	25.795	24.9285	26.0144	26.1537	24.9832	26.243	NaN	NaN	NaN	8	8	8	57.4	57.4	57.4	17.276	0	72.091	3405200000	104	sp|Q96A72|MGN2_HUMAN;sp|P61326|MGN_HUMAN
sp|Q96AE4|FUBP1_HUMAN	25.2142	26.0998	25.3596	NaN	24.5872	NaN	NaN	NaN	NaN	8	6	6	14.4	10.4	10.4	67.56	0	149.16	1612700000	32	sp|Q96AE4|FUBP1_HUMAN
sp|Q96AG4|LRC59_HUMAN	22.9002	25.2539	27.6753	26.1726	26.9887	23.5353	NaN	NaN	NaN	15	15	15	52.4	52.4	52.4	34.93	0	209.21	4208300000	125	sp|Q96AG4|LRC59_HUMAN
sp|Q96C90|PP14B_HUMAN	25.0371	24.475	23.7392	25.7413	NaN	24.2435	NaN	NaN	NaN	5	5	5	43.5	43.5	43.5	15.911	0	242.19	1469100000	78	sp|Q96C90|PP14B_HUMAN
sp|Q96CW1|AP2M1_HUMAN	24.0627	24.9409	25.3226	NaN	NaN	NaN	NaN	NaN	NaN	7	7	7	23.9	23.9	23.9	49.654	0	111.73	1186400000	42	sp|Q96CW1|AP2M1_HUMAN
sp|Q96FQ6|S10AG_HUMAN	25.2445	27.0114	NaN	26.4249	25.5363	25.046	NaN	NaN	NaN	11	11	11	73.8	73.8	73.8	11.801	0	228.16	4229300000	84	sp|Q96FQ6|S10AG_HUMAN
sp|Q96FW1|OTUB1_HUMAN	28.2829	27.3808	27.1176	27.5913	27.2904	27.3506	NaN	NaN	27.026	9	9	9	33.9	33.9	33.9	31.284	0	323.31	10991000000	182	sp|Q96FW1|OTUB1_HUMAN
sp|Q96IU4|ABHEB_HUMAN	25.1802	24.5114	NaN	25.2523	24.3122	25.0842	NaN	NaN	NaN	5	5	5	34.8	34.8	34.8	22.345	0	46.706	1519600000	42	sp|Q96IU4|ABHEB_HUMAN
sp|Q96KP4|CNDP2_HUMAN	27.8727	27.9631	27.5227	27.8636	28.1841	28.1054	NaN	NaN	27.3493	22	22	22	48.2	48.2	48.2	52.878	0	323.31	13587000000	315	sp|Q96KP4|CNDP2_HUMAN
sp|Q96P70|IPO9_HUMAN	28.3214	27.5026	27.0134	NaN	27.8565	27.1157	NaN	NaN	NaN	12	12	12	16.5	16.5	16.5	115.96	0	323.31	8822600000	115	sp|Q96P70|IPO9_HUMAN
sp|Q96PU8|QKI_HUMAN	25.352	25.8636	25.9359	NaN	24.3758	25.6632	NaN	NaN	NaN	3	3	3	13.8	13.8	13.8	37.67	0	59.572	2246600000	56	sp|Q96PU8|QKI_HUMAN
sp|Q96QK1|VPS35_HUMAN	26.4759	27.1441	26.9087	27.1666	27.7115	26.8899	NaN	NaN	23.1774	21	21	21	31.5	31.5	31.5	91.706	0	323.31	6593700000	215	sp|Q96QK1|VPS35_HUMAN
sp|Q96QR8|PURB_HUMAN;sp|Q9UJV8|PURG_HUMAN	25.9044	25.2725	26.3422	24.6861	NaN	25.7429	NaN	NaN	NaN	10	10	8	35.6	35.6	32.4	33.24	0	93.489	2346100000	70	sp|Q96QR8|PURB_HUMAN
sp|Q96TA1|NIBL1_HUMAN	27.0819	27.1613	26.4095	27.2854	26.3646	26.0513	NaN	NaN	NaN	20	20	20	37.1	37.1	37.1	84.137	0	323.31	5818300000	159	sp|Q96TA1|NIBL1_HUMAN
sp|Q99460|PSMD1_HUMAN	27.3432	26.2315	25.7527	26.442	27.1349	26.3767	NaN	NaN	NaN	23	23	23	34	34	34	105.84	0	266.75	5070400000	120	sp|Q99460|PSMD1_HUMAN
sp|Q99497|PARK7_HUMAN	29.4523	29.4274	29.8026	29.5142	29.334	29.8506	NaN	NaN	29.9296	22	22	22	89.4	89.4	89.4	19.891	0	323.31	49253000000	592	sp|Q99497|PARK7_HUMAN
sp|Q99536|VAT1_HUMAN	NaN	26.7995	27.7304	27.1011	28.7266	27.1754	NaN	NaN	NaN	13	13	13	43.8	43.8	43.8	41.92	0	310.63	8451700000	156	sp|Q99536|VAT1_HUMAN
sp|Q99627|CSN8_HUMAN	26.3901	25.8359	25.721	26.1829	25.3017	25.4829	NaN	NaN	NaN	8	8	8	63.6	63.6	63.6	23.225	0	192.24	3511200000	93	sp|Q99627|CSN8_HUMAN
sp|Q99729|ROAA_HUMAN	25.3139	24.9204	25.3416	25.4946	NaN	NaN	NaN	NaN	NaN	7	7	7	19	19	19	36.224	0	68.167	1514700000	51	sp|Q99729|ROAA_HUMAN
sp|Q99733|NP1L4_HUMAN	27.4091	27.5272	25.7928	26.9496	26.3072	27.2721	NaN	NaN	26.8007	12	12	10	38.4	38.4	35.5	42.823	0	238.11	7535900000	189	sp|Q99733|NP1L4_HUMAN
sp|Q99829|CPNE1_HUMAN	26.9988	27.1488	26.6752	27.1388	25.9039	26.9673	NaN	NaN	24.5617	11	11	11	27.4	27.4	27.4	59.058	0	323.31	7075800000	213	sp|Q99829|CPNE1_HUMAN
sp|Q99832|TCPH_HUMAN	29.6084	29.6973	28.8318	29.1981	28.5169	29.6481	NaN	NaN	28.1251	40	40	40	65.7	65.7	65.7	59.366	0	323.31	37981000000	679	sp|Q99832|TCPH_HUMAN
sp|Q99873|ANM1_HUMAN	26.2923	26.168	27.3862	26.066	25.4905	25.982	NaN	NaN	27.2423	11	11	11	31.3	31.3	31.3	42.461	0	153.13	5070200000	106	sp|Q99873|ANM1_HUMAN
sp|Q9BPX5|ARP5L_HUMAN	25.1037	24.7816	24.8807	24.9219	NaN	24.4593	NaN	NaN	NaN	3	3	3	41.2	41.2	41.2	16.941	0	197.82	1471500000	40	sp|Q9BPX5|ARP5L_HUMAN
sp|Q9BQG0|MBB1A_HUMAN	26.0943	23.368	25.032	26.4093	24.5245	24.8932	NaN	NaN	25.6504	16	16	16	15.2	15.2	15.2	148.85	0	321.96	2056000000	93	sp|Q9BQG0|MBB1A_HUMAN
sp|Q9BR76|COR1B_HUMAN	25.3567	26.1435	25.9785	NaN	NaN	25.8308	NaN	NaN	NaN	10	10	10	28.2	28.2	28.2	54.234	0	163.42	2493300000	78	sp|Q9BR76|COR1B_HUMAN
sp|Q9BRA2|TXD17_HUMAN	27.2145	26.8591	25.9552	26.9665	25.7168	26.642	NaN	NaN	NaN	10	10	10	84.6	84.6	84.6	13.941	0	248.47	6773800000	105	sp|Q9BRA2|TXD17_HUMAN
sp|Q9BSJ8|ESYT1_HUMAN	24.1427	NaN	27.8855	23.428	27.8989	26.9103	NaN	NaN	NaN	21	21	21	31.4	31.4	31.4	122.85	0	323.31	3798200000	124	sp|Q9BSJ8|ESYT1_HUMAN
sp|Q9BTT0|AN32E_HUMAN	25.9722	25.4513	24.423	25.4903	24.9276	25.3467	NaN	NaN	NaN	7	7	7	26.9	26.9	26.9	30.692	0	169.71	2340400000	75	sp|Q9BTT0|AN32E_HUMAN
sp|Q9BTV4|TMM43_HUMAN	NaN	25.751	27.5252	26.3141	27.6431	25.5667	NaN	NaN	NaN	10	10	10	41.2	41.2	41.2	44.875	0	270.43	4513800000	82	sp|Q9BTV4|TMM43_HUMAN
sp|Q9BUJ2|HNRL1_HUMAN	26.0567	26.2751	25.6936	NaN	24.7344	24.028	NaN	NaN	25.5299	11	11	11	19.5	19.5	19.5	95.737	0	323.31	2300200000	73	sp|Q9BUJ2|HNRL1_HUMAN
sp|Q9BVA1|TBB2B_HUMAN	31.9047	32.3848	31.617	31.9771	32.6086	32.726	25.5889	NaN	32.4615	41	41	2	81.3	81.3	3.6	49.953	0	323.31	323380000000	2791	sp|Q9BVA1|TBB2B_HUMAN
sp|Q9BWD1|THIC_HUMAN	26.2325	27.3903	27.7517	27.2712	26.679	28.1463	NaN	NaN	NaN	11	11	11	53.9	53.9	53.9	41.35	0	323.31	8944500000	175	sp|Q9BWD1|THIC_HUMAN
sp|Q9BX68|HINT2_HUMAN	24.8327	24.5828	25.6598	25.3059	26.1269	26.3615	NaN	NaN	NaN	5	5	5	47.2	47.2	47.2	17.162	0	87.783	3017600000	67	sp|Q9BX68|HINT2_HUMAN
sp|Q9BXJ9|NAA15_HUMAN;sp|Q6N069|NAA16_HUMAN	26.2825	25.4901	24.1578	24.7674	23.6535	24.5064	NaN	NaN	NaN	13	13	13	20.1	20.1	20.1	101.27	0	86.159	1813400000	58	sp|Q9BXJ9|NAA15_HUMAN
sp|Q9BXP5|SRRT_HUMAN	25.3639	25.3015	25.498	NaN	NaN	NaN	NaN	NaN	NaN	6	6	6	12.8	12.8	12.8	100.67	0	79.412	1139700000	37	sp|Q9BXP5|SRRT_HUMAN
sp|Q9BY32|ITPA_HUMAN	25.483	25.0247	25.3945	25.5233	NaN	NaN	NaN	NaN	NaN	9	9	9	54.1	54.1	54.1	21.445	0	151.11	1759500000	68	sp|Q9BY32|ITPA_HUMAN
sp|Q9BZQ8|NIBAN_HUMAN	NaN	NaN	25.8089	24.9205	28.6617	26.4716	NaN	NaN	NaN	23	23	23	34.4	34.4	34.4	103.13	0	323.31	4387800000	127	sp|Q9BZQ8|NIBAN_HUMAN
sp|Q9BZZ5|API5_HUMAN	24.607	23.9707	23.3414	24.8168	NaN	24.2422	NaN	NaN	NaN	6	6	6	17.7	17.7	17.7	59.004	0	103.28	993310000	56	sp|Q9BZZ5|API5_HUMAN
sp|Q9C0B1|FTO_HUMAN	23.2968	22.7698	21.6139	NaN	NaN	NaN	NaN	NaN	NaN	3	3	3	6.1	6.1	6.1	58.281	0	8.9593	170290000	25	sp|Q9C0B1|FTO_HUMAN
sp|Q9C0C9|UBE2O_HUMAN	25.9063	24.6063	24.4633	25.5034	24.2194	25.3017	NaN	NaN	NaN	9	9	9	11.8	11.8	11.8	141.29	0	80.482	1619500000	54	sp|Q9C0C9|UBE2O_HUMAN
sp|Q9H0U4|RAB1B_HUMAN;sp|Q92928|RAB1C_HUMAN	27.7136	27.8106	28.4326	27.5987	26.9988	27.7696	NaN	NaN	NaN	18	18	7	74.1	74.1	32.8	22.171	0	317.9	13501000000	215	sp|Q9H0U4|RAB1B_HUMAN;sp|Q92928|RAB1C_HUMAN
sp|Q9H0W9|CK054_HUMAN	24.4485	23.5261	24.0953	23.7296	NaN	24.4614	NaN	NaN	NaN	5	5	5	23.8	23.8	23.8	35.117	0	60.807	773230000	39	sp|Q9H0W9|CK054_HUMAN
sp|Q9H299|SH3L3_HUMAN	27.1515	27.4241	26.9423	27.0278	26.1074	26.7706	NaN	NaN	NaN	9	9	9	86	86	86	10.438	0	239	8415600000	106	sp|Q9H299|SH3L3_HUMAN
sp|Q9H2M9|RBGPR_HUMAN;sp|P13994|CC130_HUMAN	25.4088	24.7054	25.1708	25.7988	24.1289	24.8254	NaN	NaN	NaN	17	17	17	18.3	18.3	18.3	155.98	0	257.15	1536900000	67	sp|Q9H2M9|RBGPR_HUMAN
sp|Q9H2U1|DHX36_HUMAN	24.0292	23.199	23.7835	NaN	NaN	NaN	NaN	NaN	NaN	3	3	3	4.1	4.1	4.1	114.76	0	29.684	284110000	12	sp|Q9H2U1|DHX36_HUMAN
sp|Q9H3K6|BOLA2_HUMAN	25.4812	26.636	24.9626	26.4231	NaN	26.0759	NaN	NaN	NaN	5	5	5	69.8	69.8	69.8	10.116	0	147.82	3961500000	52	sp|Q9H3K6|BOLA2_HUMAN
sp|Q9HB07|MYG1_HUMAN	25.541	24.921	25.8376	NaN	NaN	25.1817	NaN	NaN	NaN	8	8	8	24.5	24.5	24.5	42.449	0	38.33	1649500000	33	sp|Q9HB07|MYG1_HUMAN
sp|Q9HB71|CYBP_HUMAN	28.1858	29.0324	27.2826	28.0799	26.1132	27.9758	NaN	NaN	NaN	12	12	12	56.1	56.1	56.1	26.21	0	323.31	17030000000	201	sp|Q9HB71|CYBP_HUMAN
sp|Q9HC38|GLOD4_HUMAN	26.9783	26.3327	25.5194	26.0663	26.1924	26.578	NaN	NaN	26.3395	12	12	12	35.5	35.5	35.5	34.793	0	323.31	5237400000	132	sp|Q9HC38|GLOD4_HUMAN
sp|Q9HCJ6|VAT1L_HUMAN	24.4133	23.6713	23.9536	NaN	NaN	23.5422	NaN	NaN	NaN	6	6	6	21	21	21	45.899	0	40.993	689020000	40	sp|Q9HCJ6|VAT1L_HUMAN
sp|Q9NP79|VTA1_HUMAN	25.4815	25.7598	25.8116	24.8673	24.8553	25.3981	NaN	NaN	NaN	5	5	5	26.1	26.1	26.1	33.879	0	72.583	2216100000	53	sp|Q9NP79|VTA1_HUMAN
sp|Q9NP97|DLRB1_HUMAN;sp|Q8TF09|DLRB2_HUMAN	25.9015	26.4837	26.3489	26.4864	24.9126	25.8784	NaN	NaN	NaN	5	5	5	42.7	42.7	42.7	10.921	0	77.515	4617400000	66	sp|Q9NP97|DLRB1_HUMAN;sp|Q8TF09|DLRB2_HUMAN
sp|Q9NQC3|RTN4_HUMAN	27.6102	28.3332	29.3294	29.2589	30.151	28.6916	NaN	NaN	NaN	18	18	18	18.5	18.5	18.5	129.93	0	323.31	28137000000	350	sp|Q9NQC3|RTN4_HUMAN
sp|Q9NQP4|PFD4_HUMAN	24.6594	24.7228	25.3733	24.8019	24.3309	25.0402	NaN	NaN	NaN	5	5	5	37.3	37.3	37.3	15.314	0	150.65	1925900000	61	sp|Q9NQP4|PFD4_HUMAN
sp|Q9NR09|BIRC6_HUMAN	26.9797	24.3598	23.9469	NaN	NaN	NaN	NaN	NaN	NaN	19	19	19	6.6	6.6	6.6	530.25	0	128.56	984800000	56	sp|Q9NR09|BIRC6_HUMAN
sp|Q9NR45|SIAS_HUMAN	25.7156	25.2235	25.9964	25.1359	25.7121	25.7825	NaN	NaN	NaN	9	9	9	42.9	42.9	42.9	40.307	0	225.37	2591600000	66	sp|Q9NR45|SIAS_HUMAN
sp|Q9NRX4|PHP14_HUMAN	26.4306	25.7112	25.4914	26.348	25.546	25.964	NaN	NaN	NaN	6	6	6	56.8	56.8	56.8	13.832	0	323.31	4348700000	119	sp|Q9NRX4|PHP14_HUMAN
sp|Q9NSD9|SYFB_HUMAN	27.5489	27.841	26.5915	27.111	26.7005	26.1713	NaN	NaN	25.0388	18	18	18	34.1	34.1	34.1	66.115	0	307.67	6956100000	184	sp|Q9NSD9|SYFB_HUMAN
sp|Q9NTK5|OLA1_HUMAN	25.2776	26.8077	26.4239	27.2692	27.2415	27.4047	NaN	NaN	26.0206	8	8	8	36.9	36.9	36.9	44.743	0	142.3	6656000000	188	sp|Q9NTK5|OLA1_HUMAN
sp|Q9NUP9|LIN7C_HUMAN;sp|O14910|LIN7A_HUMAN	23.859	24.1975	25.4166	23.7957	NaN	NaN	NaN	NaN	NaN	3	3	3	19.3	19.3	19.3	21.834	0	41.954	973090000	18	sp|Q9NUP9|LIN7C_HUMAN
sp|Q9NUQ9|FA49B_HUMAN	25.7524	24.8333	24.9268	24.8834	25.1759	25.4224	NaN	NaN	NaN	8	8	8	33	33	33	36.748	0	101.53	1945700000	59	sp|Q9NUQ9|FA49B_HUMAN
sp|Q9NWV4|CA123_HUMAN	24.8747	24.9419	24.9825	25.332	NaN	25.0028	NaN	NaN	NaN	5	5	5	41.9	41.9	41.9	18.048	0	110.37	1638100000	51	sp|Q9NWV4|CA123_HUMAN
sp|Q9NY33|DPP3_HUMAN	26.0148	25.5448	25.7702	NaN	26.0099	25.8188	NaN	NaN	25.7574	12	12	12	29.3	29.3	29.3	82.588	0	323.31	3004200000	74	sp|Q9NY33|DPP3_HUMAN
sp|Q9NYU2|UGGG1_HUMAN;sp|Q9NYU1|UGGG2_HUMAN	24.7084	26.1719	29.0876	28.0754	28.2951	27.6255	NaN	NaN	25.8064	44	44	44	39.4	39.4	39.4	177.19	0	323.31	10039000000	271	sp|Q9NYU2|UGGG1_HUMAN
sp|Q9NZB2|F120A_HUMAN	25.1061	25.4276	25.1716	NaN	NaN	NaN	NaN	NaN	NaN	9	9	9	11.9	11.9	11.9	121.89	0	122.51	1022800000	35	sp|Q9NZB2|F120A_HUMAN
sp|Q9NZL9|MAT2B_HUMAN	26.7038	25.8325	25.5924	25.5092	25.3334	26.0844	NaN	NaN	NaN	8	8	8	36.5	36.5	36.5	37.551	0	243.89	3070100000	64	sp|Q9NZL9|MAT2B_HUMAN
sp|Q9P000|COMD9_HUMAN	22.9512	23.1235	24.2851	23.4206	NaN	NaN	NaN	NaN	NaN	5	5	5	37.4	37.4	37.4	21.819	0	95.695	695210000	37	sp|Q9P000|COMD9_HUMAN
sp|Q9P2J5|SYLC_HUMAN	29.1975	25.0632	28.533	27.8916	29.1282	29.7005	NaN	NaN	26.2071	50	50	50	50.8	50.8	50.8	134.46	0	323.31	18008000000	432	sp|Q9P2J5|SYLC_HUMAN
sp|Q9UBF2|COPG2_HUMAN	24.7929	24.2537	NaN	24.5248	24.1716	24.391	NaN	NaN	NaN	8	6	6	15.3	13	13	97.621	0	150.98	1064900000	63	sp|Q9UBF2|COPG2_HUMAN
sp|Q9UBP6|TRMB_HUMAN	24.5176	24.8514	24.4031	23.9909	NaN	NaN	NaN	NaN	23.9911	3	3	3	17	17	17	31.471	0	43.083	934760000	36	sp|Q9UBP6|TRMB_HUMAN
sp|Q9UBQ0|VPS29_HUMAN	25.3272	25.4468	26.0401	25.1933	NaN	24.7906	NaN	NaN	NaN	6	6	6	47.3	47.3	47.3	20.505	0	58.44	2250900000	40	sp|Q9UBQ0|VPS29_HUMAN
sp|Q9UBQ5|EIF3K_HUMAN	26.7165	26.2383	26.2639	26.1609	NaN	25.6334	NaN	NaN	NaN	5	5	5	32.1	32.1	32.1	25.059	0	246.4	3905500000	56	sp|Q9UBQ5|EIF3K_HUMAN
sp|Q9UBQ7|GRHPR_HUMAN	27.0111	26.0586	26.2888	NaN	26.2294	26.5724	NaN	NaN	NaN	9	9	9	51.5	51.5	51.5	35.668	0	323.31	3937100000	80	sp|Q9UBQ7|GRHPR_HUMAN
sp|Q9UBT2|SAE2_HUMAN	26.1736	26.3079	25.6905	NaN	25.8473	NaN	NaN	NaN	NaN	11	11	11	29.8	29.8	29.8	71.223	0	131.2	2588600000	57	sp|Q9UBT2|SAE2_HUMAN
sp|Q9UBW8|CSN7A_HUMAN	26.9109	24.8809	22.208	25.9683	23.6966	25.3108	NaN	NaN	NaN	9	9	9	42.2	42.2	42.2	30.276	0	192.3	2445000000	108	sp|Q9UBW8|CSN7A_HUMAN
sp|Q9UG63|ABCF2_HUMAN	25.778	25.9731	26.0307	NaN	NaN	23.6898	NaN	NaN	NaN	4	4	4	8.2	8.2	8.2	71.289	0	28.65	1650100000	36	sp|Q9UG63|ABCF2_HUMAN
sp|Q9UHA4|LTOR3_HUMAN	24.5691	26.5881	26.7992	26.486	26.5896	25.2478	NaN	NaN	NaN	4	4	4	49.2	49.2	49.2	13.623	0	222.22	5243200000	107	sp|Q9UHA4|LTOR3_HUMAN
sp|Q9UHD8|SEPT9_HUMAN	24.8236	25.1289	25.6033	NaN	24.7971	23.8361	NaN	NaN	25.7438	7	7	7	11.8	11.8	11.8	65.401	0	90.732	1599900000	40	sp|Q9UHD8|SEPT9_HUMAN
sp|Q9UHV9|PFD2_HUMAN	26.2697	25.9969	26.0452	25.9378	NaN	26.3363	NaN	NaN	NaN	5	5	5	31.8	31.8	31.8	16.648	0	206.44	3562300000	39	sp|Q9UHV9|PFD2_HUMAN
sp|Q9UHY1|NRBP_HUMAN	25.3659	24.7186	24.0227	NaN	NaN	23.3233	NaN	NaN	NaN	4	4	4	13.1	13.1	13.1	59.844	0	138.86	1056300000	42	sp|Q9UHY1|NRBP_HUMAN
sp|Q9UI30|TR112_HUMAN	25.8928	26.2367	24.3998	25.1908	NaN	24.1396	NaN	NaN	NaN	6	6	6	56.8	56.8	56.8	14.199	0	181.16	2655500000	54	sp|Q9UI30|TR112_HUMAN
sp|Q9UIA9|XPO7_HUMAN	26.806	25.3035	NaN	24.196	25.0746	24.8341	NaN	NaN	NaN	16	16	16	20.1	20.1	20.1	123.91	0	180.53	2095800000	62	sp|Q9UIA9|XPO7_HUMAN
sp|Q9UJ70|NAGK_HUMAN	26.1774	24.8164	25.0128	25.3481	NaN	25.6567	NaN	NaN	NaN	7	7	7	29.1	29.1	29.1	37.375	0	169.41	2008600000	43	sp|Q9UJ70|NAGK_HUMAN
sp|Q9UL25|RAB21_HUMAN	24.0603	25.0984	25.7878	25.2828	25.2602	NaN	NaN	NaN	NaN	8	8	8	39.6	39.6	39.6	24.347	0	160.23	1805300000	66	sp|Q9UL25|RAB21_HUMAN
sp|Q9UL46|PSME2_HUMAN	28.78	28.5489	27.1282	28.6134	27.451	28.3423	NaN	NaN	27.6503	18	18	18	74.1	74.1	74.1	27.401	0	309.99	18048000000	446	sp|Q9UL46|PSME2_HUMAN
sp|Q9ULV4|COR1C_HUMAN	26.8259	27.6972	27.0934	27.2431	26.9243	27.2319	NaN	NaN	NaN	9	9	9	23.4	23.4	23.4	53.248	0	323.31	7617500000	174	sp|Q9ULV4|COR1C_HUMAN
sp|Q9UNM6|PSD13_HUMAN	26.6657	26.8681	27.6475	27.7145	26.3974	27.5181	NaN	NaN	26.4018	16	16	16	53.5	53.5	53.5	42.945	0	323.31	8121400000	187	sp|Q9UNM6|PSD13_HUMAN
sp|Q9UNS2|CSN3_HUMAN	NaN	26.2302	26.4795	26.1604	25.7502	26.7123	NaN	NaN	NaN	4	4	4	20.3	20.3	20.3	47.873	0	216.05	3415700000	94	sp|Q9UNS2|CSN3_HUMAN
sp|Q9UPN3|MACF1_HUMAN;REV__sp|O43149|ZZEF1_HUMAN	31.429	29.4837	28.3179	28.1837	28.0624	27.5073	NaN	NaN	NaN	180	179	174	30.7	30.6	29.8	838.3	0	323.31	28142000000	847	sp|Q9UPN3|MACF1_HUMAN
sp|Q9UQ80|PA2G4_HUMAN	26.1522	28.0112	27.2765	27.5698	27.502	27.6549	NaN	NaN	26.7146	17	17	17	53.6	53.6	53.6	43.786	0	323.31	10529000000	199	sp|Q9UQ80|PA2G4_HUMAN
sp|Q9Y224|RTRAF_HUMAN	26.017	26.8067	25.7208	27.1359	24.7606	24.9376	NaN	NaN	NaN	11	11	11	50.8	50.8	50.8	28.068	0	230.27	4528000000	167	sp|Q9Y224|RTRAF_HUMAN
sp|Q9Y230|RUVB2_HUMAN	26.2237	27.0027	25.5487	26.5155	26.2266	26.3345	NaN	NaN	27.6544	11	11	11	28.1	28.1	28.1	51.156	0	85.208	4716100000	78	sp|Q9Y230|RUVB2_HUMAN
sp|Q9Y262|EIF3L_HUMAN	27.3986	27.5931	25.6406	26.3764	25.0512	26.363	NaN	NaN	NaN	20	20	20	44.3	44.3	44.3	66.726	0	323.31	5681000000	156	sp|Q9Y262|EIF3L_HUMAN
sp|Q9Y265|RUVB1_HUMAN	27.372	27.5109	25.6948	27.0493	26.3715	27.0218	NaN	NaN	28.1086	16	16	16	51.5	51.5	51.5	50.227	0	312.29	7867500000	183	sp|Q9Y265|RUVB1_HUMAN
sp|Q9Y281|COF2_HUMAN	26.2018	25.5831	25.2411	26.3581	24.6573	26.1456	NaN	NaN	NaN	20	11	11	88	60.8	60.8	18.736	0	227.59	3411400000	89	sp|Q9Y281|COF2_HUMAN
sp|Q9Y285|SYFA_HUMAN	26.8646	26.9062	26.9618	27.0992	26.0559	26.5201	NaN	NaN	26.0234	6	6	6	26.2	26.2	26.2	57.563	0	210.64	5989000000	129	sp|Q9Y285|SYFA_HUMAN
sp|Q9Y2B0|CNPY2_HUMAN	24.8837	NaN	26.513	24.684	25.7886	24.9491	NaN	NaN	NaN	6	6	6	46.2	46.2	46.2	20.652	0	231.46	2512500000	75	sp|Q9Y2B0|CNPY2_HUMAN
sp|Q9Y2Z0|SGT1_HUMAN	26.2483	25.6274	24.6824	NaN	25.0616	24.9014	NaN	NaN	NaN	6	6	6	24.9	24.9	24.9	41.024	0	126.67	2067500000	49	sp|Q9Y2Z0|SGT1_HUMAN
sp|Q9Y3A5|SBDS_HUMAN	26.5207	26.9306	25.56	26.5589	25.3348	26.0496	NaN	NaN	NaN	16	16	16	64.4	64.4	64.4	28.763	0	323.31	4386600000	110	sp|Q9Y3A5|SBDS_HUMAN
sp|Q9Y3B8|ORN_HUMAN	25.9702	24.1375	24.4476	25.9299	NaN	25.625	NaN	NaN	NaN	5	5	5	25.7	25.7	25.7	26.832	0	155.85	2175200000	59	sp|Q9Y3B8|ORN_HUMAN
sp|Q9Y3F4|STRAP_HUMAN	25.9986	26.506	26.6716	NaN	25.4803	26.142	NaN	NaN	NaN	11	11	11	47.7	47.7	47.7	38.438	0	148.3	3529700000	88	sp|Q9Y3F4|STRAP_HUMAN
sp|Q9Y3I0|RTCB_HUMAN	25.6877	26.6204	25.8621	25.1986	NaN	25.4014	NaN	NaN	NaN	10	10	10	31.7	31.7	31.7	55.21	0	245.13	2744500000	72	sp|Q9Y3I0|RTCB_HUMAN
sp|Q9Y3U8|RL36_HUMAN	26.3897	26.9768	25.7823	26.213	NaN	26.3532	NaN	NaN	NaN	4	4	4	34.3	34.3	34.3	12.254	0	37.653	5241100000	41	sp|Q9Y3U8|RL36_HUMAN
sp|Q9Y490|TLN1_HUMAN	30.3703	31.3588	31.2354	31.531	31.6317	31.5378	NaN	NaN	27.355	114	114	103	60.4	60.4	56.5	269.76	0	323.31	109380000000	1749	sp|Q9Y490|TLN1_HUMAN
sp|Q9Y4L1|HYOU1_HUMAN;sp|Q9BXT5|TEX15_HUMAN	27.464	24.3061	31.4998	28.7275	32.0778	28.7697	NaN	NaN	28.0982	78	78	78	63.9	63.9	63.9	111.33	0	323.31	59420000000	1049	sp|Q9Y4L1|HYOU1_HUMAN
sp|Q9Y5L0|TNPO3_HUMAN	26.7288	25.2817	24.8899	24.9271	25.5459	25.2499	NaN	NaN	NaN	10	10	10	16.5	16.5	16.5	104.2	0	323.31	3120100000	122	sp|Q9Y5L0|TNPO3_HUMAN
sp|Q9Y617|SERC_HUMAN	27.8433	24.9409	26.6216	25.956	27.0746	27.6433	NaN	NaN	24.9218	21	21	21	70.8	70.8	70.8	40.422	0	177.3	6376000000	144	sp|Q9Y617|SERC_HUMAN
sp|Q9Y678|COPG1_HUMAN	28.0765	27.87	27.7431	27.3353	27.5914	27.4139	NaN	NaN	NaN	24	24	22	43.2	43.2	41	97.717	0	323.31	10673000000	280	sp|Q9Y678|COPG1_HUMAN
sp|Q9Y696|CLIC4_HUMAN	26.9763	27.3502	24.8617	27.5524	25.3777	27.4371	NaN	NaN	NaN	14	14	14	69.6	69.6	69.6	28.772	0	323.31	6774600000	159	sp|Q9Y696|CLIC4_HUMAN
sp|Q9Y6M1|IF2B2_HUMAN;sp|Q9NZI8|IF2B1_HUMAN	24.8964	25.6775	25.4153	NaN	NaN	24.4757	NaN	NaN	NaN	8	7	7	18.5	16.4	16.4	66.121	0	163.11	1477700000	40	sp|Q9Y6M1|IF2B2_HUMAN

## Sheet: 2. All Regulations
Up- and downregulated proteins in the treated T1454 cells compared to the control (t-test)
	Intensity controls			Intensity treated T1454
T: Protein IDs	LFQ intensity Control_1	LFQ intensity Control_2	LFQ intensity Control_3	LFQ intensity Treated_T1454_1	LFQ intensity Treated_T1454_2	LFQ intensity Treated_T1454_3	C: Student's T-test Significant Control_T1454	N: Student's T-test p-value Control_T1454	N: Student's T-test Difference Control_T1454	N: Student's T-test Test statistic Control_T1454
sp|P08670|VIME_HUMAN;sp|P17661|DESM_HUMAN;sp|Q16352|AINX_HUMAN;sp|P07197|NFM_HUMAN;sp|P07196|NFL_HUMAN	3873700000	23641000000	20158000000	34191000000	33870000000	43258000000	+	0.0359278	-21215400000	-3.10839
sp|P14136|GFAP_HUMAN	725470000	13766000000	6888300000	25995000000	19127000000	27154000000	+	0.0199354	-16965400000	-3.75067
sp|P00558|PGK1_HUMAN;sp|P07205|PGK2_HUMAN	1582900000	1822800000	1846600000	2844400000	2743400000	2633600000	+	0.000678423	-989700000	-9.52462
sp|P40926|MDHM_HUMAN	1647100000	984870000	1278100000	2151300000	1966000000	2618900000	+	0.0259898	-942043000	-3.45272
sp|P46940|IQGA1_HUMAN;sp|Q86VI3|IQGA3_HUMAN	1472900000	1575500000	2150500000	2829900000	2244100000	2939300000	+	0.0359	-938133000	-3.10919
sp|P52209|6PGD_HUMAN	282130000	641360000	508350000	899630000	864810000	775690000	+	0.0292876	-369430000	-3.32332
sp|P09211|GSTP1_HUMAN	1049800000	794280000	963010000	1263000000	1124800000	1266500000	+	0.0330063	-282403000	-3.19664
sp|P00441|SODC_HUMAN	962850000	1063200000	1131900000	1174800000	1339700000	1428600000	+	0.0424926	-261717000	-2.93755
sp|Q13557|KCC2D_HUMAN;sp|Q9UQM7|KCC2A_HUMAN;sp|Q13554|KCC2B_HUMAN	519180000	513570000	539260000	685930000	609030000	801770000	+	0.0364825	-174907000	-3.09259
sp|P54577|SYYC_HUMAN	217380000	246620000	127760000	332740000	273910000	353850000	+	0.0460601	-122913000	-2.85719
sp|Q9NTK5|OLA1_HUMAN	40675000	117470000	90028000	161750000	158670000	177680000	+	0.0230289	-83309000	-3.58673
sp|P07954|FUMH_HUMAN	18972000	76728000	58389000	135210000	93279000	174610000	+	0.0458855	-83003300	-2.86095
sp|P35237|SPB6_HUMAN	114890000	68677000	85910000	187380000	137830000	178450000	+	0.018537	-78061000	-3.8351
sp|P09622|DLDH_HUMAN	0	0	0	63533000	40090000	37812000	+	0.00457825	-47145000	-5.73516
sp|P81605|DCD_HUMAN	0	0	0	39452000	39883000	54933000	+	0.00092273	-44756000	-8.79289
sp|P61201|CSN2_HUMAN	0	36581000	0	66433000	41371000	56167000	+	0.0403106	-42463300	-2.99069
sp|P13861|KAP2_HUMAN;sp|P31323|KAP3_HUMAN	20448000	25916000	0	48244000	51580000	45264000	+	0.0152837	-32908000	-4.06516
sp|P26440|IVD_HUMAN	0	0	0	23358000	18735000	16972000	+	0.000493714	-19688300	-10.3399
sp|Q9C0B1|FTO_HUMAN	10305000	7151200	3209400	0	0	0	+	0.028407	6888530	3.35612
sp|Q6NW29|RWDD4_HUMAN	9895400	9696000	6975100	0	0	0	+	0.000713445	8855500	9.40114
sp|Q9H2U1|DHX36_HUMAN	17120000	9629100	14439000	0	0	0	+	0.00331144	13729400	6.26525
sp|Q14669|TRIPC_HUMAN	24333000	11943000	11780000	0	0	0	+	0.0182555	16018700	3.85302
sp|Q08945|SSRP1_HUMAN	14905000	17357000	16201000	0	0	0	+	2.18833e-05	16154300	22.8099
sp|P41223|BUD31_HUMAN	21603000	18264000	11697000	0	0	0	+	0.0041111	17188000	5.90697
sp|Q460N5|PAR14_HUMAN	23338000	15129000	16059000	0	0	0	+	0.00218827	18175300	7.00329
sp|P36776|LONM_HUMAN	20650000	16402000	33099000	0	13067000	0	+	0.0456423	19028000	2.86622
sp|Q9NP79|VTA1_HUMAN	46850000	56815000	58892000	30606000	30353000	44216000	+	0.0315796	19127300	3.24315
sp|Q9UBP6|TRMB_HUMAN	24018000	30271000	22185000	16672000	0	0	+	0.0304243	19934000	3.28267
sp|P04271|S100B_HUMAN	20628000	12618000	29356000	0	0	0	+	0.0124731	20867300	4.31739
sp|P62633|CNBP_HUMAN	35687000	32807000	34349000	19065000	0	20217000	+	0.0327056	21187000	3.20625
sp|P11387|TOP1_HUMAN;sp|Q969P6|TOP1M_HUMAN	13907000	16831000	35383000	0	0	0	+	0.0305695	22040300	3.27761
sp|P17252|KPCA_HUMAN;sp|P05771|KPCB_HUMAN	23802000	24016000	20778000	0	0	0	+	2.58641e-05	22865300	21.8704
sp|Q07955|SRSF1_HUMAN	46783000	66281000	42607000	21868000	36820000	22694000	+	0.0475264	24763000	2.82623
sp|P38117|ETFB_HUMAN	13694000	21605000	39018000	0	0	0	+	0.029604	24772300	3.31182
sp|P40763|STAT3_HUMAN	24467000	27269000	23509000	0	0	0	+	2.42251e-05	25081700	22.2337
sp|Q8WXF1|PSPC1_HUMAN	37779000	38952000	19294000	0	0	18992000	+	0.0459273	25677700	2.86005
sp|Q9UHY1|NRBP_HUMAN	43241000	27609000	17043000	0	0	10496000	+	0.0369204	25799000	3.08031
sp|O15145|ARPC3_HUMAN	56043000	50464000	63251000	28056000	31413000	28940000	+	0.00211137	27116300	7.07043
sp|P25325|THTM_HUMAN	43387000	17994000	20820000	0	0	0	+	0.0270228	27400300	3.41018
sp|Q08J23|NSUN2_HUMAN	38867000	32743000	27271000	0	0	15419000	+	0.0105369	27820700	4.53503
sp|P10515|ODP2_HUMAN	20298000	29247000	35475000	0	0	0	+	0.00300123	28340000	6.43414
sp|P33992|MCM5_HUMAN	24833000	34577000	31682000	0	0	0	+	0.000463392	30364000	10.5102
sp|Q92499|DDX1_HUMAN	127510000	119740000	135100000	87619000	114560000	88960000	+	0.0363932	30403700	3.09511
sp|Q96CW1|AP2M1_HUMAN	17522000	32207000	41964000	0	0	0	+	0.0126181	30564300	4.30275
sp|P33316|DUT_HUMAN	18374000	35600000	38393000	0	0	0	+	0.00793706	30789000	4.91865
sp|P36543|VATE1_HUMAN;sp|Q96A05|VATE2_HUMAN	48090000	40363000	39887000	32349000	0	0	+	0.0449642	31997000	2.88108
sp|P49736|MCM2_HUMAN	47178000	27287000	45399000	22078000	0	0	+	0.0285074	32595300	3.35232
sp|P28482|MK01_HUMAN	36808000	42961000	54302000	0	0	31101000	+	0.0412209	34323300	2.96812
sp|Q9Y6M1|IF2B2_HUMAN;sp|Q9NZI8|IF2B1_HUMAN	31229000	53664000	44747000	0	0	23330000	+	0.025088	35436700	3.49153
sp|O00425|IF2B3_HUMAN	50038000	55077000	24068000	0	0	20553000	+	0.0373406	36210000	3.06869
sp|O15371|EIF3D_HUMAN	64820000	56953000	47475000	27628000	0	30264000	+	0.0271456	37118700	3.40526
sp|P78347|GTF2I_HUMAN	45632000	58499000	26265000	0	16908000	0	+	0.0258131	37829300	3.4602
sp|O43396|TXNL1_HUMAN	88690000	98741000	58490000	34721000	42068000	55040000	+	0.047715	38030700	2.82233
sp|Q14694|UBP10_HUMAN	50359000	40273000	35786000	0	0	10705000	+	0.00232087	38571000	6.89411
sp|P67870|CSK2B_HUMAN	42959000	60110000	37347000	23728000	0	0	+	0.0205078	38896000	3.71814
sp|P38159|RBMX_HUMAN;sp|Q96E39|RMXL1_HUMAN;sp|O75526|RMXL2_HUMAN;sp|Q8N7X1|RMXL3_HUMAN	42897000	50471000	45725000	22168000	0	0	+	0.0072139	38975000	5.05339
sp|Q9NZB2|F120A_HUMAN	36115000	45131000	37793000	0	0	0	+	0.000137662	39679700	14.3332
sp|Q16643|DREB_HUMAN	43608000	57002000	59756000	34909000	0	0	+	0.0298437	41819000	3.30321
sp|O75131|CPNE3_HUMAN;sp|Q8IYJ1|CPNE9_HUMAN;sp|Q96A23|CPNE4_HUMAN;sp|O95741|CPNE6_HUMAN;sp|Q86YQ8|CPNE8_HUMAN;sp|Q9HCH3|CPNE5_HUMAN;sp|Q9UBL6|CPNE7_HUMAN	96081000	87435000	113880000	61633000	37531000	71592000	+	0.0297095	42213300	3.30802
sp|Q96AE4|FUBP1_HUMAN	38925000	71914000	43052000	0	25205000	0	+	0.0325058	42895300	3.21268
sp|Q9BXP5|SRRT_HUMAN	43180000	41354000	47386000	0	0	0	+	1.61458e-05	43973300	24.6225
sp|P62847|RS24_HUMAN	86526000	36553000	56222000	0	24028000	18823000	+	0.0489817	45483300	2.79659
sp|P28074|PSB5_HUMAN	93193000	89068000	103310000	50302000	36961000	59473000	+	0.00401798	46278300	5.94408
sp|Q8NCM8|DYHC2_HUMAN	45420000	41548000	72999000	0	0	0	+	0.0057486	53322300	5.38521
sp|Q9BUJ2|HNRL1_HUMAN	69799000	81207000	54267000	0	27913000	17106000	+	0.00903453	53418000	4.7404
sp|P49207|RL34_HUMAN	96127000	97598000	126780000	46722000	58728000	53702000	+	0.00704205	53784300	5.08784
sp|P33991|MCM4_HUMAN	64897000	67175000	34014000	0	0	0	+	0.00662086	55362000	5.17681
sp|P09496|CLCA_HUMAN	86196000	72743000	51451000	0	0	37652000	+	0.0233318	57579300	3.5721
sp|Q9UG63|ABCF2_HUMAN	57536000	65871000	68553000	0	0	13531000	+	0.000444519	59476300	10.6233
sp|Q00688|FKBP3_HUMAN	96577000	81483000	64035000	59269000	0	0	+	0.0495473	60942000	2.78534
sp|Q14566|MCM6_HUMAN	82874000	90814000	35627000	19884000	0	0	+	0.0267511	63143700	3.42118
sp|O94973|AP2A2_HUMAN	160840000	151750000	113550000	61482000	99634000	69150000	+	0.0246315	65291300	3.51182
sp|Q59GN2|R39L5_HUMAN;sp|P62891|RL39_HUMAN	57635000	117970000	108960000	43113000	18280000	26099000	+	0.0311736	65691000	3.25684
sp|Q15717|ELAV1_HUMAN	81819000	87388000	95846000	35238000	0	27260000	+	0.0040985	67518300	5.91193
sp|Q9Y678|COPG1_HUMAN	283050000	245310000	224650000	169330000	202220000	178820000	+	0.0265385	67546700	3.42988
sp|P07910|HNRPC_HUMAN;sp|P0DMR1|HNRC4_HUMAN;sp|O60812|HNRC1_HUMAN;sp|B7ZW38|HNRC3_HUMAN;sp|B2RXH8|HNRC2_HUMAN	97598000	42372000	94857000	28117000	0	0	+	0.0272812	68903300	3.39985
sp|P83881|RL36A_HUMAN;sp|Q969Q0|RL36L_HUMAN	107060000	80261000	142320000	62120000	0	47686000	+	0.0478269	73278300	2.82002
sp|Q14444|CAPR1_HUMAN	59953000	103300000	93792000	0	0	26741000	+	0.00845299	76768000	4.83135
sp|P46060|RAGP1_HUMAN	122720000	110840000	62850000	0	29796000	35237000	+	0.0224322	77125700	3.61623
sp|P63010|AP2B1_HUMAN	307050000	279280000	251280000	200480000	228200000	149230000	+	0.0372337	86566700	3.07163
sp|O60493|SNX3_HUMAN	118480000	110870000	114140000	47448000	0	36131000	+	0.00391918	86637000	5.98464
sp|P46779|RL28_HUMAN	104280000	153150000	123990000	32837000	0	67479000	+	0.0177321	93701300	3.88723
sp|P52292|IMA1_HUMAN	110230000	158910000	51647000	0	0	32860000	+	0.0433106	95975700	2.91845
sp|P52272|HNRPM_HUMAN	107510000	169530000	101460000	0	53576000	33756000	+	0.0223026	97056000	3.62276
sp|P46783|RS10_HUMAN;sp|Q9NQ39|RS10L_HUMAN	293320000	248390000	275070000	221940000	154750000	132200000	+	0.0265997	102630000	3.42737
sp|P62857|RS28_HUMAN	143400000	223060000	272260000	121480000	51025000	94960000	+	0.044492	123752000	2.89159
sp|P33993|MCM7_HUMAN	89361000	126450000	157660000	0	0	0	+	0.0032325	124490000	6.30632
sp|Q15365|PCBP1_HUMAN	260220000	211680000	222230000	61612000	150470000	96135000	+	0.0124344	128638000	4.32132
sp|Q15233|NONO_HUMAN	205020000	270240000	309110000	148440000	62119000	179120000	+	0.0469594	131564000	2.83807
sp|Q13283|G3BP1_HUMAN	186920000	303270000	221010000	149760000	67207000	93840000	+	0.0341976	133464000	3.15959
sp|P62888|RL30_HUMAN	566930000	421540000	476510000	350470000	327060000	379520000	+	0.039145	135977000	3.02047
sp|P62854|RS26_HUMAN;sp|Q5JNZ5|RS26L_HUMAN	258260000	270770000	361250000	179390000	149010000	147870000	+	0.0154362	138003000	4.0531
sp|P12956|XRCC6_HUMAN	339670000	380620000	277840000	113300000	213460000	237880000	+	0.0405844	144497000	2.98384
sp|P62899|RL31_HUMAN	294060000	275490000	334780000	216900000	110000000	128360000	+	0.016039	149690000	4.00682
sp|Q15366|PCBP2_HUMAN	318610000	278510000	265570000	92583000	140190000	162620000	+	0.00396023	155766000	5.96764
sp|P18621|RL17_HUMAN	337530000	302150000	256960000	156070000	93129000	146440000	+	0.00537839	167000000	5.48571
sp|P83731|RL24_HUMAN	271420000	359180000	365300000	160220000	176130000	146620000	+	0.00558855	170977000	5.42766
sp|P46782|RS5_HUMAN	627660000	579260000	606260000	458320000	381360000	424590000	+	0.00224614	182970000	6.95466
sp|P32969|RL9_HUMAN	339000000	352470000	388680000	290930000	91474000	128770000	+	0.039523	189659000	3.0107
sp|P62266|RS23_HUMAN	322020000	250370000	320450000	167560000	41260000	81860000	+	0.0103984	200720000	4.55243
sp|P61254|RL26_HUMAN;sp|Q9UNX3|RL26L_HUMAN	159830000	256970000	359140000	135560000	0	33077000	+	0.0454836	202434000	2.86967
sp|P62750|RL23A_HUMAN	227430000	181080000	376170000	93899000	0	81065000	+	0.0365853	203239000	3.08969
sp|P61313|RL15_HUMAN	358820000	417840000	364650000	158760000	151730000	203450000	+	0.00108266	209123000	8.43339
sp|O00571|DDX3X_HUMAN;sp|O15523|DDX3Y_HUMAN	272530000	316690000	298070000	92920000	67580000	98824000	+	0.000196599	209322000	13.0908
sp|P84098|RL19_HUMAN	185110000	410010000	263300000	70902000	53423000	103020000	+	0.0356511	210358000	3.11638
sp|P11802|CDK4_HUMAN;sp|P50750|CDK9_HUMAN;sp|Q96Q40|CDK15_HUMAN;sp|O94921|CDK14_HUMAN;sp|Q07002|CDK18_HUMAN;sp|Q00536|CDK16_HUMAN;sp|Q00537|CDK17_HUMAN;sp|Q9NYV4|CDK12_HUMAN;sp|Q14004|CDK13_HUMAN	282140000	130860000	272550000	0	0	0	+	0.00950062	228517000	4.6725
sp|P09651|ROA1_HUMAN;sp|Q32P51|RA1L2_HUMAN	496020000	359460000	442500000	182230000	223250000	195760000	+	0.00501273	232247000	5.59364
sp|P40429|RL13A_HUMAN;sp|Q6NVV1|R13P3_HUMAN	414680000	450210000	391820000	284560000	75510000	181410000	+	0.019059	238410000	3.80272
sp|P05387|RLA2_HUMAN	563100000	324070000	446710000	180690000	266870000	170540000	+	0.0341417	238593000	3.16129
sp|P46778|RL21_HUMAN	310540000	331530000	487830000	186280000	105070000	115170000	+	0.0172263	241127000	3.92147
sp|Q02543|RL18A_HUMAN	388760000	450600000	459680000	221870000	124020000	157680000	+	0.00187475	265157000	7.29754
sp|P46776|RL27A_HUMAN	378240000	435070000	499540000	236560000	81440000	177450000	+	0.00887789	272467000	4.76418
sp|P25398|RS12_HUMAN	542690000	760280000	583200000	350710000	339040000	360680000	+	0.0142418	278580000	4.1516
sp|P30050|RL12_HUMAN	598660000	615300000	775680000	453650000	417820000	271240000	+	0.023647	282310000	3.55712
sp|P62753|RS6_HUMAN	680890000	618320000	420460000	268000000	301220000	300940000	+	0.0233191	283170000	3.57271
sp|P42766|RL35_HUMAN	338680000	387840000	528330000	115770000	38732000	210020000	+	0.0170017	296776000	3.93706
sp|P61247|RS3A_HUMAN	1160200000	979730000	799190000	550490000	685510000	588240000	+	0.0291921	371627000	3.32682
sp|Q00839|HNRPU_HUMAN	852930000	752720000	813530000	395330000	413080000	381410000	+	0.000178763	409787000	13.4118
sp|P62081|RS7_HUMAN	1023700000	1113800000	1234800000	880350000	574690000	670850000	+	0.0189175	415470000	3.81139
sp|P46777|RL5_HUMAN	1119700000	610460000	795720000	461890000	372460000	367440000	+	0.0439054	441363000	2.90482
sp|P11940|PABP1_HUMAN;sp|Q9H361|PABP3_HUMAN;sp|Q4VXU2|PAP1L_HUMAN;sp|Q96DU9|PABP5_HUMAN	770890000	913720000	480690000	339770000	232200000	261820000	+	0.0278249	443837000	3.37846
sp|P62249|RS16_HUMAN	953900000	896320000	1077100000	557770000	369640000	630760000	+	0.00840326	456383000	4.83948
sp|Q07020|RL18_HUMAN	597850000	869990000	842230000	350070000	151360000	239640000	+	0.00729532	523000000	5.03741
sp|P19338|NUCL_HUMAN	2135200000	1892300000	1962600000	1380300000	1452400000	1496400000	+	0.00225592	553667000	6.9466
sp|P62701|RS4X_HUMAN;sp|P22090|RS4Y1_HUMAN;sp|Q8TD47|RS4Y2_HUMAN	1400100000	1105800000	831870000	478040000	489090000	606900000	+	0.0254617	587913000	3.47525
sp|P62917|RL8_HUMAN	1355300000	1168500000	702890000	495830000	462750000	451430000	+	0.0357198	605560000	3.11439
sp|P46781|RS9_HUMAN	911090000	870050000	1364900000	545100000	320120000	450120000	+	0.0235969	610233000	3.55949
sp|P62269|RS18_HUMAN	1176600000	1114100000	1312500000	682630000	418400000	635280000	+	0.00342424	622297000	6.2086
sp|P62277|RS13_HUMAN	1284500000	834870000	1324500000	652200000	281450000	609830000	+	0.0318527	633463000	3.23406
sp|P62280|RS11_HUMAN	855000000	1051900000	1447100000	441460000	400830000	571800000	+	0.0235564	646637000	3.5614
sp|Q01082|SPTB2_HUMAN	1326900000	1428900000	956610000	791620000	519600000	419340000	+	0.0219845	660617000	3.63898
sp|P26373|RL13_HUMAN	1046000000	1294400000	1103300000	523890000	161130000	487290000	+	0.00532009	757130000	5.5023
sp|P62424|RL7A_HUMAN	1801700000	1103000000	808420000	337190000	203540000	404520000	+	0.0372462	922623000	3.07129
sp|P18124|RL7_HUMAN	2382400000	1724800000	1218300000	678970000	688600000	754220000	+	0.0341452	1067900000	3.16119
sp|P29401|TKT_HUMAN;sp|P51854|TKTL1_HUMAN	2956600000	3067400000	2950300000	1397700000	1621900000	1917200000	+	0.000972376	1345830000	8.67351
sp|P13639|EF2_HUMAN	3543800000	3539000000	2346300000	1522800000	1751900000	1953200000	+	0.0284182	1400400000	3.35569

## Sheet: 3. Upregulated (treated)
Upregulated proteins in the treated T1454 cells compared to the control (t-test)
		Intensity controls			Intensity treated T1454
Accession nr.	Protein name	LFQ intensity Control_1	LFQ intensity Control_2	LFQ intensity Control_3	LFQ intensity Treated_T1454_1	LFQ intensity Treated_T1454_2	LFQ intensity Treated_T1454_3	C: Student's T-test Significant Control_T1454	N: Student's T-test p-value Control_T1454	N: Student's T-test Difference Control_T1454	N: Student's T-test Test statistic Control_T1454	T: Protein IDs
P08670/P17661/Q16352/P07197/P07196	Vimentin/Desmin/Alpha-internexin/Neurofilament medium and light polypeptide	3873700000	23641000000	20158000000	34191000000	33870000000	43258000000	+	0.0359278	-21215400000	-3.10839	sp|P08670|VIME_HUMAN;sp|P17661|DESM_HUMAN;sp|Q16352|AINX_HUMAN;sp|P07197|NFM_HUMAN;sp|P07196|NFL_HUMAN
P14136	Glial fibrillary acidic protein	725470000	13766000000	6888300000	25995000000	19127000000	27154000000	+	0.0199354	-16965400000	-3.75067	sp|P14136|GFAP_HUMAN
P00558/P07205	Phosphoglycerate kinase 1/2	1582900000	1822800000	1846600000	2844400000	2743400000	2633600000	+	0.000678423	-989700000	-9.52462	sp|P00558|PGK1_HUMAN;sp|P07205|PGK2_HUMAN
P40926	Malate dehydrogenase, mitochondrial	1647100000	984870000	1278100000	2151300000	1966000000	2618900000	+	0.0259898	-942043000	-3.45272	sp|P40926|MDHM_HUMAN
P46940/Q86VI3	Ras GTPase-activating-like protein IQGAP1/IQGAP3	1472900000	1575500000	2150500000	2829900000	2244100000	2939300000	+	0.0359	-938133000	-3.10919	sp|P46940|IQGA1_HUMAN;sp|Q86VI3|IQGA3_HUMAN
P52209	6-phosphogluconate dehydrogenase, decarboxylating	282130000	641360000	508350000	899630000	864810000	775690000	+	0.0292876	-369430000	-3.32332	sp|P52209|6PGD_HUMAN
P09211	Glutathione S-transferase P	1049800000	794280000	963010000	1263000000	1124800000	1266500000	+	0.0330063	-282403000	-3.19664	sp|P09211|GSTP1_HUMAN
P00441	Superoxide dismutase [Cu-Zn]	962850000	1063200000	1131900000	1174800000	1339700000	1428600000	+	0.0424926	-261717000	-2.93755	sp|P00441|SODC_HUMAN
Q13557/Q9UQM7/Q13554	Calcium/calmodulin-dependent protein kinase type II	519180000	513570000	539260000	685930000	609030000	801770000	+	0.0364825	-174907000	-3.09259	sp|Q13557|KCC2D_HUMAN;sp|Q9UQM7|KCC2A_HUMAN;sp|Q13554|KCC2B_HUMAN
P54577	Tyrosine--tRNA ligase, cytoplasmic	217380000	246620000	127760000	332740000	273910000	353850000	+	0.0460601	-122913000	-2.85719	sp|P54577|SYYC_HUMAN
Q9NTK5	Obg-like ATPase 1	40675000	117470000	90028000	161750000	158670000	177680000	+	0.0230289	-83309000	-3.58673	sp|Q9NTK5|OLA1_HUMAN
P07954	Fumarate hydratase, mitochondrial	18972000	76728000	58389000	135210000	93279000	174610000	+	0.0458855	-83003300	-2.86095	sp|P07954|FUMH_HUMAN
P35237	Serpin B6	114890000	68677000	85910000	187380000	137830000	178450000	+	0.018537	-78061000	-3.8351	sp|P35237|SPB6_HUMAN
P09622	Dihydrolipoyl dehydrogenase, mitochondrial	0	0	0	63533000	40090000	37812000	+	0.00457825	-47145000	-5.73516	sp|P09622|DLDH_HUMAN
P81605	Dermcidin	0	0	0	39452000	39883000	54933000	+	0.00092273	-44756000	-8.79289	sp|P81605|DCD_HUMAN
P61201	COP9 signalosome complex subunit 2	0	36581000	0	66433000	41371000	56167000	+	0.0403106	-42463300	-2.99069	sp|P61201|CSN2_HUMAN
P13861/P31323	cAMP-dependent protein kinase type II-alpha/beta regulatory subunit	20448000	25916000	0	48244000	51580000	45264000	+	0.0152837	-32908000	-4.06516	sp|P13861|KAP2_HUMAN;sp|P31323|KAP3_HUMAN
P26440	Isovaleryl-CoA dehydrogenase, mitochondrial	0	0	0	23358000	18735000	16972000	+	0.000493714	-19688300	-10.3399	sp|P26440|IVD_HUMAN
